# Supplementary material for: PROTACs bearing piperazine-containing linkers: what effect on their protonation state?
Source: Royal Society of Chemistry journal article supplement (doi:10.1039/d2ra03761k), 2022-01-01
Supplement: d2ra03761k1.pdf [file d2ra03761k1.pdf]

## Supporting Information

### **PROTACs bearing piperazine-containing linkers: which effect on their protonation state?**

Jenny Desantis,<sup>a (1)</sup> Andrea Mammoli,<sup>b (1)</sup> Michela Eleuteri,<sup>a</sup> Alice Coletti,<sup>b,‡</sup> Federico Croci,<sup>a</sup>  
Antonio Macchiarulo,<sup>b</sup> Laura Goracci<sup>a \*</sup>

(1) Equal contribution

\* Corresponding author: [laura.goracci@unipg.it](mailto:laura.goracci@unipg.it)

#### *Affiliations:*

<sup>a</sup> Department of Chemistry, Biology, and Biotechnology, University of Perugia, Via Elce di sotto 8, 06123 Perugia, Italy

<sup>b</sup> Department of Pharmaceutical Sciences, University of Perugia, Via del Liceo 1, 06123 Perugia, Italy

<sup>‡</sup> *present affiliation:* Department of Medicine and Surgery, University of Perugia, Polo Unico Sant'Andrea delle Fratte, Perugia, Italy

## Contents

|                                                          |      |
|----------------------------------------------------------|------|
| Supplementary Table S1                                   | S3   |
| Supplementary Table S2                                   | S5   |
| Synthetic Chemistry Methods                              | S7   |
| Copy of $^1\text{H}$ NMR and $^{13}\text{C}$ NMR spectra | S34  |
| Copy of HRMS spectra                                     | S77  |
| References                                               | S100 |

Supplementary Table S1

| Compound | Structure                                                                                                                                                                                                                                                                                                                                                                                                                                                                                                                                                                                                                                                                    | Predicted pKa <sup>a</sup> |
|----------|------------------------------------------------------------------------------------------------------------------------------------------------------------------------------------------------------------------------------------------------------------------------------------------------------------------------------------------------------------------------------------------------------------------------------------------------------------------------------------------------------------------------------------------------------------------------------------------------------------------------------------------------------------------------------|----------------------------|
| PROTAC-1 | 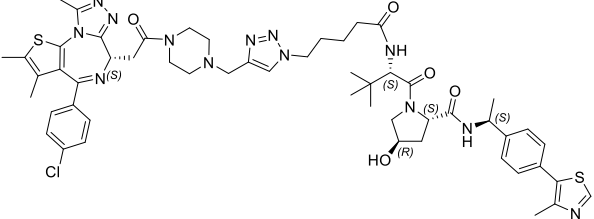 <p>The structure of PROTAC-1 features a central piperazine ring. One nitrogen of the piperazine is connected to a 4-chlorophenyl group. The other nitrogen is connected to a 1,2,4-triazole ring, which is further substituted with a methyl group and a 4-methylthiazole-5-yl group. The piperazine ring is also linked to a 4-methylthiazole-5-yl group via a methylene bridge. The piperazine ring is further substituted with a 4-methylthiazole-5-yl group via a methylene bridge. The piperazine ring is also linked to a 4-methylthiazole-5-yl group via a methylene bridge.</p>   | 4.81                       |
| PROTAC-2 |  <p>The structure of PROTAC-2 features a central piperazine ring. One nitrogen of the piperazine is connected to a 4-fluorophenyl group. The other nitrogen is connected to a 1,2,4-triazole ring, which is further substituted with a methyl group and a 4-methylthiazole-5-yl group. The piperazine ring is also linked to a 4-methylthiazole-5-yl group via a methylene bridge. The piperazine ring is further substituted with a 4-methylthiazole-5-yl group via a methylene bridge. The piperazine ring is also linked to a 4-methylthiazole-5-yl group via a methylene bridge.</p>   | 2.65<br>4.55               |
| PROTAC-3 |  <p>The structure of PROTAC-3 features a central piperazine ring. One nitrogen of the piperazine is connected to a 4-chlorophenyl group. The other nitrogen is connected to a 1,2,4-triazole ring, which is further substituted with a methyl group and a 4-methylthiazole-5-yl group. The piperazine ring is also linked to a 4-methylthiazole-5-yl group via a methylene bridge. The piperazine ring is further substituted with a 4-methylthiazole-5-yl group via a methylene bridge. The piperazine ring is also linked to a 4-methylthiazole-5-yl group via a methylene bridge.</p>  | 2.64<br>5.09               |
| PROTAC-4 |  <p>The structure of PROTAC-4 features a central piperazine ring. One nitrogen of the piperazine is connected to a 4-chlorophenyl group. The other nitrogen is connected to a 1,2,4-triazole ring, which is further substituted with a methyl group and a 4-methylthiazole-5-yl group. The piperazine ring is also linked to a 4-methylthiazole-5-yl group via a methylene bridge. The piperazine ring is further substituted with a 4-methylthiazole-5-yl group via a methylene bridge. The piperazine ring is also linked to a 4-methylthiazole-5-yl group via a methylene bridge.</p> | 4.99                       |
| PROTAC-5 |  <p>The structure of PROTAC-5 features a central piperazine ring. One nitrogen of the piperazine is connected to a 4-chlorophenyl group. The other nitrogen is connected to a 1,2,4-triazole ring, which is further substituted with a methyl group and a 4-methylthiazole-5-yl group. The piperazine ring is also linked to a 4-methylthiazole-5-yl group via a methylene bridge. The piperazine ring is further substituted with a 4-methylthiazole-5-yl group via a methylene bridge. The piperazine ring is also linked to a 4-methylthiazole-5-yl group via a methylene bridge.</p> | 2.53<br>7.14               |
| PROTAC-6 |  <p>The structure of PROTAC-6 features a central piperazine ring. One nitrogen of the piperazine is connected to a 4-chlorophenyl group. The other nitrogen is connected to a 1,2,4-triazole ring, which is further substituted with a methyl group and a 4-methylthiazole-5-yl group. The piperazine ring is also linked to a 4-methylthiazole-5-yl group via a methylene bridge. The piperazine ring is further substituted with a 4-methylthiazole-5-yl group via a methylene bridge. The piperazine ring is also linked to a 4-methylthiazole-5-yl group via a methylene bridge.</p> | 2.65<br>7.18               |

|                  |                                                                                                                                                                                                                                                                                                                                                                                                                                                                                                                                                                                                                                                |              |
|------------------|------------------------------------------------------------------------------------------------------------------------------------------------------------------------------------------------------------------------------------------------------------------------------------------------------------------------------------------------------------------------------------------------------------------------------------------------------------------------------------------------------------------------------------------------------------------------------------------------------------------------------------------------|--------------|
| <b>PROTAC-7</b>  | 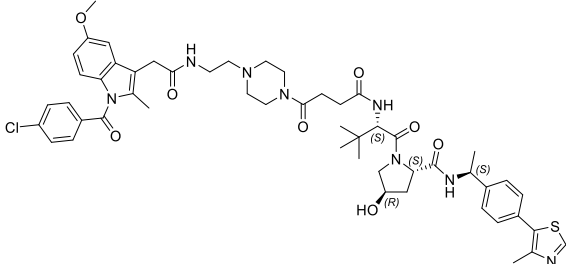 <p>The structure of PROTAC-7 features a central piperazine ring. One nitrogen of the piperazine is connected via a methylene group to a carbonyl group, which is further linked to a 5-methoxy-1H-indolizino[1,2-a]pyridine system. The other nitrogen of the piperazine is connected via a methylene group to another carbonyl group, which is linked to a 2-hydroxy-2-methylpropanoate moiety. This moiety is further connected to a 2-methyl-2-oxoimidazolidin-4-ylidene group, which is linked to a 4-(4-methyl-1,3,4-thiazol-5-yl)phenyl group.</p>    | 2.65<br>6.24 |
| <b>PROTAC-8</b>  |  <p>The structure of PROTAC-8 features a central piperazine ring. One nitrogen of the piperazine is connected via a methylene group to a carbonyl group, which is further linked to a 5-methoxy-1H-indolizino[1,2-a]pyridine system. The other nitrogen of the piperazine is connected via a methylene group to another carbonyl group, which is linked to a 2-hydroxy-2-methylpropanoate moiety. This moiety is further connected to a 2-methyl-2-oxoimidazolidin-4-ylidene group, which is linked to a 4-(4-methyl-1,3,4-thiazol-5-yl)phenyl group.</p>    | 2.23<br>7.87 |
| <b>PROTAC-9</b>  |  <p>The structure of PROTAC-9 features a central piperazine ring. One nitrogen of the piperazine is connected via a methylene group to a carbonyl group, which is further linked to a 5-methoxy-1H-indolizino[1,2-a]pyridine system. The other nitrogen of the piperazine is connected via a methylene group to another carbonyl group, which is linked to a 2-hydroxy-2-methylpropanoate moiety. This moiety is further connected to a 2-methyl-2-oxoimidazolidin-4-ylidene group, which is linked to a 4-(4-methyl-1,3,4-thiazol-5-yl)phenyl group.</p>    | 2.33<br>8.02 |
| <b>PROTAC-10</b> |  <p>The structure of PROTAC-10 features a central piperazine ring. One nitrogen of the piperazine is connected via a methylene group to a carbonyl group, which is further linked to a 5-methoxy-1H-indolizino[1,2-a]pyridine system. The other nitrogen of the piperazine is connected via a methylene group to another carbonyl group, which is linked to a 2-hydroxy-2-methylpropanoate moiety. This moiety is further connected to a 2-methyl-2-oxoimidazolidin-4-ylidene group, which is linked to a 4-(4-methyl-1,3,4-thiazol-5-yl)phenyl group.</p>  | 2.65<br>6.73 |
| <b>PROTAC-11</b> |  <p>The structure of PROTAC-11 features a central piperazine ring. One nitrogen of the piperazine is connected via a methylene group to a carbonyl group, which is further linked to a 5-methoxy-1H-indolizino[1,2-a]pyridine system. The other nitrogen of the piperazine is connected via a methylene group to another carbonyl group, which is linked to a 2-hydroxy-2-methylpropanoate moiety. This moiety is further connected to a 2-methyl-2-oxoimidazolidin-4-ylidene group, which is linked to a 4-(4-methyl-1,3,4-thiazol-5-yl)phenyl group.</p> | 2.68<br>7.47 |

<sup>a</sup> Ionization constant predicted using Marvin plugins [Calculator Plugins were used for structure property prediction and calculation, Marvin v20.11, 2020, ChemAxon (<http://www.chemaxon.com>)]

Supplementary Table S1

| Compound | Structure | Predicted pKa <sup>a</sup> |
|----------|-----------|----------------------------|
| 1        |           | 1.57<br>6.85               |
| 2        |           | 7.06                       |
| 3        |           | 6.70                       |
| 4        |           | 7.05                       |
| 5        |           | 6.25                       |
| 6        |           | 5.89                       |
| 7        |           | 6.71                       |
| 8        |           | 1.57<br>5.22               |
| 9        |           | 5.40                       |
| 10       |           | 4.79                       |

|    |                                                                                      |      |
|----|--------------------------------------------------------------------------------------|------|
| 11 | 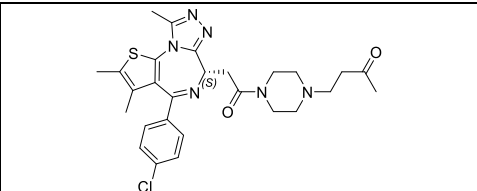   | 6.70 |
| 12 |    | 6.69 |
| 13 |    | 6.80 |
| 14 |    | 7.37 |
| 15 |   | 7.67 |
| 16 |  | 6.21 |
| 17 |  | 6.73 |

<sup>a</sup> Ionization constant predicted using Marvin plugins [Calculator Plugins were used for structure property prediction and calculation, Marvin v20.11, 2020, ChemAxon (<http://www.chemaxon.com>)]

## Supplementary Synthetic Chemistry Methods

### *General*

Unless otherwise noted, starting materials, reagents, and solvents were purchased from commercial suppliers and were used as received without further purification.

Among the four POI ligands, compounds **silmitasertib** and **indomethacin** were purchased by Fluorochem, **JQ1 carboxylic acid (JQ1 c.a.)** derivative was purchased by Ambeed, while intermediate **18** was prepared as reported in the literature.<sup>1</sup> Regarding precursors and PROTACs tested in this work, **PROTAC-2**, **PROTAC-5**, **PROTAC-7**, and **PROTAC-9** were synthesized as already reported in the literature<sup>2</sup>, while for compound **3**<sup>1</sup> a slightly different synthetic procedure than those already present in the literature was applied and thus herein described. Concerning intermediates required for the preparation of tested compounds, compounds **S38**<sup>3</sup>, **S39**<sup>4</sup>, and **S40**<sup>5</sup> were synthesized as already reported in the literature. For compounds **S25**, **S27**, **S35**, **S36**, and **S37** different synthetic procedures than those already reported in the literature were applied and thus herein described.

Reactions were routinely monitored by thin-layer chromatography (TLC) performed on silica gel 60 F254 (layer 0.2 mm) pre-coated aluminium foil (with fluorescent indicator UV254) (Sigma-Aldrich). Developed plates were air-dried and visualized by UV detector ( $\lambda$ : 254/365 nm) and/or by staining and warming with potassium permanganate or ninhydrin. Flash column chromatography was performed on Merck silica gel 60 (mesh 230-400). Automated flash chromatographic purifications were performed using Biotage® Selekt (Cartridge: Sfür Silica HC Duo 5g or 10g). Preparative TLC purification was performed on Merck silica gel 60 F<sub>254</sub> (0.5 mm) pre-coated glass plates (20x20 cm) (Sigma-Aldrich). <sup>1</sup>H NMR and <sup>13</sup>C NMR spectra were recorded at room temperature at 400 and 101 MHz, respectively, on a Bruker Avance 400 spectrometer in the indicated solvent by using TMS or residual solvent peak as internal standard. Chemical shifts are reported in ppm ( $\delta$ ) and the coupling constants (*J*) are given in Hertz (Hz). Peak multiplicities are abbreviated as follows: s (singlet), bs (broad singlet), d (doublet), dd (double doublet), t (triplet), dt

(double triplet), q (quartet), p (pentet), and m (multiplet). High-Resolution Mass Spectroscopy (HRMS) analyses were carried out on Agilent Technologies 6540 UHD Accurate Mass Q-TOF LC-MS system. The purity of all synthesized compounds was confirmed to be >95% by UPLC-MS. The analyses were carried out according to the method listed below. The mobile phase was a mixture of water (solvent A) and acetonitrile (solvent B), both containing formic acid at 0.1%. Method: Acquity UPLC BEH C18 1.7  $\mu\text{m}$  (C18, 150 x 2.1 mm) column at 40° C using a flow rate of 0.65 mL/min in a 10 min gradient elution. Gradient elution was as follows: 99.5:0.5 (A/B) to 5:95 (A/B) over 8 min, 5:95 (A/B) for 2 min, and then reversion back to 99.5:0.5 (A/B) over 0.1 min. The UV detection is an averaged signal from a wavelength of 190 nm to 640 nm and mass spectra are recorded on a mass spectrometer using positive mode electro spray ionization.

***General procedure A: HATU-mediated amidation.***

Under nitrogen atmosphere, to a stirred solution of the appropriate carboxylic acid (1.0 equiv), suitable amine (1.0 equiv) and DIPEA (4.0 equiv) in dry DMF was added HATU (1.25 eq) and the reaction mixture was stirred at room temperature. The mixture was poured in ice-water yielding a precipitate collected by filtration. When no precipitate formed, the mixture was extracted with EA (x3) and the reunited organic phases were washed with water (x3), brine (x3), dried over  $\text{Na}_2\text{SO}_4$ , and evaporated to dryness. The crude was purified as described below.

***General procedure B: Amine Boc-deprotection.***

A solution of 4.0 N HCl in dioxane was added to the appropriate Boc-protected amine and the resulting solution was stirred at room temperature for 2-3 h. The solvent was evaporated to dryness and the residue was triturated with DEE, collected by filtration, and dried *under vacuo*.



### Synthesis of silmitasertib-based derivatives:

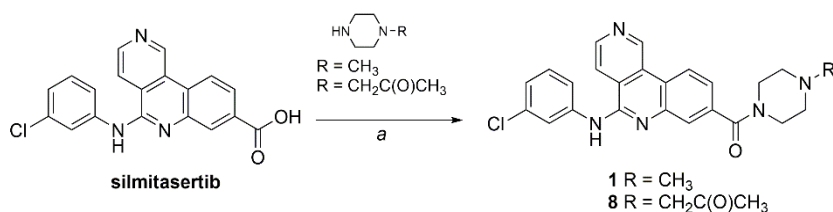

Reagents and conditions: (a) HATU, DIPEA, dry DMF, rt.

### (5-((3-Chlorophenyl)amino)benzo[*c*][2,6]naphthyridin-8-yl)(4-methylpiperazin-1-yl)methanone (1).<sup>6</sup>

General Procedure A (3 h) was followed by using **silmitasertib** (CX-4945) (0.060 g, 0.171 mmol) and 1-methylpiperazine (0.023 mL, 0.205 mmol) to afford the titled compound as white solid (0.026 g, 35% yield) after purification by flash column chromatography on SiO<sub>2</sub> (DCM/MeOH, 96:4). <sup>1</sup>H NMR (400 MHz, DMSO-*d*<sub>6</sub>) δ 10.17 (s, 1H), 9.67 (s, 1H), 8.98 (d, *J* = 5.6 Hz, 1H), 8.83 (d, *J* = 8.4 Hz, 1H), 8.58 (d, *J* = 5.6 Hz, 1H), 8.30 (t, *J* = 2.1 Hz, 1H), 8.15 – 8.07 (m, 1H), 7.70 (d, *J* = 1.6 Hz, 1H), 7.47 (dd, *J* = 8.3, 1.7 Hz, 1H), 7.43 (t, *J* = 8.1 Hz, 1H), 7.13 (ddd, *J* = 8.0, 2.1, 0.8 Hz, 1H), 3.80 – 3.36 (m, 4H), 2.47 – 2.23 (m, 4H), 2.20 (s, 3H); <sup>13</sup>C NMR (101 MHz, DMSO-*d*<sub>6</sub>) δ 168.88, 150.54, 148.01, 147.55, 143.78, 142.33, 137.78, 133.21, 130.58, 127.57, 125.66, 124.03, 123.05 (2C), 122.61, 120.55, 120.15, 119.58, 116.78, 55.22, 54.63, 47.62, 46.07, 41.94. HRMS (ESI) *m/z* [M+H]<sup>+</sup> calcd for C<sub>24</sub>H<sub>22</sub>ClN<sub>5</sub>O 432.15856, found 432.15847. UPLC retention time: 3.377 min.

### 1-(4-(5-((3-Chlorophenyl)amino)benzo[*c*][2,6]naphthyridine-8-carbonyl)piperazin-1-yl)propan-2-one (8).

General Procedure A (2 h) was followed by using **silmitasertib** (CX-4945) (0.060 g, 0.171 mmol) and **26** (0.030 g, 0.171 mmol) to afford the titled compound as white solid (0.026 g, 32% yield) after purification by flash column chromatography on SiO<sub>2</sub> (DCM/MeOH, 96:4). <sup>1</sup>H NMR (400 MHz, DMSO-*d*<sub>6</sub>) δ 10.18 (s, 1H), 9.67 (s, 1H), 8.98 (d, *J* = 5.6 Hz, 1H), 8.83 (d, *J* = 8.3 Hz, 1H), 8.58 (d, *J* = 5.5 Hz, 1H), 8.30 (t, *J* = 2.1 Hz, 1H), 8.10 (ddd, *J* = 8.3, 2.1, 0.8 Hz, 1H), 7.71 (d, *J* = 1.6 Hz, 1H), 7.47 (dd, *J* = 8.3, 1.7 Hz, 1H), 7.43 (t, *J* = 8.1 Hz, 1H), 7.14 (ddd, *J* = 8.0, 2.1, 0.8 Hz, 1H), 3.80 – 3.62 (m, 2H), 3.51 – 3.36 (m, 2H), 3.25 (s, 2H), 2.62 – 2.51 (m, 2H), 2.47 – 2.35 (m,

2H), 2.08 (s, 3H);  $^{13}\text{C}$  NMR (101 MHz,  $\text{DMSO-}d_6$ )  $\delta$  207.03, 168.87, 150.56, 148.03, 147.58, 143.79, 142.34, 137.72, 133.23, 130.59, 127.58, 125.71, 124.05, 123.09, 123.06, 122.63, 120.56, 120.18, 119.59, 116.79, 67.43, 53.24, 52.70, 47.68, 42.02, 28.07. HRMS (ESI)  $m/z$   $[\text{M}+\text{H}]^+$  calcd for  $\text{C}_{26}\text{H}_{24}\text{ClN}_5\text{O}_2$  474.16913, found 474.16951. UPLC retention time: 3.481 min.

### Synthesis of JQ1-based derivatives:

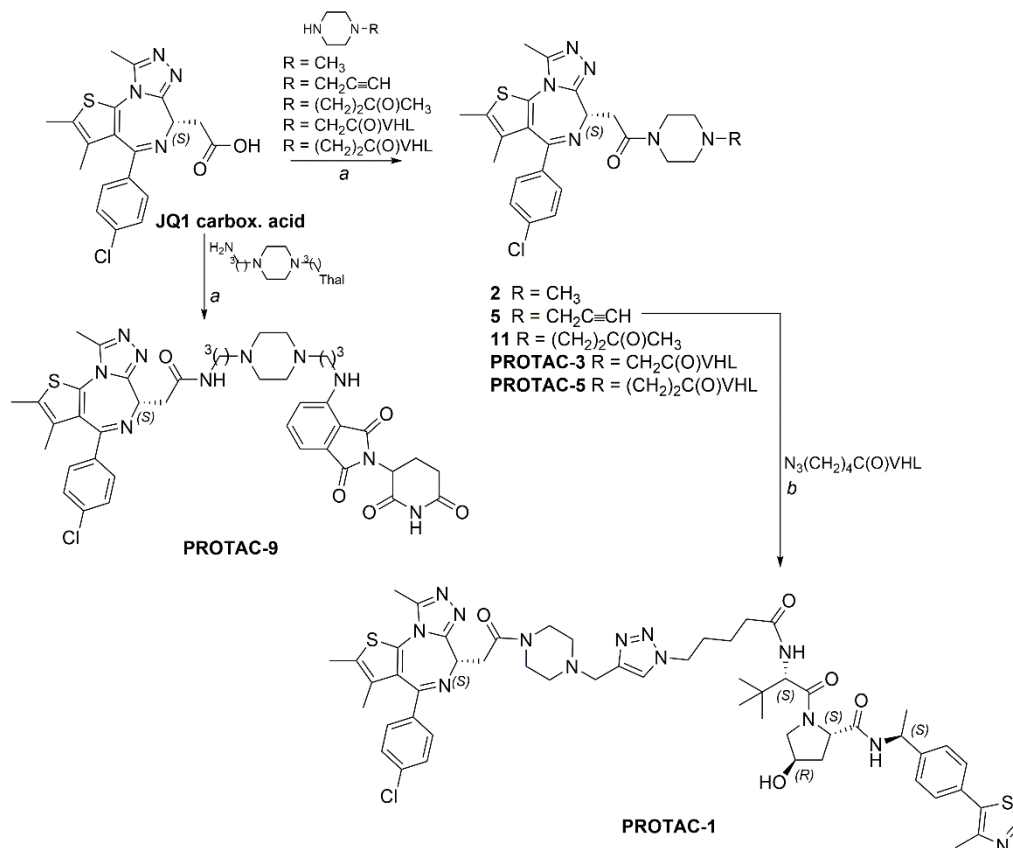

*Reagents and conditions:* (a) HATU, DIPEA, dry DMF, rt; (b)  $\text{CuSO}_4$ , sodium ascorbate,  $\text{DMF}/t\text{BuOH}/\text{H}_2\text{O}$  (1:1:1), rt. VHL: VHL ligand; Thal: thalidomide.

### (S)-2-(4-(4-Chlorophenyl)-2,3,9-trimethyl-6H-thieno[3,2-f][1,2,4]triazolo[4,3-a][1,4]diazepin-6-yl)-1-(4-methylpiperazin-1-yl)ethan-1-one (2).

General Procedure A (3 h) was followed by using **JQ1 c.a.** (0.040 g, 0.099 mmol) and 1-methylpiperazine (0.011 mL, 0.099 mmol) to afford the titled compound as white solid (0.020 g, 41% yield) after purification by automated flash chromatography on  $\text{SiO}_2$  cartridge ( $\text{DCM}/\text{MeOH}$ , 93:7).  $^1\text{H}$  NMR (400 MHz,  $\text{CDCl}_3$ )  $\delta$  7.40 (d,  $J = 8.5$  Hz, 2H), 7.33 (d,  $J = 8.3$  Hz, 2H), 4.79 (t,  $J =$

6.8 Hz, 1H), 4.10 – 3.40 (m, 6H), 2.95 – 2.27 (m, 13H), 1.68 (s, 3H); <sup>13</sup>C NMR (101 MHz, CDCl<sub>3</sub>) δ 169.09, 163.81, 155.85, 149.89, 136.75, 136.73, 132.18, 130.95, 130.71, 130.53, 129.83 (2C), 128.72 (2C), 54.56, 54.34, 45.46, 45.13, 41.08, 35.07, 29.70, 14.39, 13.09, 11.85. HRMS (ESI) *m/z* [M+H]<sup>+</sup> calcd for C<sub>24</sub>H<sub>27</sub>ClN<sub>6</sub>OS 483.17283, found 483.17309. UPLC retention time: 3.657 min.

**(S)-2-(4-(4-Chlorophenyl)-2,3,9-trimethyl-6H-thieno[3,2-*f*][1,2,4]triazolo[4,3-*a*][1,4]diazepin-6-yl)-1-(4-(prop-2-yn-1-yl)piperazin-1-yl)ethan-1-one (5).**

General Procedure A (overnight) was followed by using **JQ1 c.a.** (0.050 g, 0.125 mmol) and **S30** (0.024 mg, 0.125 mmol) to afford the titled compound as white solid (0.052 g, 82% yield) after purification by flash column chromatography on SiO<sub>2</sub> (DCM/MeOH, 95:5). <sup>1</sup>H NMR (400 MHz, CDCl<sub>3</sub>) δ 7.40 (d, *J* = 8.5 Hz, 2H), 7.32 (d, *J* = 8.6 Hz, 2H), 4.79 (t, *J* = 6.5 Hz, 1H), 3.93 – 3.57 (m, 6H), 3.40 (s, 2H), 2.80 – 2.52 (m, 7H), 2.40 (s, 3H), 2.31 (s, 1H), 1.67 (s, 3H). HRMS (ESI) *m/z* [M+H]<sup>+</sup> calcd for C<sub>26</sub>H<sub>27</sub>ClN<sub>6</sub>OS 507.17338, found 507.17365. UPLC retention time: 4.175 min

**(S)-4-(4-(2-(4-(4-Chlorophenyl)-2,3,9-trimethyl-6H-thieno[3,2-*f*][1,2,4]triazolo[4,3-*a*][1,4]diazepin-6-yl)acetyl)piperazin-1-yl)butan-2-one (11).**

General Procedure A (3 h) was followed by using **JQ1 c.a.** (0.040 g, 0.099 mmol) and **S28** (0.019 g, 0.099 mmol) to afford the titled compound as white solid (0.018 g, 35% yield) after purification by automated flash chromatography on SiO<sub>2</sub> cartridge (DCM/MeOH, 94:6). <sup>1</sup>H NMR (400 MHz, CDCl<sub>3</sub>) δ 7.40 (d, *J* = 7.6 Hz, 2H), 7.33 (d, *J* = 7.6 Hz, 2H), 4.84 – 4.72 (m, 1H), 4.20 – 3.35 (m, 7H), 3.21 – 2.30 (m, *J* = 92.6 Hz, 13H), 2.21 (s, 3H), 1.67 (s, 3H). HRMS (ESI) *m/z* [M+Na]<sup>+</sup> calcd for C<sub>27</sub>H<sub>31</sub>ClN<sub>6</sub>O<sub>2</sub>S 561.18099, found 561.18112. UPLC retention time: 3.762 min.

**(2S,4R)-1-((S)-2-(2-(4-(2-((S)-4-(4-chlorophenyl)-2,3,9-trimethyl-6H-thieno[3,2-*f*][1,2,4]triazolo[4,3-*a*][1,4]diazepin-6-yl)acetyl)piperazin-1-yl)acetamido)-3,3-dimethylbutanoyl)-4-hydroxy-*N*-((S)-1-(4-(4-methylthiazol-5-yl)phenyl)ethyl)pyrrolidine-2-carboxamide (PROTAC-3).**

General Procedure A (3 h) was followed by using **JQ1 c.a.** (0.037 g, 0.061 mmol) and (2S,4R)-1-((S)-3,3-dimethyl-2-(2-(piperazin-1-yl)acetamido)-butanoyl)-4-hydroxy-*N*-((S)-1-(4-(4-

methylthiazol-5-yl)phenyl)-ethyl)pyrrolidine-2-carboxamide hydrochloride<sup>2</sup> (0.024 mg, 0.061 mmol) to afford the titled compound as white solid (0.020 g, 36% yield) after purification by automated flash column chromatography on SiO<sub>2</sub> (DCM/MeOH, 95:5). <sup>1</sup>H NMR (400 MHz, DMSO-*d*<sub>6</sub>) δ 8.98 (s, 1H), 8.44 (d, *J* = 7.6 Hz, 1H), 7.78 (d, *J* = 9.6 Hz, 1H), 7.60 – 7.24 (m, 8H), 5.13 (d, *J* = 3.4 Hz, 1H), 4.95 – 4.86 (m, 1H), 4.61 – 4.50 (m, 2H), 4.45 (t, *J* = 8.2 Hz, 1H), 4.29 (bs, 1H), 3.81 – 3.36 (m, 10H), 3.19 – 2.96 (m, 3H), 2.60 (s, 4H), 2.48 – 2.39 (m, 6H), 2.11 – 2.00 (m, 1H), 1.82 – 1.73 (m, 1H), 1.63 (s, 3H), 1.38 (d, *J* = 7.1 Hz, 3H), 0.96 (s, 9H); <sup>13</sup>C NMR (101 MHz, DMSO-*d*<sub>6</sub>) δ 170.94, 169.66, 168.93, 168.77, 163.33, 155.72, 150.24, 148.22, 145.26, 137.23, 135.66, 132.68, 131.58, 131.15, 130.64 (2C), 130.35, 130.15, 130.10, 129.36, 129.30 (2C), 128.96 (2C), 126.78 (2C), 69.23, 60.93, 59.00, 56.98, 56.34, 54.62, 53.44, 53.04, 48.24, 45.56, 41.77, 38.22, 36.18, 35.20, 26.79 (3C), 22.98, 16.46, 14.50, 13.16, 11.75. HRMS (ESI) *m/z* [M+H]<sup>+</sup> calcd for C<sub>48</sub>H<sub>57</sub>ClN<sub>10</sub>O<sub>5</sub>S<sub>2</sub> 953.37161, found 953.37249 UPLC retention time: 4.69 min

**(2*S*,4*R*)-1-((*S*)-2-(5-(4-((4-(2-((*S*)-4-(4-Chlorophenyl)-2,3,9-trimethyl-6*H*-thieno[3,2-*f*][1,2,4]triazolo[4,3-*a*][1,4]diazepin-6-yl)acetyl)piperazin-1-yl)methyl)-1*H*-1,2,3-triazol-1-yl)pentanamido)-3,3-dimethylbutanoyl)-4-hydroxy-*N*-((*S*)-1-(4-(4-methylthiazol-5-yl)phenyl)ethyl)pyrrolidine-2-carboxamide (PROTAC-1).**

To the solution of **5** (0.044 g, 0.079 mmol) and (2*S*,4*R*)-1-((*S*)-2-(2-azidoacetamido)-3,3-dimethylbutanoyl)-4-hydroxy-*N*-((*S*)-1-(4-(4-methylthiazol-5-yl)phenyl)ethyl)pyrrolidine-2-carboxamide<sup>2</sup> (0.040 g, 0.079 mmol) in a mixture of DMF/*t*BuOH/H<sub>2</sub>O (1:1:1) (3.0 mL), CuSO<sub>4</sub> (0.010 g, 0.039 mmol) and sodium ascorbate (0.047 g, 0.237 mmol) were added and the reaction mixture was stirred at room temperature for 3 h. Then, the reaction mixture was poured in ice-water yielding a white precipitate which was collected by filtration and purified by flash column chromatography on SiO<sub>2</sub> (DCM/MeOH, 93:7 to 90:10) to give the titled compound (0.030 g, 35% yield) as white solid. <sup>1</sup>H NMR (400 MHz, DMSO-*d*<sub>6</sub>) δ 8.98 (s, 1H), 8.37 (d, *J* = 7.7 Hz, 1H), 8.01 (s, 1H), 7.86 (d, *J* = 9.1 Hz, 1H), 7.56 – 7.34 (m, 8H), 5.10 (d, *J* = 3.1 Hz, 1H), 4.95 – 4.88 (m, 1H), 4.60 – 4.48 (m, 2H), 4.42 (t, *J* = 7.9 Hz, 1H), 4.34 (t, *J* = 6.6 Hz, 2H), 4.27 (bs, 1H), 3.73 – 3.36 (m,

9H), 2.59 (s, 3H), 2.49– 2.08 (m, 12H), 2.04 – 1.94 (m, 1H), 1.88 – 1.72 (m, 3H), 1.62 (s, 3H), 1.53 – 1.31 (m, 5H), 0.92 (s, 9H); <sup>13</sup>C NMR (101 MHz, DMSO-*d*<sub>6</sub>) δ 172.10, 171.07, 170.02, 168.54, 163.32, 155.72, 150.22, 148.22, 145.12, 143.46, 137.22, 135.65, 132.66, 131.58, 131.13, 130.62 (2C), 130.34, 130.15, 130.09, 129.29 (2C), 128.94 (2C), 126.84 (2C), 126.71, 124.19, 69.22, 59.00, 56.87, 56.75, 54.62, 52.96(2C), 52.50, 49.41, 48.15, 45.41, 41.60, 38.19, 35.64, 35.20, 34.55, 29.79, 26.90 (3C), 22.91, 22.81, 16.45, 14.49, 13.16, 11.75. HRMS (ESI) *m/z* [M+H]<sup>+</sup> calcd for C<sub>54</sub>H<sub>66</sub>ClN<sub>13</sub>O<sub>5</sub>S<sub>2</sub> 1076.45126, found 1076.45214. UPLC retention time: 4.831 min.

### Synthesis of olaparib-based derivatives:

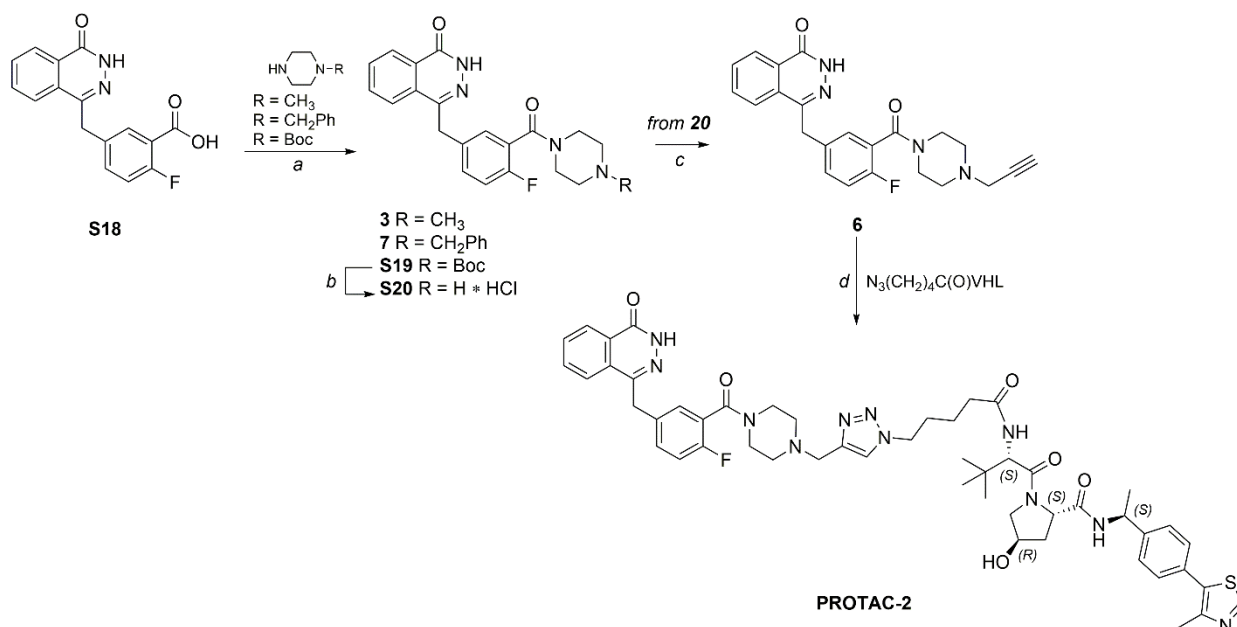

*Reagents and conditions:* (a) HATU, DIPEA, dry DMF, rt; (b) HCl 4N in dioxane, rt; (c) 3-bromoprop-1-yne, K<sub>2</sub>CO<sub>3</sub>, KI, ACN, reflux; (d) CuSO<sub>4</sub>, sodium ascorbate, DMF/*t*BuOH/H<sub>2</sub>O (1:1:1), rt. VHL: VHL ligand.

### 4-(4-Fluoro-3-(4-methylpiperazine-1-carbonyl)benzyl)phthalazin-1(2H)-one (3).<sup>1</sup>

In particular, General Procedure A (18 h) was followed by using **S18**<sup>1</sup> (0.070 g, 0.234 mmol) and 1-methylpiperazine (0.031 mL, 0.281 mmol) to afford the titled compound as white solid (0.037 g, 42% yield) after purification by automated flash chromatography on SiO<sub>2</sub> cartridge (DCM/MeOH, 94:6). <sup>1</sup>H NMR (400 MHz, DMSO-*d*<sub>6</sub>) δ 12.59 (s, 1H), 8.26 (d, *J* = 7.7 Hz, 1H), 7.96 (d, *J* = 8.2 Hz,

1H), 7.88 (t,  $J = 7.6$  Hz, 1H), 7.83 (t,  $J = 7.5$  Hz, 1H), 7.45 – 7.38 (m, 1H), 7.33 – 7.29 (m, 1H), 7.21 (t,  $J = 9.0$  Hz, 1H), 4.32 (s, 2H), 3.64 – 3.54 (m, 2H), 3.15 – 3.11 (m, 2H), 2.34–2.28 (m, 2H), 2.19 – 2.13 (m, 5H);  $^{13}\text{C}$  NMR (101 MHz, DMSO- $d_6$ )  $\delta$  164.21, 159.84, 156.77 (d,  $J = 244.4$  Hz), 145.37, 135.28 (d,  $J = 3.3$  Hz), 133.96, 132.05, 131.95, 129.53, 129.19 (d,  $J = 3.9$  Hz), 128.36, 126.54, 125.95, 124.33 (d,  $J = 18.5$  Hz), 116.35 (d,  $J = 21.7$  Hz), 55.05, 54.62, 46.90, 46.01, 41.65, 36.85. HRMS  $m/z$   $[\text{M}+\text{H}]^+$  calcd for  $\text{C}_{21}\text{H}_{21}\text{FN}_4\text{O}_2$  381.17213, found 381.17254. UPLC retention time: 2.371 min.

**4-(3-(4-Benzylpiperazine-1-carbonyl)-4-fluorobenzyl)phthalazin-1(2H)-one (7).**

General Procedure A (3 h) was followed by using 2-fluoro-5-((4-oxo-3,4-dihydrophthalazin-1-yl)methyl)benzoic acid<sup>1</sup> (0.078 g, 0.263 mmol) and **S32** (0.056 g, 0.263 mmol) to afford the titled compound as white solid (0.040 g, 33% yield) after purification by automated flash chromatography on  $\text{SiO}_2$  cartridge (DCM/MeOH, 95:5).  $^1\text{H}$  NMR (400 MHz, DMSO- $d_6$ )  $\delta$  12.60 (s, 1H), 8.26 (d,  $J = 7.8$  Hz, 1H), 7.96 (d,  $J = 7.8$  Hz, 1H), 7.88 (t,  $J = 7.5$  Hz, 1H), 7.81 (t,  $J = 7.5$  Hz, 1H), 7.46 – 7.38 (m, 1H), 7.38 – 7.16 (m, 7H), 4.33 (s, 2H), 3.68 – 3.55 (m, 2H), 3.48 (s, 2H), 3.19 – 3.11 (m, 2H), 2.45 – 2.35 (m, 2H), 2.29 – 2.19 (m, 2H);  $^{13}\text{C}$  NMR (101 MHz, DMSO- $d_6$ )  $\delta$  164.18, 159.83, 156.79 (d,  $J = 244.5$  Hz), 145.35, 138.17, 135.26 (d,  $J = 3.2$  Hz), 133.94, 132.02, 131.97, 129.53, 129.38 (2C), 129.20 (d,  $J = 3.8$  Hz), 128.69 (2C), 128.36, 127.53, 126.54, 125.95, 124.29 (d,  $J = 18.5$  Hz), 116.36 (d,  $J = 21.6$  Hz), 62.24, 53.13, 52.58, 47.02, 41.80, 36.86. HRMS  $m/z$   $[\text{M}+\text{H}]^+$  calcd for  $\text{C}_{27}\text{H}_{25}\text{FN}_4\text{O}_2$  457.20343, found 457.20332. UPLC retention time: 3.107 min.

## Synthesis of indomethacin-based derivatives:

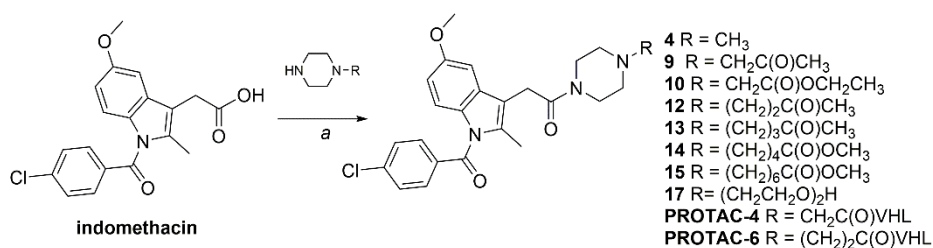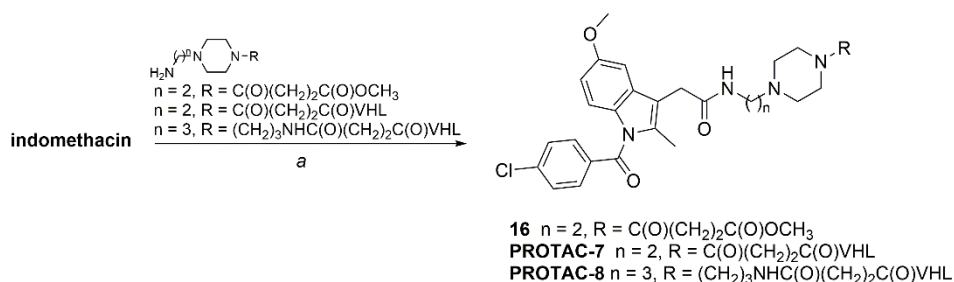

Reagents and conditions: (a) HATU, DIPEA, dry DMF, rt. VHL: VHL ligand.

### 2-(1-(4-Chlorobenzoyl)-5-methoxy-2-methyl-1H-indol-3-yl)-1-(4-methylpiperazin-1-yl)ethan-1-one (4).

General Procedure A (4 h) was followed by using **indomethacin** (0.040 g, 0.112 mmol) and *N*-methyl piperazine (0.012 mL, 0.112 mmol) to afford the titled compound as yellow powder (0.021 g, 59% yield) after purification by automated flash chromatography on SiO<sub>2</sub> cartridge (DCM:MeOH, 97:3 to 95:5). <sup>1</sup>H NMR (400 MHz, CDCl<sub>3</sub>) δ 7.66 (d, *J* = 8.5 Hz, 2H), 7.47 (d, *J* = 8.5 Hz, 2H), 6.97 (d, *J* = 2.4 Hz, 1H), 6.82 (d, *J* = 9.0 Hz, 1H), 6.66 (dd, *J* = 9.0, 2.5 Hz, 1H), 3.89 – 3.57 (m, 9H), 2.61 – 2.27 (m, 10H); <sup>13</sup>C NMR (101 MHz, CDCl<sub>3</sub>) δ 168.65, 168.29, 156.03, 139.29, 135.20, 133.91, 131.21 (2C), 130.85, 130.70, 129.13 (2C), 114.89, 113.31, 111.54, 101.52, 55.75, 54.95, 54.69, 45.94, 45.72, 41.86, 30.20, 13.47. HRMS (ESI) *m/z* [M+H]<sup>+</sup> calculated for C<sub>24</sub>H<sub>26</sub>ClN<sub>3</sub>O<sub>3</sub> 440.17355, found 440.17403. UPLC retention time: 4.068 min.

### 1-(4-(2-(1-(4-Chlorobenzoyl)-5-methoxy-2-methyl-1H-indol-3-yl)acetyl)piperazin-1-yl)propan-2-one (9).

General Procedure A (4 h) was followed by using **indomethacin** (0.100 g, 0.280 mmol) and **S26** (0.050 g, 0.280 mmol) to afford the titled compound as yellow powder (0.021 g, 16% yield) after purification by automated reverse-phase flash chromatography on C18 silica gel cartridge

(H<sub>2</sub>O:ACN, from 50:50 to 100%). <sup>1</sup>H NMR (400 MHz, CDCl<sub>3</sub>) δ 7.66 (d, *J* = 8.4 Hz, 2H), 7.47 (d, *J* = 8.4 Hz, 2H), 6.97 (d, *J* = 2.3 Hz, 1H), 6.82 (d, *J* = 9.0 Hz, 1H), 6.65 (dd, *J* = 9.0, 2.4 Hz, 1H), 3.91 – 3.68 (m, 7H), 3.68 – 3.56 (m, 2H), 3.28 (s, 2H), 2.68 – 2.43 (m, 4H), 2.37 (s, 3H), 2.15 (s, 3H); <sup>13</sup>C NMR (101 MHz, CDCl<sub>3</sub>) δ 212.46, 168.66, 168.27, 156.05, 139.35, 135.24, 133.81, 131.21 (2C), 130.82, 130.51, 129.15 (2C), 114.94, 112.94, 111.61, 101.41, 63.01, 55.76, 52.56 (2C), 45.06, 41.21, 30.30, 27.99, 13.47. HRMS (ESI) *m/z* [M + H]<sup>+</sup> calcd for C<sub>26</sub>H<sub>28</sub>ClN<sub>3</sub>O<sub>4</sub> 482.18411, found 482.18376. UPLC retention time: 4.22 min.

**Ethyl 2-(4-(2-(1-(4-chlorobenzoyl)-5-methoxy-2-methyl-1*H*-indol-3-yl)acetyl)piperazin-1-yl)acetate (10).**

General Procedure A (3 h) was followed by using **indomethacin** (0.50 g, 0.139 mmol) and **S38** (0.030 g, 0.139 mmol) to afford the titled compound as white solid (0.033 g, 46% yield) after purification by flash column chromatography on SiO<sub>2</sub> (DCM:MeOH, 98:2) followed by preparative TLC eluting with DCM:MeOH 95:5. <sup>1</sup>H NMR (400 MHz, CDCl<sub>3</sub>) δ 7.65 (d, *J* = 8.3 Hz, 2H), 7.46 (d, *J* = 8.3 Hz, 2H), 6.97 (d, *J* = 2.4 Hz, 1H), 6.82 (d, *J* = 9.0 Hz, 1H), 6.64 (dd, *J* = 9.0, 2.4 Hz, 1H), 4.16 (q, *J* = 7.1 Hz, 2H), 3.81 (s, 3H), 3.75 – 3.65 (m, 4H), 3.63 – 3.52 (m, 2H), 3.19 (s, 2H), 2.63 – 2.41 (m, 4H), 2.36 (s, 3H), 1.25 (t, *J* = 7.1 Hz, 3H); <sup>13</sup>C NMR (101 MHz, CDCl<sub>3</sub>) δ 169.72, 168.63, 168.26, 156.02, 139.25, 135.15, 133.89, 131.19 (2C), 130.83, 130.62, 129.12 (2C), 114.90, 113.21, 111.56, 101.45, 60.85, 58.90, 55.73, 52.61, 52.47, 45.65, 41.76, 30.26, 14.21, 13.47. HRMS *m/z* [M+H]<sup>+</sup> calcd for C<sub>27</sub>H<sub>30</sub>ClN<sub>3</sub>O<sub>5</sub> 512.19468, found 512.19445. UPLC retention time: 4.821min.

**4-(4-(2-(1-(4-Chlorobenzoyl)-5-methoxy-2-methyl-1*H*-indol-3-yl)acetyl)piperazin-1-yl)butan-2-one (12).**

General Procedure A (4 h) was followed by using **indomethacin** (0.111 g, 0.311 mmol) and **S28** (0.060 g, 0.311 mmol) to afford the titled compound as white solid (0.025 g, 16% yield) after purification by flash column chromatography on SiO<sub>2</sub> (DCM/Acetone/MeOH, 88:10:2). <sup>1</sup>H NMR (400 MHz, CDCl<sub>3</sub>) δ 7.65 (d, *J* = 8.5 Hz, 2H), 7.46 (d, *J* = 8.5 Hz, 2H), 6.96 (d, *J* = 2.4 Hz, 1H),



6.81 (d,  $J = 9.0$  Hz, 1H), 6.64 (dd,  $J = 9.0, 2.5$  Hz, 1H), 3.81 (s, 3H), 3.69 (s, 2H), 3.67 – 3.60 (m, 2H), 3.56 – 3.44 (m, 2H), 2.73 – 2.52 (m, 4H), 2.45 – 2.27 (m, 7H), 2.15 (s, 3H);  $^{13}\text{C}$  NMR (101 MHz,  $\text{CDCl}_3$ )  $\delta$  207.37, 168.59, 168.25, 156.00, 139.27, 135.15, 133.89, 131.19 (2C), 130.82, 130.65, 129.12 (2C), 114.87, 113.27, 111.51, 101.52, 55.73, 53.08, 52.72, 52.44, 45.80, 41.90, 41.07, 30.25, 30.12, 13.46. HRMS  $m/z$   $[\text{M}+\text{H}]^+$  calcd for  $\text{C}_{27}\text{H}_{30}\text{ClN}_3\text{O}_4$  496.19976, found 496.19972. UPLC retention time: 4.18 min.

**5-(4-(2-(1-(4-Chlorobenzoyl)-5-methoxy-2-methyl-1*H*-indol-3-yl)acetyl)piperazin-1-yl)pentan-2-one (13).**

General Procedure A (16 h) was followed by using **indomethacin** (0.219 g, 0.612 mmol) and **S34** (0.118 g, 0.612 mmol) to afford the titled compound as yellowish solid (0.075 g, 24% yield) after purification by automated flash column chromatography on  $\text{SiO}_2$  cartridge (DCM:MeOH, from 99:1 to 90:10).  $^1\text{H}$  NMR (400 MHz,  $\text{CDCl}_3$ )  $\delta$  7.69 – 7.62 (m, 2H), 7.50 – 7.43 (m, 2H), 6.97 (d,  $J = 2.4$  Hz, 1H), 6.82 (d,  $J = 9.0$  Hz, 1H), 6.65 (dd,  $J = 9.0, 2.5$  Hz, 1H), 3.82 (s, 3H), 3.70 (s, 2H), 3.67 – 3.60 (m, 2H), 3.55 – 3.45 (m, 2H), 2.46 (t,  $J = 7.1$  Hz, 2H), 2.43 – 2.26 (m, 9H), 2.15 (s, 3H), 1.81 – 1.71 (m, 2H);  $^{13}\text{C}$  NMR (101 MHz,  $\text{CDCl}_3$ )  $\delta$  208.41, 168.62, 168.28, 156.02, 139.28, 135.17, 133.92, 131.21 (2C), 130.85, 130.69, 129.13 (2C), 114.89, 113.31, 111.54, 101.51, 57.42, 55.75, 52.92, 52.86, 45.78, 41.91, 41.15, 30.24, 30.22, 20.70, 13.48. HRMS  $m/z$   $[\text{M}+\text{H}]^+$  calcd for  $\text{C}_{28}\text{H}_{32}\text{ClN}_3\text{O}_4$  510.21541, found 510.21543. UPLC retention time: 4.21 min.

**Methyl 5-(4-(2-(1-(4-chlorobenzoyl)-5-methoxy-2-methyl-1*H*-indol-3-yl)acetyl)piperazin-1-yl)pentanoate (14).**

General Procedure A (3 h) was followed by using **indomethacin** (0.50 g, 0.139 mmol) and **S39** (0.038 g, 0.139 mmol) to afford the titled compound as white solid (0.037 g, 49% yield) after purification by flash column chromatography on  $\text{SiO}_2$  (DCM:MeOH, 98:2).  $^1\text{H}$  NMR (400 MHz,  $\text{CDCl}_3$ )  $\delta$  7.68 – 7.63 (m, 2H), 7.49 – 7.44 (m, 2H), 6.98 (d,  $J = 2.5$  Hz, 1H), 6.83 (d,  $J = 9.0$  Hz, 1H), 6.65 (dd,  $J = 9.0, 2.5$  Hz, 1H), 3.82 (s, 3H), 3.71 (s, 2H), 3.69 – 3.59 (m, 5H), 3.54 – 3.48 (m, 2H), 2.44 – 2.24 (m, 11H), 1.69 – 1.61 (m, 2H), 1.52 – 1.45 (m, 2H);  $^{13}\text{C}$  NMR (101 MHz,  $\text{CDCl}_3$ )

$\delta$  173.93, 168.58, 168.25, 156.00, 139.24, 135.13, 133.93, 131.19 (2C), 130.83, 130.70, 129.11(2C), 114.87, 113.37, 111.52, 101.51, 57.88, 55.73, 53.18, 52.85, 51.53, 45.90, 42.00, 33.80, 30.21, 26.16, 22.74, 13.48. HRMS  $m/z$   $[M+Na]^+$  calcd for  $C_{29}H_{34}ClN_3O_5$  562.20792, found 562.20841. UPLC retention time: 4.479 min.

**Methyl 7-(4-(2-(1-(4-chlorobenzoyl)-5-methoxy-2-methyl-1*H*-indol-3-yl)acetyl)piperazin-1-yl)heptanoate (15).**

General Procedure A (3 h) was followed by using **indomethacin** (0.50 g, 0.139 mmol) and **S40** (0.042 g, 0.139 mmol) to afford the titled compound as white solid (0.047 g, 59% yield) after purification by flash column chromatography on  $SiO_2$  (DCM:MeOH, 98:2).  $^1H$  NMR (400 MHz,  $CDCl_3$ )  $\delta$  7.65 (d,  $J = 8.4$  Hz, 2H), 7.46 (d,  $J = 8.4$  Hz, 2H), 6.97 (d,  $J = 2.4$  Hz, 1H), 6.82 (d,  $J = 9.0$  Hz, 1H), 6.64 (dd,  $J = 9.0, 2.5$  Hz, 1H), 3.81 (s, 3H), 3.77 – 3.58 (m, 7H), 3.56 – 3.45 (m, 2H), 2.46 – 2.19 (m, 11H), 1.68 – 1.55 (m, 2H), 1.53 – 1.39 (m, 2H), 1.37 – 1.24 (m, 4H).  $^{13}C$  NMR (101 MHz,  $CDCl_3$ )  $\delta$  174.18, 168.57, 168.26, 156.00, 139.24, 135.14, 133.93, 131.19 (2C), 130.84, 130.71, 129.11 (2C), 114.87, 113.39, 111.52, 101.51, 58.40, 55.74, 53.26, 52.91, 51.48, 45.93, 42.02, 33.99, 30.22, 29.00, 27.08, 26.58, 24.84, 13.48. HRMS  $m/z$   $[M+H]^+$  calcd for  $C_{31}H_{38}ClN_3O_5$  568.25728, found 568.25706. UPLC retention time: 4.780 min.

**2-(1-(4-Chlorobenzoyl)-5-methoxy-2-methyl-1*H*-indol-3-yl)-1-(4-(2-(2-hydroxyethoxy)ethyl)piperazin-1-yl)ethan-1-one (17).**

General Procedure A (3 h) was followed by using **indomethacin** (0.060 g, 0.168 mmol) and 2-(2-(piperazin-1-yl)ethoxy)ethan-1-ol (0.029 g, 0.168 mmol) to afford the titled compound as clear yellow oil (0.043 g, 50% yield) after purification by flash column chromatography on  $SiO_2$  (DCM/MeOH, 97:3).  $^1H$  NMR (400 MHz,  $CDCl_3$ )  $\delta$  7.71 – 7.60 (m, 2H), 7.53 – 7.41 (m, 2H), 6.96 (d,  $J = 2.4$  Hz, 1H), 6.82 (d,  $J = 9.0$  Hz, 1H), 6.64 (dd,  $J = 9.0, 2.5$  Hz, 1H), 3.81 (s, 3H), 3.73 – 3.52 (m, 12H), 2.57 (t,  $J = 5.3$  Hz, 2H), 2.54 – 2.47 (m, 2H), 2.46 – 2.39 (m, 2H), 2.36 (s, 3H);  $^{13}C$  NMR (101 MHz,  $CDCl_3$ )  $\delta$  168.61, 168.28, 156.03, 139.29, 135.18, 133.89, 131.21 (2C), 130.84, 130.66, 129.13 (2C), 114.88, 113.24, 111.58, 101.50, 72.36, 67.56, 61.95, 57.70, 55.75, 53.27, 52.97, 45.54, 41.65,

30.22, 13.46. HRMS  $m/z$   $[M+H]^+$  calcd for  $C_{27}H_{32}ClN_3O_5$  514.21033, found 514. 20989. UPLC retention time: 4.013 min.

**(2*S*,4*R*)-1-((*S*)-2-(2-(4-(2-(1-(4-chlorobenzoyl)-5-methoxy-2-methyl-1*H*-indol-3-yl)acetyl)piperazin-1-yl)acetamido)-3,3-dimethylbutanoyl)-4-hydroxy-*N*-((*S*)-1-(4-(thiazol-5-yl)phenyl)ethyl)pyrrolidine-2-carboxamide (PROTAC-4).**

General Procedure A (18 h) was followed by using **indomethacin** (0.041 g, 0.115 mmol) and (2*S*,4*R*)-1-((*S*)-3,3-dimethyl-2-(2-(piperazin-1-yl)acetamido)butanoyl)-4-hydroxy-*N*-((*S*)-1-(4-(4-methylthiazol-5-yl)phenyl)ethyl)pyrrolidine-2-carboxamide hydrochloride <sup>2</sup> (0.045 g, 0.070 mmol) to afford the titled compound as yellow solid (0.020 g, 19 % yield) after purification by flash column chromatography on  $SiO_2$  (DCM/Acetone/MeOH, 76:20:4). <sup>1</sup>H NMR (400 MHz,  $CDCl_3$ )  $\delta$  8.67 (s, 1H), 7.72 (d,  $J = 8.4$  Hz, 1H), 7.66 (d,  $J = 8.3$  Hz, 2H), 7.47 (d,  $J = 8.4$  Hz, 2H), 7.43 – 7.31 (m, 5H), 6.96 (d,  $J = 2.1$  Hz, 1H), 6.79 (d,  $J = 9.0$  Hz, 1H), 6.68 – 6.62 (m, 1H), 5.12 – 5.04 (m, 1H), 4.73 (t,  $J = 7.8$  Hz, 1H), 4.55 – 4.43 (m, 2H), 4.13 (d,  $J = 11.7$  Hz, 1H), 3.90 – 3.76 (m, 4H), 3.71 (s, 2H), 3.65 – 3.50 (m, 4H), 3.01 (s, 2H), 2.61 – 2.43 (m, 7H), 2.43 – 2.32 (m, 4H), 2.11 – 2.00 (m, 1H), 1.47 (d,  $J = 6.8$  Hz, 3H), 1.05 (s, 9H); <sup>13</sup>C NMR (101 MHz,  $CDCl_3$ )  $\delta$  171.76, 169.47, 168.77 (2C), 168.31, 156.02, 150.31, 148.52, 143.07, 139.40, 135.31, 133.79, 131.54, 131.24 (2C), 130.95, 130.84, 130.60, 129.58 (2C), 129.17 (2C), 126.44 (2C), 114.92, 113.00, 111.47, 101.61, 70.11, 58.13 (2C), 56.62, 55.77, 53.79, 53.15 (2C), 48.86, 35.32, 34.70, 31.93, 30.25, 29.71, 26.58 (3C), 22.22, 16.11, 13.44. HRMS (ESI)  $m/z$   $[M + H]^+$  calcd for  $C_{48}H_{56}ClN_7O_7S$  910.37232, found 910.37300. UPLC retention time: 5.27.

**(2*S*,4*R*)-1-((*S*)-2-(3-(4-(2-(1-(4-Chlorobenzoyl)-5-methoxy-2-methyl-1*H*-indol-3-yl)acetyl)piperazin-1-yl)propanamido)-3,3-dimethylbutanoyl)-4-hydroxy-*N*-((*S*)-1-(4-(4-methylthiazol-5-yl)phenyl)ethyl)pyrrolidine-2-carboxamide (PROTAC-6).**

General Procedure A (4 h) was followed by using **indomethacin** (0.034 g, 0.097 mmol) and (2*S*,4*R*)-1-((*S*)-3,3-dimethyl-2-(3-(piperazin-1-yl)propanamido)butanoyl)-4-hydroxy-*N*-((*S*)-1-(4-(4-methylthiazol-5-yl)phenyl)ethyl)pyrrolidine-2-carboxamide hydrochloride <sup>2</sup> (0.060 g, 0.097 mmol)

to afford the titled compound as yellow solid (0.029 g, 32% yield) after purification by flash column chromatography on SiO<sub>2</sub> (DCM/ MeOH, 97:2). <sup>1</sup>H NMR (400 MHz, CDCl<sub>3</sub>) δ 8.78 (d, *J* = 7.7 Hz, 1H), 8.66 (s, 1H), 7.70 – 7.62 (m, 2H), 7.51 – 7.43 (m, 3H), 7.42 – 7.33 (m, 4H), 6.97 (d, *J* = 2.5 Hz, 1H), 6.80 (d, *J* = 9.0 Hz, 1H), 6.65 (dd, *J* = 9.0, 2.5 Hz, 1H), 5.12 – 5.03 (m, 1H), 4.76 (t, *J* = 7.9 Hz, 1H), 4.49 (s, 1H), 4.41 (d, *J* = 7.7 Hz, 1H), 4.21 (d, *J* = 11.6 Hz, 1H), 3.91 – 3.79 (m, 4H), 3.72 (s, 2H), 3.69-3.51 (m, 4H), 3.54 (dd, *J* = 11.6, 3.5 Hz, 1H), 2.65 – 2.28 (m, 15H), 2.11 – 2.02 (m, 1H), 1.46 (d, *J* = 7.0 Hz, 3H), 1.06 (s, 9H); <sup>13</sup>C NMR (101 MHz, CDCl<sub>3</sub>) δ 172.85, 172.18, 169.58, 168.72, 168.26, 155.99, 150.27, 148.51, 143.13, 139.38, 135.26, 133.78, 131.55, 131.22 (2C), 130.90, 130.84, 130.60, 129.55 (2C), 129.15 (2C), 126.42 (2C), 114.88, 113.07, 111.38, 101.64, 70.08, 58.10, 57.94, 56.45, 55.75, 53.79, 52.43 (2C), 48.82, 45.64, 41.78, 35.18, 34.48, 31.64, 30.27, 26.76 (3C), 22.25, 16.11, 13.45. HRMS (ESI) *m/z* [M + Na]<sup>+</sup> calcd for C<sub>49</sub>H<sub>58</sub>ClN<sub>7</sub>O<sub>7</sub>S 946.36992, found 946.37011. UPLC retention time: 5.021 min.

**Methyl 4-(4-(2-(2-(1-(4-chlorobenzoyl)-5-methoxy-2-methyl-1*H*-indol-3-yl)acetamido)ethyl)piperazin-1-yl)-4-oxobutanoate (16).**

General Procedure A (4 h) was followed by using **indomethacin** (0.090 g, 0.250 mmol) and **S42** (0.072 g, 0.250 mmol) to afford the titled compound as yellow oil (0.041 g, 16% yield) after purification by flash column chromatography on SiO<sub>2</sub> (DCM/Acetone/MeOH, 88:10:2). <sup>1</sup>H NMR (400 MHz, CDCl<sub>3</sub>) δ 7.68 – 7.61 (m, 2H), 7.51 – 7.43 (m, 2H), 6.88 (d, *J* = 2.5 Hz, 1H), 6.82 (d, *J* = 9.0 Hz, 1H), 6.67 (dd, *J* = 9.0, 2.5 Hz, 1H), 6.20 (t, *J* = 4.6 Hz, 1H), 3.79 (s, 3H), 3.67 (s, 3H), 3.63 (s, 2H), 3.31 – 3.22 (m, 4H), 3.19 – 3.10 (m, 2H), 2.68 – 2.59 (m, 2H), 2.59 – 2.50 (m, 2H), 2.39 (s, 3H), 2.35 (t, *J* = 6.0 Hz, 2H), 2.27 – 2.15 (m, 4H); <sup>13</sup>C NMR (101 MHz, CDCl<sub>3</sub>) δ 173.56, 169.73, 169.47, 168.28, 156.18, 139.71, 136.32, 133.42, 131.22 (2C), 130.92, 130.34, 129.26 (2C), 14.96, 112.98, 111.80, 101.24, 56.08, 55.77, 52.51, 52.28, 51.78, 44.91, 41.51, 35.84, 32.17, 28.99, 27.85, 13.24. HRMS *m/z* [M+H]<sup>+</sup> calcd for C<sub>30</sub>H<sub>35</sub>ClN<sub>4</sub>O<sub>6</sub> 583.23179, found 583.23176. UPLC retention time: 4.22 min.

***N1-(3-(4-(3-(2-(1-(4-chlorobenzoyl)-5-methoxy-2-methyl-1H-indol-3-yl)acetamido)propyl)piperazin-1-yl)propyl)-N4-((S)-1-((2S,4R)-4-hydroxy-2-(((S)-1-(4-(4-methylthiazol-5-yl)phenyl)ethyl)carbamoyl)pyrrolidin-1-yl)-3,3-dimethyl-1-oxobutan-2-yl)succinamide (PROTAC-8).***

The solution of **S46** (0.095 g, 0.115 mmol) (see Supplementary Information) in 4.0N HCl dioxane (1.0 mL) was stirred at room temperature for 3 h. The solvent was evaporated to dryness and the solid was triturated with DEE and collected by filtration, yielding *N1-(3-(4-(3-aminopropyl)piperazin-1-yl)propyl)-N4-((S)-1-((2S,4R)-4-hydroxy-2-(((S)-1-(4-(4-methylthiazol-5-yl)phenyl)ethyl)carbamoyl)pyrrolidin-1-yl)-3,3-dimethyl-1-oxobutan-2-yl)succinamide hydrochloride (S47)* (0.83 g, 94% yield) as a white solid, which was directly used in the successive step without further purification.

Thus, general Procedure A (3 h) was followed by using **indomethacin** (0.021 g, 0.059 mmol) and **S47** (0.045 g, 0.059 mmol) to afford the titled compound as yellow solid (0.018 g, 28% yield) after purification by flash column chromatography on SiO<sub>2</sub> (DCM/MeOH, 90:10 to 80:20). <sup>1</sup>H NMR (400 MHz, CDCl<sub>3</sub>) δ 8.63 (s, 1H), 8.00 (bs, 1H), 7.85 (bs, 1H), 7.64 (d, *J* = 8.4 Hz, 2H), 7.46 (d, *J* = 8.4 Hz, 2H), 7.41 – 7.31 (m, 4H), 6.91 (d, *J* = 1.8 Hz, 1H), 6.82 (d, *J* = 9.0 Hz, 1H), 6.65 (dd, *J* = 9.1, 2.0 Hz, 1H), 6.36 (bs, 1H), 5.14 – 5.01 (m, 1H), 4.87 – 4.78 (m, 1H), 4.63 – 4.53 (m, 1H), 4.48 – 4.41 (m, 1H), 4.11 – 4.01 (m, 1H), 3.79 (s, 3H), 3.64 – 3.51 (m, 3H), 3.45 (s, 2H), 3.42 – 3.16 (m, 4H), 2.87 – 2.19 (m, 22H), 1.85 – 1.54 (m, 4H), 1.47 (d, *J* = 6.8 Hz, 3H), 1.04 (s, 9H). HRMS (ESI) *m/z* [M + Na]<sup>+</sup> calcd for C<sub>56</sub>H<sub>72</sub>ClN<sub>9</sub>O<sub>8</sub>S 1088.48053, found 1088.48075. UPLC retention time: 4.724 min.

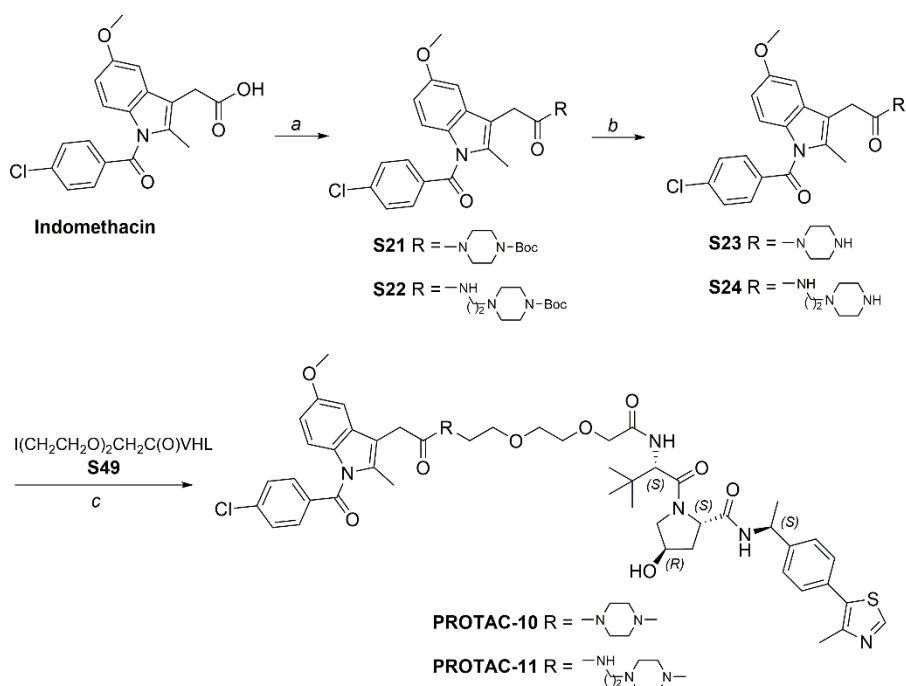

*Reagents and conditions:* (a) HATU, DIPEA, dry DMF, rt; (b) HCl 4N in dioxane, rt; (c) DIPEA, dry DMF/dry DMSO (1:1), 80°C. VHL: VHL ligand.

***Tert*-butyl 4-(2-(1-(4-chlorobenzoyl)-5-methoxy-2-methyl-1*H*-indol-3-yl)acetyl)piperazine-1-carboxylate (S21).**

General Procedure A (3 h) was followed by using **indomethacin** (0.100 g, 0.279 mmol) and *tert*-butyl piperazine-1-carboxylate (0.052 g, 0.279 mmol) to afford the titled compound as yellow solid (0.115 g, 79% yield) after purification by automated flash chromatography on SiO<sub>2</sub> cartridge (DCM/MeOH, 99:1 to 97:3). <sup>1</sup>H NMR (400 MHz, CDCl<sub>3</sub>) δ 7.71 – 7.62 (m, 2H), 7.51 – 7.44 (m, 2H), 6.98 (d, *J* = 2.3 Hz, 1H), 6.80 (d, *J* = 9.0 Hz, 1H), 6.65 (dd, *J* = 9.1, 2.5 Hz, 1H), 3.82 (s, 3H), 3.73 (s, 2H), 3.65 – 3.59 (m, 2H), 3.49 – 3.44 (m, 2H), 3.41 – 3.36 (m, 2H), 3.33 – 3.27 (m, 2H), 2.39 (s, 3H), 1.45 (s, 9H).

***Tert*-butyl 4-(2-(2-(1-(4-chlorobenzoyl)-5-methoxy-2-methyl-1*H*-indol-3-yl)acetamido)ethyl)piperazine-1-carboxylate (S22).**

General Procedure A (3 h) was followed by using **indomethacin** (0.130 g, 0.363 mmol) and *tert*-butyl 4-(2-aminoethyl)piperazine-1-carboxylate (0.083 g, 0.363 mmol) to afford the titled compound as yellow solid (0.176 g, 85% yield) after purification by automated flash chromatography on SiO<sub>2</sub> cartridge (DCM/ MeOH, 99:1 to 95:5). <sup>1</sup>H NMR (400 MHz, CDCl<sub>3</sub>) δ

7.68 (d,  $J = 8.5$  Hz, 2H), 7.50 – 7.45 (m, 2H), 6.92 (d,  $J = 2.1$  Hz, 1H), 6.83 (d,  $J = 9.0$  Hz, 1H), 6.67 (dd,  $J = 9.0, 2.5$  Hz, 1H), 3.81 (s, 3H), 3.65 (s, 2H), 3.46 – 3.07 (m, 6H), 2.55 – 2.17 (m, 9H), 1.44 (s, 9H).

**2-(1-(4-Chlorobenzoyl)-5-methoxy-2-methyl-1H-indol-3-yl)-1-(piperazin-1-yl)ethan-1-one (S23).**

The solution of **S21** (0.100 g, 0.205 mmol) in 4.0N HCl in dioxane (1.0 mL) was stirred at room temperature for 6 h. The solvent was evaporated to dryness, the crude was diluted with NaHCO<sub>3</sub> sat. solution, and then extracted with EA (x3). The reunited organic phases were washed with brine, dried over Na<sub>2</sub>SO<sub>4</sub>, and evaporated to dryness yielding the titled compound as a yellow solid (0.087 g, 98% yield). <sup>1</sup>H NMR (400 MHz, CDCl<sub>3</sub>)  $\delta$  7.66 (d,  $J = 8.5$  Hz, 2H), 7.47 (d,  $J = 8.5$  Hz, 2H), 6.98 (d,  $J = 2.4$  Hz, 1H), 6.81 (d,  $J = 9.0$  Hz, 1H), 6.65 (dd,  $J = 9.0, 2.5$  Hz, 1H), 3.82 (s, 3H), 3.71 (s, 2H), 3.69 – 3.63 (m, 2H), 3.59 – 3.48 (m, 2H), 2.91 – 2.81 (m, 2H), 2.81 – 2.71 (m, 2H), 2.38 (s, 3H).

**2-(1-(4-Chlorobenzoyl)-5-methoxy-2-methyl-1H-indol-3-yl)-N-(2-(piperazin-1-yl)ethyl)acetamide (S24).**

The solution of **S22** (0.170 g, 0.298 mmol) in 4.0N HCl in dioxane (2.0 mL) was stirred at room temperature for 3 h. The solvent was evaporated to dryness, the crude was diluted with NaHCO<sub>3</sub> sat. solution, and then extracted with EA (x3). The reunited organic phases were washed with brine, dried over Na<sub>2</sub>SO<sub>4</sub>, and evaporated to dryness yielding the titled compound as a yellow semi-solid (0.135 g, 96% yield). <sup>1</sup>H NMR (400 MHz, CDCl<sub>3</sub>)  $\delta$  7.77 – 7.60 (d,  $J = 8.5$  Hz, 2H), 7.56 – 7.45 (d,  $J = 8.5$  Hz, 2H), 6.89 (d,  $J = 2.3$  Hz, 1H), 6.86 (d,  $J = 9.0$  Hz, 1H), 6.69 (dd,  $J = 9.0, 2.4$  Hz, 1H), 6.31-6.23 (m, 1H), 3.81 (s, 3H), 3.64 (s, 2H), 3.33 – 3.22 (m, 2H), 2.66 – 2.49 (m, 4H), 2.40 (s, 3H), 2.34 (t,  $J = 6.0$  Hz, 2H), 2.30 – 2.21 (m, 4H).

**(2S,4R)-1-((S)-2-(2-(2-(2-(4-(2-(1-(4-chlorobenzoyl)-5-methoxy-2-methyl-1H-indol-3-yl)acetyl)piperazin-1-yl)ethoxy)ethoxy)acetamido)-3,3-dimethylbutanoyl)-4-hydroxy-N-((S)-1-(4-(4-methylthiazol-5-yl)phenyl)ethyl)pyrrolidine-2-carboxamide (PROTAC-10).**

Under nitrogen atmosphere, to the solution of **S49** (0.045 g, 0.064 mmol) in a mixture of dry DMSO and dry DMF 1:1 (2.0 ml), DIPEA (0.034 mL, 0.192 mmol) and **S23** (0.027 g, 0.064 mmol) were added. The yellow suspension was stirred at 80 °C for 18 h. After cooling, the yellow solution was diluted with EA (50 mL) and washed with NaHCO<sub>3</sub> saturated solution (30 mL) and brine (30 mL). The organic layer was dried over Na<sub>2</sub>SO<sub>4</sub>, filtered and concentrated to dryness. The crude was purified by flash column chromatography on SiO<sub>2</sub> (DCM/MeOH, 97:3 to 95:5) to afford the titled compound as clear yellow solid (0.016 g, 25% yield). <sup>1</sup>H NMR (400 MHz, CDCl<sub>3</sub>) δ 8.69 (s, 1H), .67 (d, *J* = 8.3 Hz, 2H), 7.48 (d, *J* = 8.3 Hz, 3H), 7.44-7.33 (m, 4H), 7.28 – 7.23 (m, 1H), 7.04 – 6.95 (m, 1H), 6.84 (d, *J* = 9.0 Hz, 1H), 6.67 (dd, *J* = 9.1, 1.9, 1H), 5.13 – 5.05 (m, 1H), 4.75 (t, *J* = 7.8 Hz, 1H), 4.57 (d, *J* = 8.6 Hz, 1H), 4.51 (bs, 2H), 4.16 – 4.02 (m, 3H), 3.83 (s, 3H), 3.80 – 3.51 (m, 13H), 2.73 – 2.27 (m, 13H), 2.11 – 2.00 (m, 1H), 1.48 (d, *J* = 6.9 Hz, 3H), 1.08 (s, 9H); <sup>13</sup>C NMR (400 MHz, CDCl<sub>3</sub>) δ 171.53, 170.25, 169.65, 168.74, 168.29, 155.97, 150.26, 148.52, 143.23, 139.30, 135.25, 133.88, 131.59, 131.22 (2C), 130.88, 130.86, 130.74, 129.56 (2C), 129.13 (2C), 126.41 (2C), 114.87, 113.31, 111.39, 101.71, 70.91, 70.50, 70.43, 70.08, 68.89, 58.30, 57.44, 57.09, 56.66, 55.77, 53.72, 52.92, 48.84, 45.85, 42.02, 35.50, 35.16, 30.13, 26.52 (3C), 22.27, 16.12, 13.47. HRMS (ESI) *m/z* [M + H]<sup>+</sup> calcd for C<sub>52</sub>H<sub>64</sub>ClN<sub>7</sub>O<sub>9</sub>S 998.42475, found 998.42541. UPLC retention time: 5.087 min.

**(2*S*,4*R*)-1-((*S*)-2-(2-(2-(2-(4-(2-(2-(1-(4-Chlorobenzoyl)-5-methoxy-2-methyl-1*H*-indol-3-yl)acetamido)ethyl)piperazin-1-yl)ethoxy)ethoxy)acetamido)-3,3-dimethylbutanoyl)-4-hydroxy-*N*-((*S*)-1-(4-(4-methylthiazol-5-yl)phenyl)ethyl)pyrrolidine-2-carboxamide (PROTAC-11).**

Under nitrogen atmosphere, to the solution of **S49** (0.108 g, 0.154 mmol) in a mixture of dry DMSO and dry DMF 1:1 (2.0 ml), DIPEA (0.081 mL, 0.462 mmol) and **S24** (0.072 g, 0.154 mmol) were added. The yellow suspension was stirred at 80 °C for 18 h. After cooling, the yellow solution was diluted with EA (50 mL) and washed with NaHCO<sub>3</sub> saturated solution (30 mL) and brine (30 mL). The organic layer was dried over Na<sub>2</sub>SO<sub>4</sub>, filtered and concentrated to dryness. The crude was



purified by flash column chromatography on SiO<sub>2</sub> (DCM/MeOH, 98:2) to afford the titled compound as clear yellow solid (0.019 g, 12% yield). <sup>1</sup>H NMR (400 MHz, DMSO-*d*<sub>6</sub>) δ 8.98 (s, 1H), 8.43 (d, *J* = 7.0 Hz, 1H), 7.90 – 7.77 (m, 1H), 7.74 – 7.59 (m, 4H), 7.51 – 7.28 (m, 5H), 7.11 (s, 1H), 6.94 (d, *J* = 8.7 Hz, 1H), 6.71 (d, *J* = 8.2 Hz, 1H), 5.13 (s, 1H), 4.96 – 4.82 (m, 1H), 4.54 (d, *J* = 9.2 Hz, 1H), 4.44 (t, *J* = 7.3 Hz, 1H), 4.28 (bs, 1H), 3.96 (s, 2H), 3.76 (s, 3H), 3.69 – 3.43 (m, 10H), 3.21 – 3.06 (m, 2H), 2.47 – 2.13 (m, 18H), 2.12 – 1.98 (m, 1H), 1.83 – 1.69 (m, 1H), 1.36 (d, *J* = 6.2 Hz, 3H), 0.94 (s, 9H); <sup>13</sup>C NMR (101 MHz, DMSO-*d*<sub>6</sub>) δ 170.89, 169.68, 169.44, 168.94, 168.29, 156.01, 151.93, 148.20, 145.17, 138.01, 135.60, 134.71, 131.59 (2C), 131.56, 131.32, 130.75, 130.14, 129.50 (2C), 129.28 (2C), 126.77 (2C), 114.98, 114.79, 111.66, 102.41, 70.90, 70.07, 69.91, 69.23, 68.77, 65.38, 59.01, 57.60, 57.34, 56.98, 56.13, 55.90, 53.52 (2C), 53.15, 48.21, 38.19, 36.74, 36.21, 31.65, 26.71 (3C), 22.95, 16.45, 13.85. HRMS (ESI) *m/z* [M + H]<sup>+</sup> calcd for C<sub>54</sub>H<sub>69</sub>ClN<sub>8</sub>O<sub>9</sub>S 1063.44890, found 1063.45014. UPLC retention time: 4.993 min.

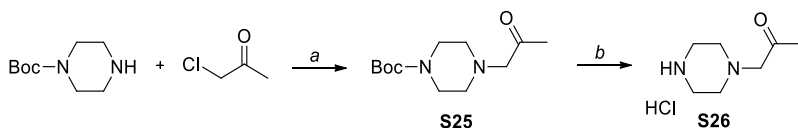

*Reagents and conditions:* (a) K<sub>2</sub>CO<sub>3</sub>, ACN, rt; (b) HCl 4.0N in dioxane, rt.

### ***Tert*-butyl 4-(2-oxopropyl)piperazine-1-carboxylate (S25).<sup>7</sup>**

To a stirring solution of *tert*-butyl piperazine-1-carboxylate (0.100 g, 0.537 mmol) in ACN (3.0 mL) was added K<sub>2</sub>CO<sub>3</sub> (0.297 g, 2.147 mmol) and 1-chloropropan-2-one (0.055 mL, 0.698 mmol) and the mixture was stirred at room temperature for 20 h. The reaction was diluted with water (30 mL) and extracted with EA (× 3). The combined organic layer was washed with brine, dried over anhydrous Na<sub>2</sub>SO<sub>4</sub>, filtered, and evaporated to dryness to afford a yellow oil (0.116 g, 89% yield). <sup>1</sup>H NMR (400 MHz, CDCl<sub>3</sub>) δ 3.53 – 3.43 (m, 4H), 3.21 (s, 2H), 2.50 – 2.39 (m, 4H), 2.15 (s, 3H), 1.45 (s, 9H).

### **1-(Piperazin-1-yl)propan-2-one hydrochloride (S26).**

General Procedure B (2 h) was followed by using **S25** (0.110 g, 0.454 mmol) and 4.0 N HCl in dioxane (1.10 mL) to afford the titled compound as grey solid (0.080 g, 99% yield).  $^1\text{H}$  NMR (400 MHz,  $\text{DMSO-}d_6$ )  $\delta$  9.83 (bs, 2H), 4.33 (s, 2H), 3.56 – 3.22 (m, 8H), 2.16 (s, 3H).

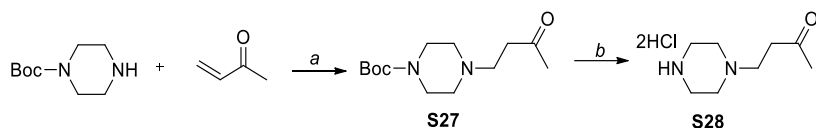

*Reagents and conditions:* (a)  $\text{K}_2\text{CO}_3$ , ACN, rt; (b) HCl 4.0N in dioxane, rt.

### ***Tert*-butyl 4-(3-oxobutyl)piperazine-1-carboxylate (**S27**).<sup>7</sup>**

To a stirring solution of *tert*-butyl piperazine-1-carboxylate (0.100 g, 0.537 mmol) in ACN (3.0 mL) was added  $\text{K}_2\text{CO}_3$  (0.126 g, 0.913 mmol) and but-3-en-2-one (0.055 mL, 0.698 mmol) and the mixture was stirred at room temperature for 4 h. The reaction was filtered and the filtrate diluted with water (30 mL) and extracted with EA ( $\times 3$ ). The combined organic layer was washed with brine, dried over anhydrous  $\text{Na}_2\text{SO}_4$ , filtered, and evaporated to dryness to afford a yellow oil (0.137 g, 100% yield).  $^1\text{H}$  NMR (400 MHz,  $\text{CDCl}_3$ )  $\delta$  3.46 – 3.37 (m, 4H), 2.71 – 2.58 (m, 4H), 2.43 – 2.34 (m, 4H), 2.17 (s, 3H), 1.45 (s, 9H).

### **4-(Piperazin-1-yl)butan-2-one hydrochloride (**S28**).**

General Procedure B (2 h) was followed by using **S27** (0.130 g, 0.507 mmol) and 4.0 N HCl in dioxane (1.30 mL) to afford the titled compound as grey solid (0.101 g, 87% yield).

$^1\text{H}$  NMR (400 MHz,  $\text{DMSO-}d_6$ )  $\delta$  11.98 (bs, 1H), 9.84 (s, 2H), 3.69 – 3.23 (m, 10H), 3.06 (t,  $J = 6.9$  Hz, 2H), 2.15 (s, 3H).

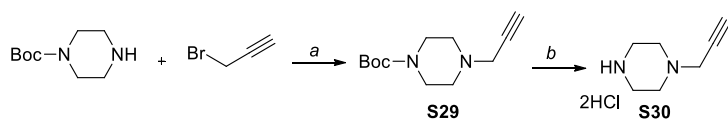

*Reagents and conditions:* (a)  $\text{K}_2\text{CO}_3$ , ACN, rt; (b) HCl 4.0N in dioxane, rt.

### 1-(Prop-2-yn-1-yl)piperazine dihydrochloride (S30).<sup>8</sup>

General Procedure B (overnight) was followed by using *tert*-butyl 4-(prop-2-yn-1-yl)piperazine-1-carboxylate **S29**<sup>9</sup> (0.228 g, 1.016 mmol) and 4.0 N HCl in dioxane (0.5 mL) to afford the titled compound as light-yellow solid (0.187 g, 94% yield). <sup>1</sup>H NMR (400 MHz, DMSO-*d*<sub>6</sub>) δ 9.59 (bs, 3H), 3.96 (s, 2H), 3.73 (s, 1H), 3.48 – 2.88 (m, 8H).

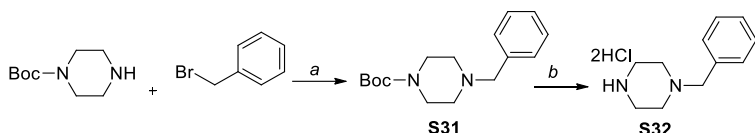

Reagents and conditions: (a) K<sub>2</sub>CO<sub>3</sub>, ACN, rt; (b) HCl 4.0N in dioxane, rt.

### 1-Benzylpiperazine dihydrochloride (S32).

General Procedure B (3 h) was followed by using *tert*-butyl 4-benzylpiperazine-1-carboxylate **S31**<sup>10</sup> (0.078 g, 0.282 mmol) and 4.0 N HCl in dioxane (1.0 mL) to afford the titled compound as white solid (0.062 g, 88% yield). <sup>1</sup>H NMR (400 MHz, DMSO-*d*<sub>6</sub>) δ 12.19 (bs, 1H), 9.73 (s, 2H), 7.75 – 7.32 (m, 5H), 4.36 (s, 2H), 3.65 – 3.44 (m, 6H), 3.32 – 3.08 (m, 2H).

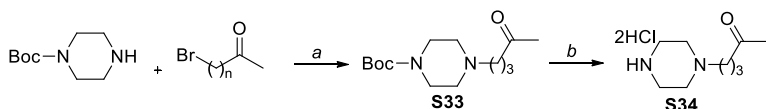

Reagents and conditions: (a) DIPEA, KI, ACN, 90°C; (b) HCl 4.0N in dioxane, rt.

### *Tert*-butyl 4-(4-oxopentyl)piperazine-1-carboxylate (S33).

To a stirring solution of *tert*-butyl piperazine-1-carboxylate (0.200 g, 1.074 mmol) in ACN (3.0 mL) were added DIPEA (0.281 mL, 1.611 mmol), 5-chloropentan-2-one (0.184 mL, 1.611 mmol), KI (0.180 g, 0. 1.074 mmol) and the mixture was refluxed for 48 h. The crude mixture was diluted with EA (20 mL), washed with water ( $\times 2$ ), brine, dried over anhydrous  $\text{Na}_2\text{SO}_4$ , filtered and evaporated to dryness. The titled compound was afforded as a brown oil (0.185 g, 64%).  $^1\text{H}$  NMR (400 MHz,  $\text{CDCl}_3$ )  $\delta$  3.44 – 3.36 (m, 4H), 2.46 (t,  $J = 7.1$  Hz, 2H), 2.40 – 2.28 (m, 6H), 2.15 (s, 3H), 1.81 – 1.72 (m,  $J = 7.3$  Hz, 2H), 1.45 (s, 9H).

### 5-(Piperazin-1-yl)pentan-2-one hydrochloride (S34).

General Procedure B (2 h) was followed by using **S33** (0.185 g, 0.684 mmol) and 4.0 N HCl in dioxane (2.0 mL) to afford the titled compound as brownish oil (0.123 g, 74% yield).  $^1\text{H}$  NMR (400 MHz,  $\text{DMSO-}d_6$ )  $\delta$  11.77 (bs, 1H), 9.75 (bs, 2H), 3.77 – 3.57 (m,  $J = 30.0$  Hz, 2H), 3.54 – 3.44 (m, 4H), 3.32 – 3.18 (m, 2H), 3.09 – 3.01 (m, 2H), 2.58 (t,  $J = 7.0$  Hz, 2H), 2.10 (s, 3H), 1.90 – 1.81 (m, 2H).

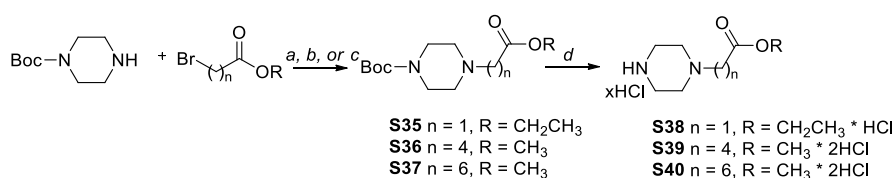

*Reagents and conditions:* (a) DIPEA, dry THF, rt; (b)  $\text{K}_2\text{CO}_3$ , KI, dry THF,  $60^\circ\text{C}$ ; (c)  $\text{K}_2\text{CO}_3$ , dry THF,  $60^\circ\text{C}$ ; (d) HCl 4.0N in dioxane, rt.

### *Tert*-butyl 4-(2-ethoxy-2-oxoethyl)piperazine-1-carboxylate (S35).<sup>3</sup>

To a stirring solution of *tert*-butyl piperazine-1-carboxylate (0.100 g, 0.537 mmol) in dry THF (2.0 mL) were added DIPEA (0.18 mL, 1.074 mmol) and ethyl 2-bromoacetate (0.12 mL, 0.564 mmol) and the mixture was stirred at room temperature for 18 h. The reaction was evaporated to dryness, the crude was diluted with water (30 mL) and extracted with EA ( $\times 3$ ). The combined organic layer was washed with brine, dried over anhydrous Na<sub>2</sub>SO<sub>4</sub>, filtered, and evaporated to dryness to afford a yellow oil (0.140 g, 96% yield). <sup>1</sup>H NMR (400 MHz, CDCl<sub>3</sub>)  $\delta$  4.19 (q,  $J = 7.1$  Hz, 2H), 3.56 – 3.41 (m, 4H), 3.23 (s, 2H), 2.67 – 2.45 (m, 4H), 1.45 (s, 9H), 1.27 (t,  $J = 7.2$  Hz, 3H).

***Tert*-butyl 4-(5-methoxy-5-oxopentyl)piperazine-1-carboxylate (S36).<sup>4</sup>**

To a stirring solution of *tert*-butyl piperazine-1-carboxylate (0.100 g, 0.537 mmol) in dry THF (2.0 mL) were added K<sub>2</sub>CO<sub>3</sub> (0.150 g, 1.074 mmol) and methyl 5-bromopentanoate (0.081 mL, 0.564 mmol) and the mixture was stirred at 60°C for 18 h. The reaction was evaporated to dryness, the crude was diluted with water (30 mL) and extracted with EA ( $\times 3$ ). The combined organic layer was washed with brine, dried over anhydrous Na<sub>2</sub>SO<sub>4</sub>, filtered, and evaporated to dryness. The crude was purified by flash column chromatography on SiO<sub>2</sub> (DCM/MeOH, 98:2) to afford the titled compound as a colourless oil (0.112 g, 69% yield). <sup>1</sup>H NMR (400 MHz, CDCl<sub>3</sub>)  $\delta$  3.66 (s, 3H), 3.47 – 3.38 (m, 4H), 2.48 – 2.24 (m, 8H), 1.70 – 1.59 (m,  $J = 15.1, 7.6$  Hz, 2H), 1.57 – 1.42 (m, 11H).

***Tert*-butyl 4-(7-methoxy-7-oxoheptyl)piperazine-1-carboxylate (S37).<sup>5</sup>**

To a stirring solution of *tert*-butyl piperazine-1-carboxylate (0.100 g, 0.537 mmol) in dry THF (2.0 mL) were added K<sub>2</sub>CO<sub>3</sub> (0.150 g, 1.074 mmol), methyl 7-bromoheptanoate (0.11 mL, 0.644 mmol), and KI (0.009 g, 0.054 mmol) and the mixture was stirred at 60°C for 18 h. The reaction was evaporated to dryness, the crude was diluted with water (30 mL) and extracted with EA ( $\times 3$ ). The combined organic layer was washed with brine, dried over anhydrous Na<sub>2</sub>SO<sub>4</sub>, filtered, and

evaporated to dryness. The crude was purified by flash column chromatography on SiO<sub>2</sub> (DCM/MeOH, 98:2) to afford the titled compound as a colourless oil (0.184 g, 97% yield). <sup>1</sup>H NMR (400 MHz, CDCl<sub>3</sub>) δ 3.65 (s, 3H), 3.47 – 3.36 (m, 4H), 2.41 – 2.28 (m, 6H), 1.95 – 1.77 (m, 2H), 1.68 – 1.57 (m, 3H), 1.54 – 1.27 (m, 14H).

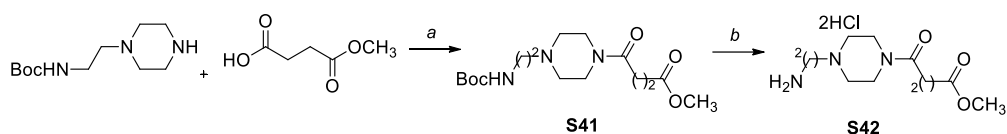

*Reagents and conditions:* (e) HATU, DIPEA, rt; (b) HCl 4.0N in dioxane, rt.

### **Methyl 3-(4-(((*tert*-butoxycarbonyl)amino)methyl)piperazin-1-yl)-3-oxopropanoate (S41).**

Under nitrogen atmosphere, to a stirred solution of 4-methoxy-4-oxobutanoic acid (0.100 mg, 0.757 mmol), *tert*-butyl (2-(piperazin-1-yl)ethyl)carbamate (0.174 mg, 0.757 mmol) and DIPEA (0.396 mL, 2.271 mmol) in dry DMF (1.0 mL) was added HATU (0.360 mg, 0.964 mmol) and the reaction mixture was stirred at room temperature for 3 h. The mixture was diluted with water, extracted with EA (x3) and the reunited organic phases were washed with water (x3), brine (x3), dried over Na<sub>2</sub>SO<sub>4</sub>, and evaporated to dryness. The crude was purified by flash column chromatography on SiO<sub>2</sub> (DCM/MeOH, 98:2) to afford the titled compound as a colourless oil (0.125 g, 48% yield). <sup>1</sup>H NMR (400 MHz, CDCl<sub>3</sub>) δ 5.03 (bs, 1H), 3.79 – 3.62 (m, 5H), 3.62 – 3.50 (m, 2H), 3.37 – 3.20 (m, 2H), 2.76 – 2.35 (m, 10H), 1.45 (s, 9H).

### **Methyl 3-(4-(aminomethyl)piperazin-1-yl)-3-oxopropanoate dihydrochloride (S42).**

General Procedure B (4 h) was followed by using methyl **S41** (0.118 g, 0.343 mmol) and 4.0 N HCl in dioxane (1.18 mL) to afford the titled compound as white solid (0.070 g, 71% yield). <sup>1</sup>H NMR (400 MHz, DMSO-*d*<sub>6</sub>) δ 11.71 (bs, 1H), 8.59 (s, 2H), 4.77 – 3.98 (m, 4H), 3.43 – 2.89 (m, 11H), 2.74 – 2.55 (m, 4H).

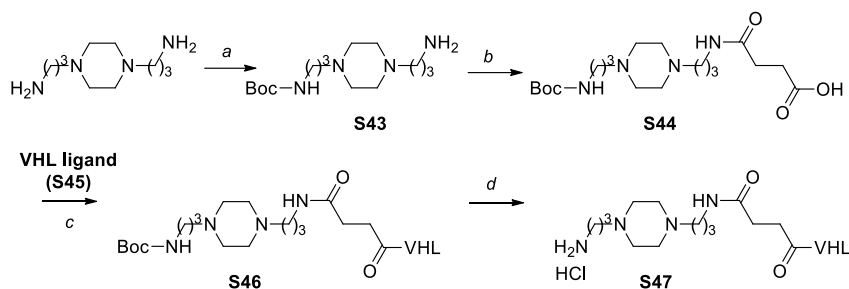

*Reagents and conditions:* (a)  $\text{Boc}_2\text{O}$ , dry MeOH, rt; (b) succinic anhydride, dry DCM, rt; (c) HATU, DIPEA, dry DMF, rt; (d) HCl 4.0N in dioxane, rt.

***Tert*-butyl (3-(4-(3-(4-(((*S*)-1-((2*S*,4*R*)-4-hydroxy-2-(((*S*)-1-(4-(4-methylthiazol-5-yl)phenyl)ethyl)carbamoyl)pyrrolidin-1-yl)-3,3-dimethyl-1-oxobutan-2-yl)amino)-4-oxobutanamido)propyl)piperazin-1-yl)propyl)carbamate (S46).**

Under a nitrogen atmosphere, a solution of **S43**<sup>11</sup> (0.150 g, 0.499 mmol) and dihydrofuran-2,5-dione (0.124 g, 0.458 mmol) in dry DCM (2.0 mL) was stirred at room temperature for 4 h. Then, the reaction mixture was evaporated to dryness to give **S44** (0.190 g, 95% yield) as a colorless oil, which was used in the successive step without further purification.

Thus, general Procedure A (18 h) was followed by using **S44** (0.190 g, 0.474 mmol) and **S45**<sup>12</sup> (0.228 g, 0.474 mmol) to afford the titled compound as colourless oil (0.095 g, 24% yield) after purification by flash column chromatography on  $\text{SiO}_2$  (DCM/MeOH, 90:5 to 80:20).  $^1\text{H}$  NMR (400 MHz,  $\text{CDCl}_3$ )  $\delta$  8.67 (s, 1H), 7.69 – 7.59 (m, 1H), 7.49 (bs, 1H), 7.43 – 7.32 (m, 4H), 7.06 (bs, 1H), 5.19 (bs, 1H), 5.15 – 5.04 (m, 1H), 4.75 (t,  $J = 8.0$  Hz, 1H), 4.56 (d,  $J = 8.6$  Hz, 1H), 4.47 (s, 1H), 4.01 (d,  $J = 11.2$  Hz, 1H), 3.59 (dd,  $J = 11.2, 3.1$  Hz, 1H), 3.44 – 3.11 (m, 4H), 3.10 – 2.20 (m, 20H), 2.16 – 2.06 (m, 1H), 1.82 – 1.61 (m, 4H), 1.57 – 1.27 (m, 12H), 1.05 (s, 9H). HRMS (ESI)  $m/z$   $[\text{M} + \text{H}]^+$  calcd for  $\text{C}_{42}\text{H}_{66}\text{N}_8\text{O}_7\text{S}$  827.48479, found 827.48713. UPLC retention time: 3.777 min.

***N*l-(3-(4-(3-aminopropyl)piperazin-1-yl)propyl)-*N*4-((*S*)-1-((2*S*,4*R*)-4-hydroxy-2-(((*S*)-1-(4-(4-methylthiazol-5-yl)phenyl)ethyl)carbamoyl)pyrrolidin-1-yl)-3,3-dimethyl-1-oxobutan-2-yl)succinamide hydrochloride (S47).**

The solution of **S46** (0.095 g, 0.115 mmol) in 4.0N HCl in dioxane (1.0 mL) was stirred at room temperature for 3 h. The solvent was evaporated to dryness, and the solid was triturated with DEE and collected by filtration, yielding the titled compound (0.83 g, 94% yield) as a white solid, which was directly used in the successive step without further purification.

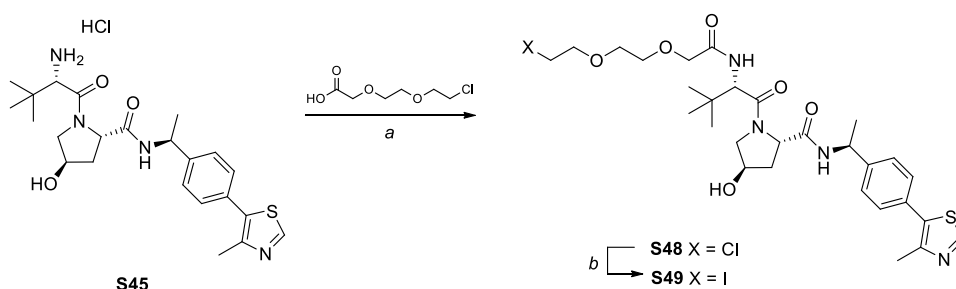

Reagents and conditions: (a) HATU, DIPEA, dry DMF, rt; (b) NaI, dry acetone, reflux, 48h.

**(2S,4R)-1-((S)-2-(2-(2-(2-chloroethoxy)ethoxy)acetamido)-3,3-dimethylbutanoyl)-4-hydroxy-N-((S)-1-(4-(4-methylthiazol-5-yl)phenyl)ethyl)pyrrolidine-2-carboxamide (S48).**

General Procedure A (5 h) was followed by using **S45** (0.250 g, 0.519 mmol) and 2-(2-(2-chloroethoxy)ethoxy)acetic acid<sup>13</sup> (0.095 g, 0.519 mmol) to afford the titled compound as a colorless oil (0.115 g, 36% yield) after purification by flash column chromatography on SiO<sub>2</sub> (DCM/MeOH, 95:5). <sup>1</sup>H NMR (400 MHz, CDCl<sub>3</sub>) δ 8.68 (s, 1H), 7.53 (d, *J* = 7.8 Hz, 1H), 7.40 – 7.32 (m, 5H), 5.10 – 5.01 (m, 1H), 4.69 (t, *J* = 7.8 Hz, 1H), 4.56 (d, *J* = 8.9 Hz, 1H), 4.47 (bs, 1H), 4.03 – 3.95 (m, 3H), 3.78 – 3.71 (m, 2H), 3.70 – 3.64 (m, 4H), 3.64 – 3.57 (m, 3H), 2.50 (s, 3H), 2.46 – 2.36 (m, 1H), 2.09 – 1.97 (m, 1H), 1.46 (d, *J* = 6.9 Hz, 3H), 1.04 (s, 9H).

**(2S,4R)-4-Hydroxy-1-((S)-2-(2-(2-(2-iodoethoxy)ethoxy)acetamido)-3,3-dimethylbutanoyl)-N-((S)-1-(4-(4-methylthiazol-5-yl)phenyl)ethyl)pyrrolidine-2-carboxamide (S49).**

The solution of **S48** (0.045 g, 0.074 mmol) and sodium iodide (111 mg, 0.739 mmol) in dry acetone (2.5 mL) was refluxed for 48 h. After cooling, the yellow suspension was diluted with EA (15 mL) and it was washed with 10% Na<sub>2</sub>SO<sub>3</sub> solution (5 mL), H<sub>2</sub>O and brine (each 10 mL), dried over Na<sub>2</sub>SO<sub>4</sub>, filtered and concentrated to dryness to afford the titled compound (0.048 g, 92% yield) as



an orange semi-solid.  $^1\text{H}$  NMR (400 MHz,  $\text{CDCl}_3$ )  $\delta$  8.87 (s, 1H), 7.51 (d,  $J = 7.9$  Hz, 1H), 7.45 – 7.37 (m, 4H), 7.35 (d,  $J = 8.4$  Hz, 1H), 5.13 – 5.04 (m, 1H), 4.76 (t,  $J = 7.7$  Hz, 1H), 4.58 – 4.49 (m, 2H), 4.17 – 3.97 (m, 3H), 3.82 – 3.64 (m, 6H), 3.60 (dd,  $J = 11.4, 3.6$  Hz, 1H), 3.29 (t,  $J = 6.9$  Hz, 2H), 2.61 – 2.54 (m, 4H), 2.11 – 2.01 (m, 1H), 1.48 (d,  $J = 6.9$  Hz, 3H), 1.07 (s, 9H).

$^1\text{H}$  NMR (400 MHz,  $\text{DMSO-}d_6$ ) spectrum of compound **1**.

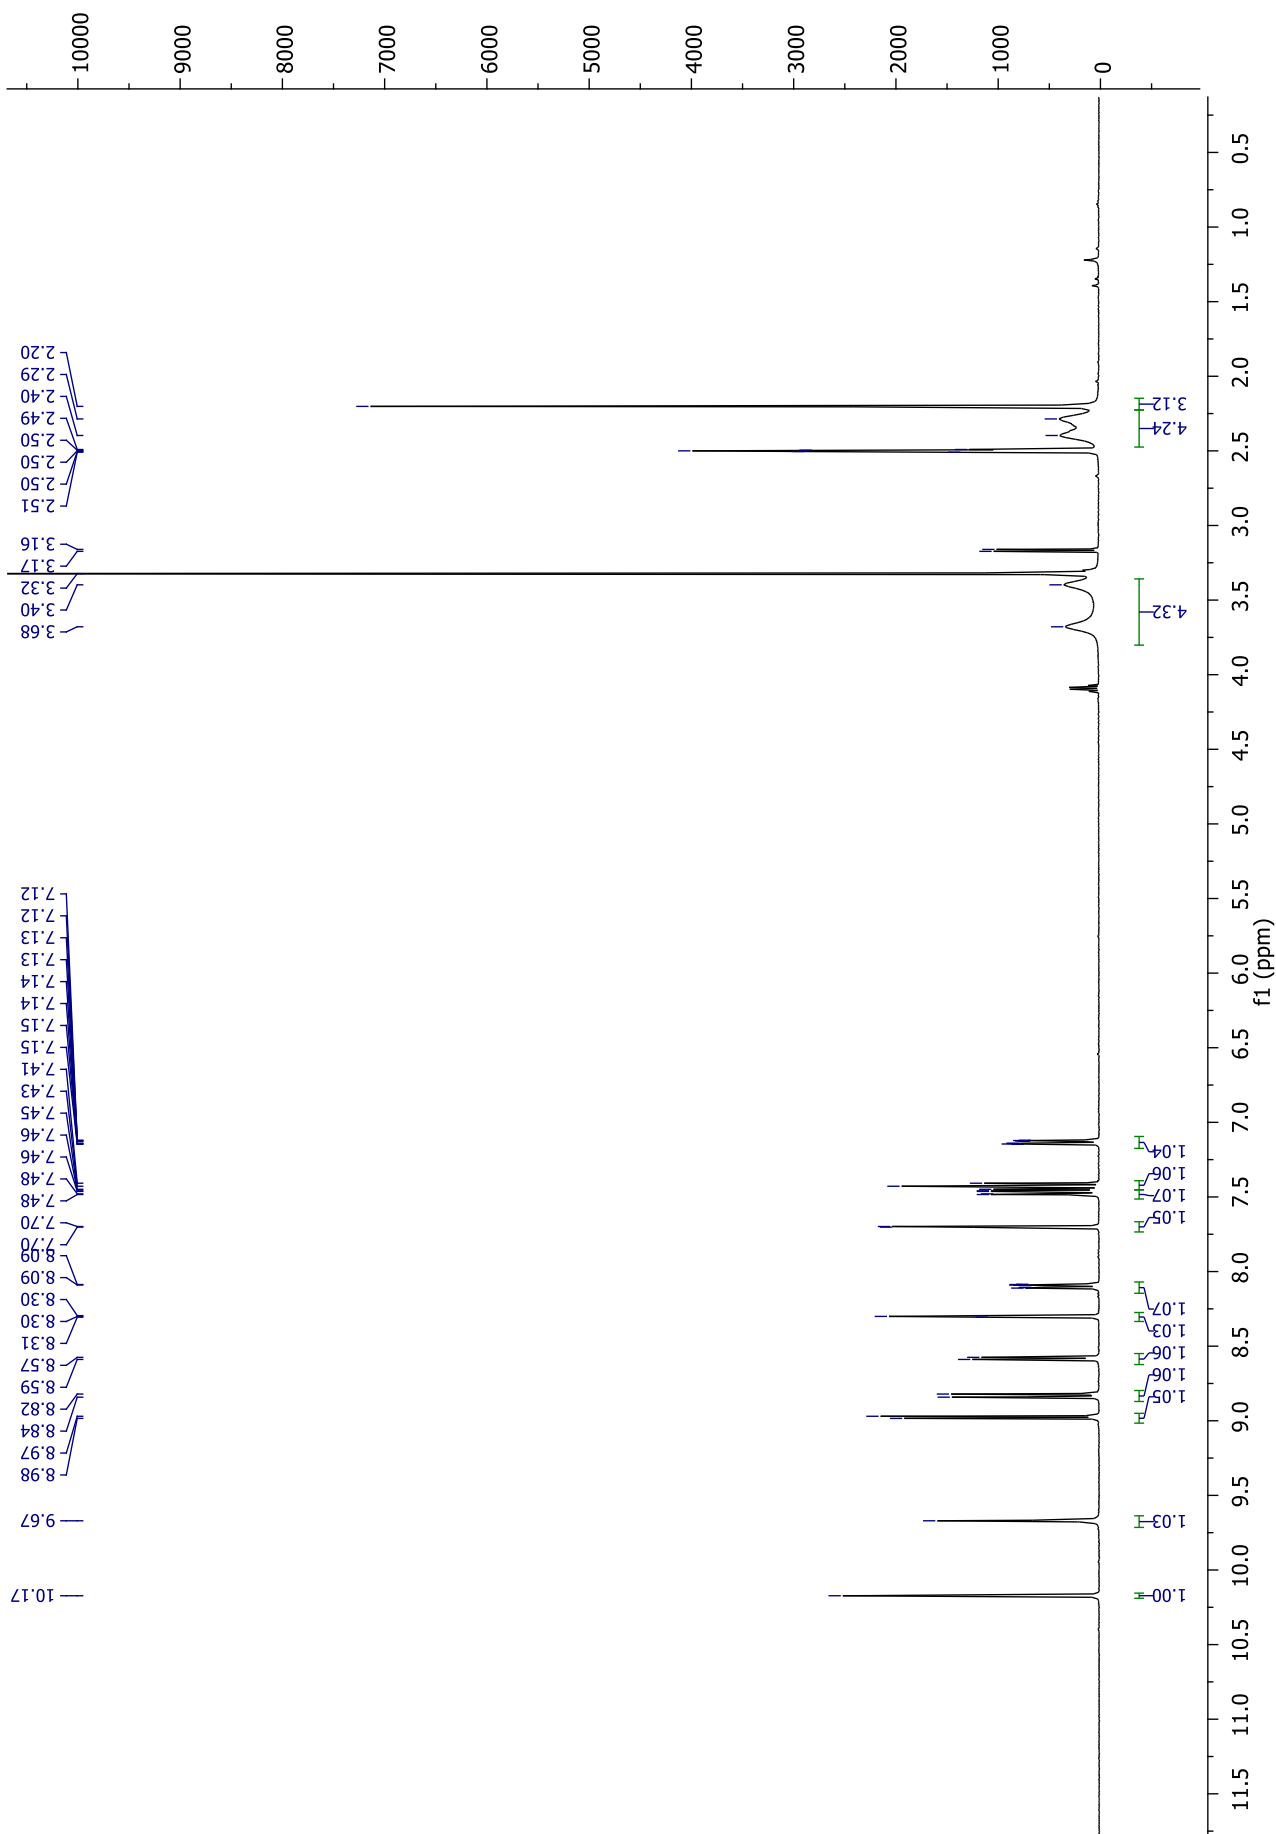

$^{13}\text{C}$  NMR (101 MHz,  $\text{DMSO-}d_6$ ) spectrum of compound 1.

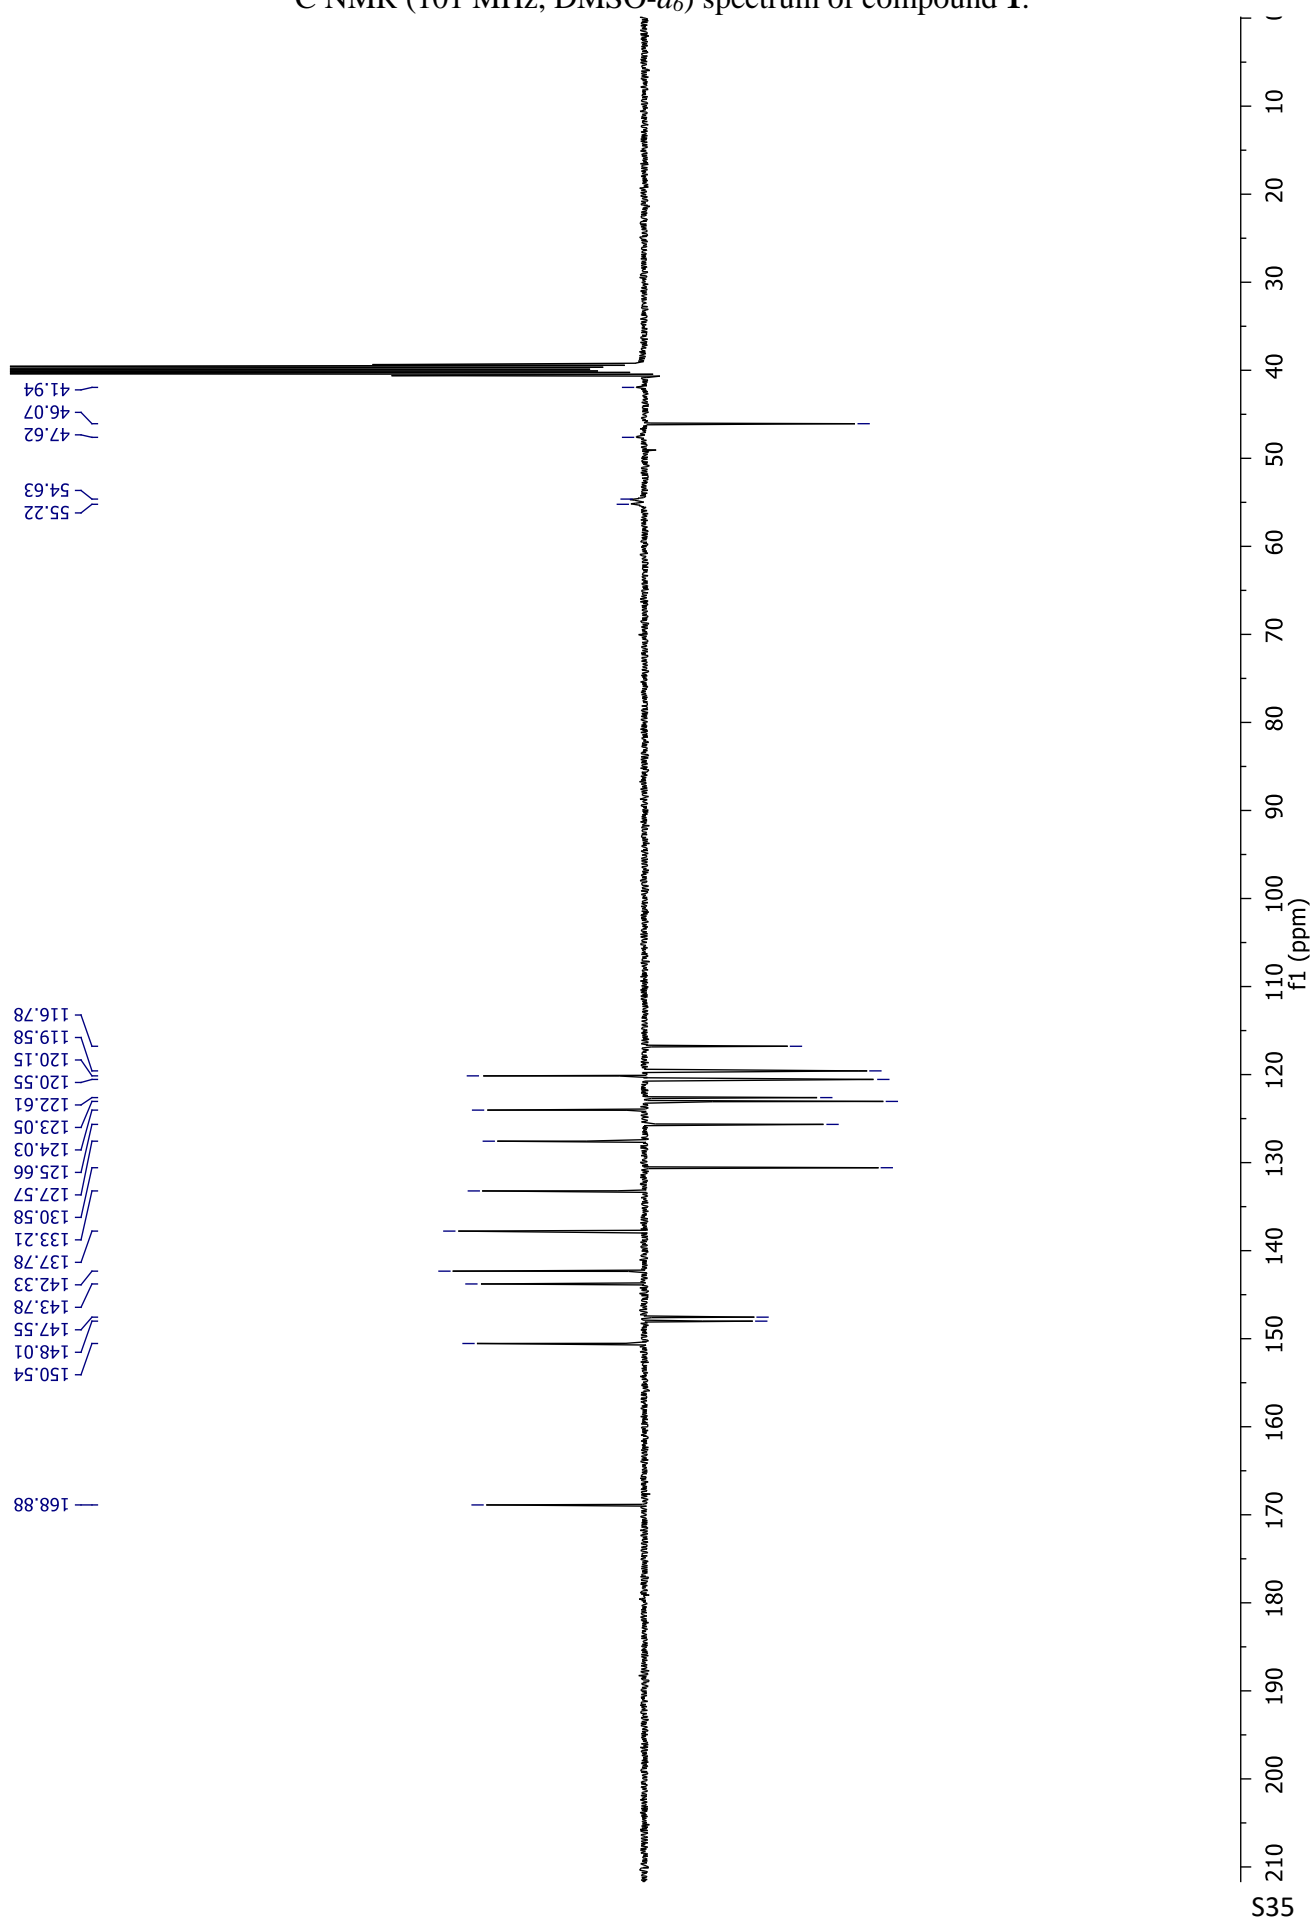

$^1\text{H}$  NMR (400 MHz,  $\text{CDCl}_3$ ) spectrum of compound **2**.

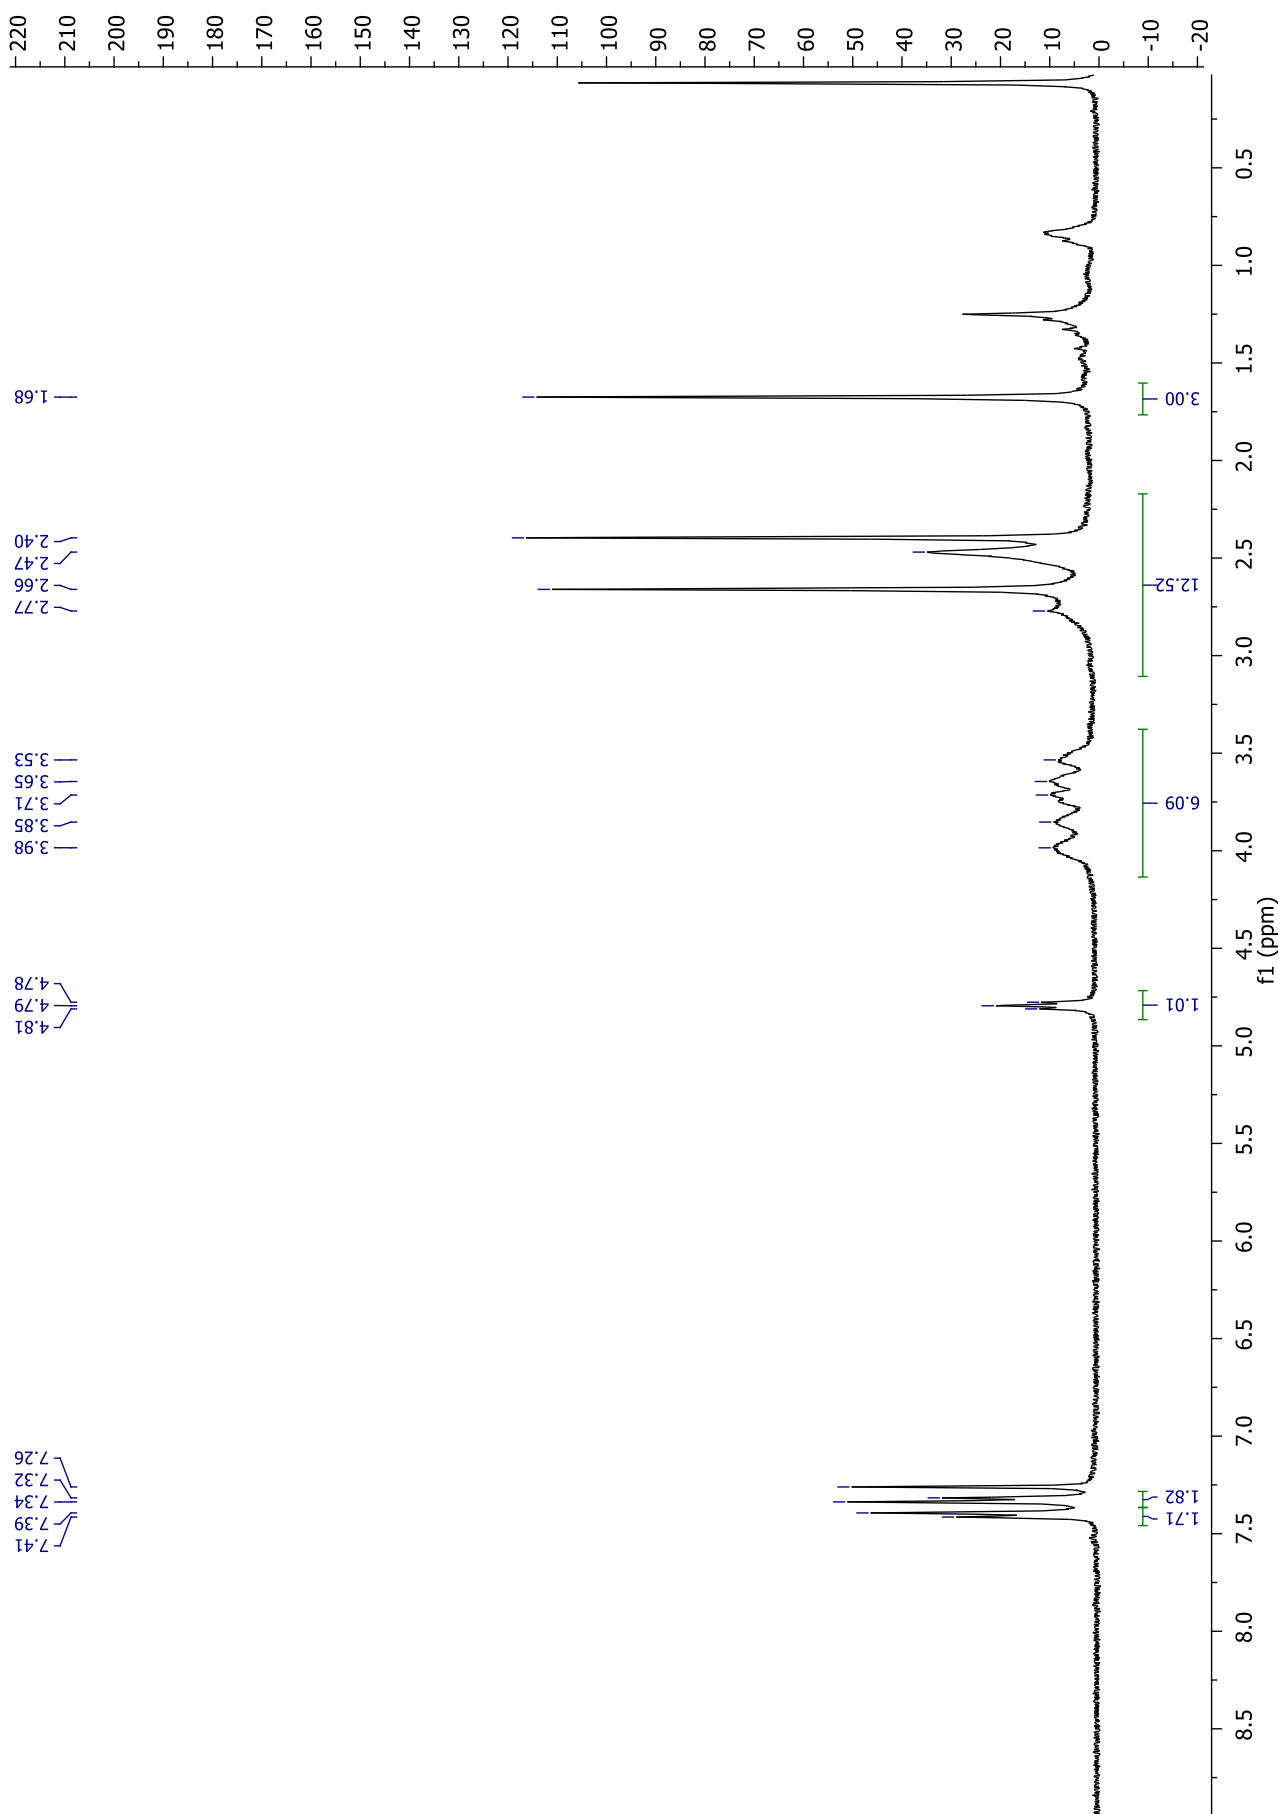

$^{13}\text{C}$  NMR (101 MHz,  $\text{CDCl}_3$ ) spectrum of compound **2**.

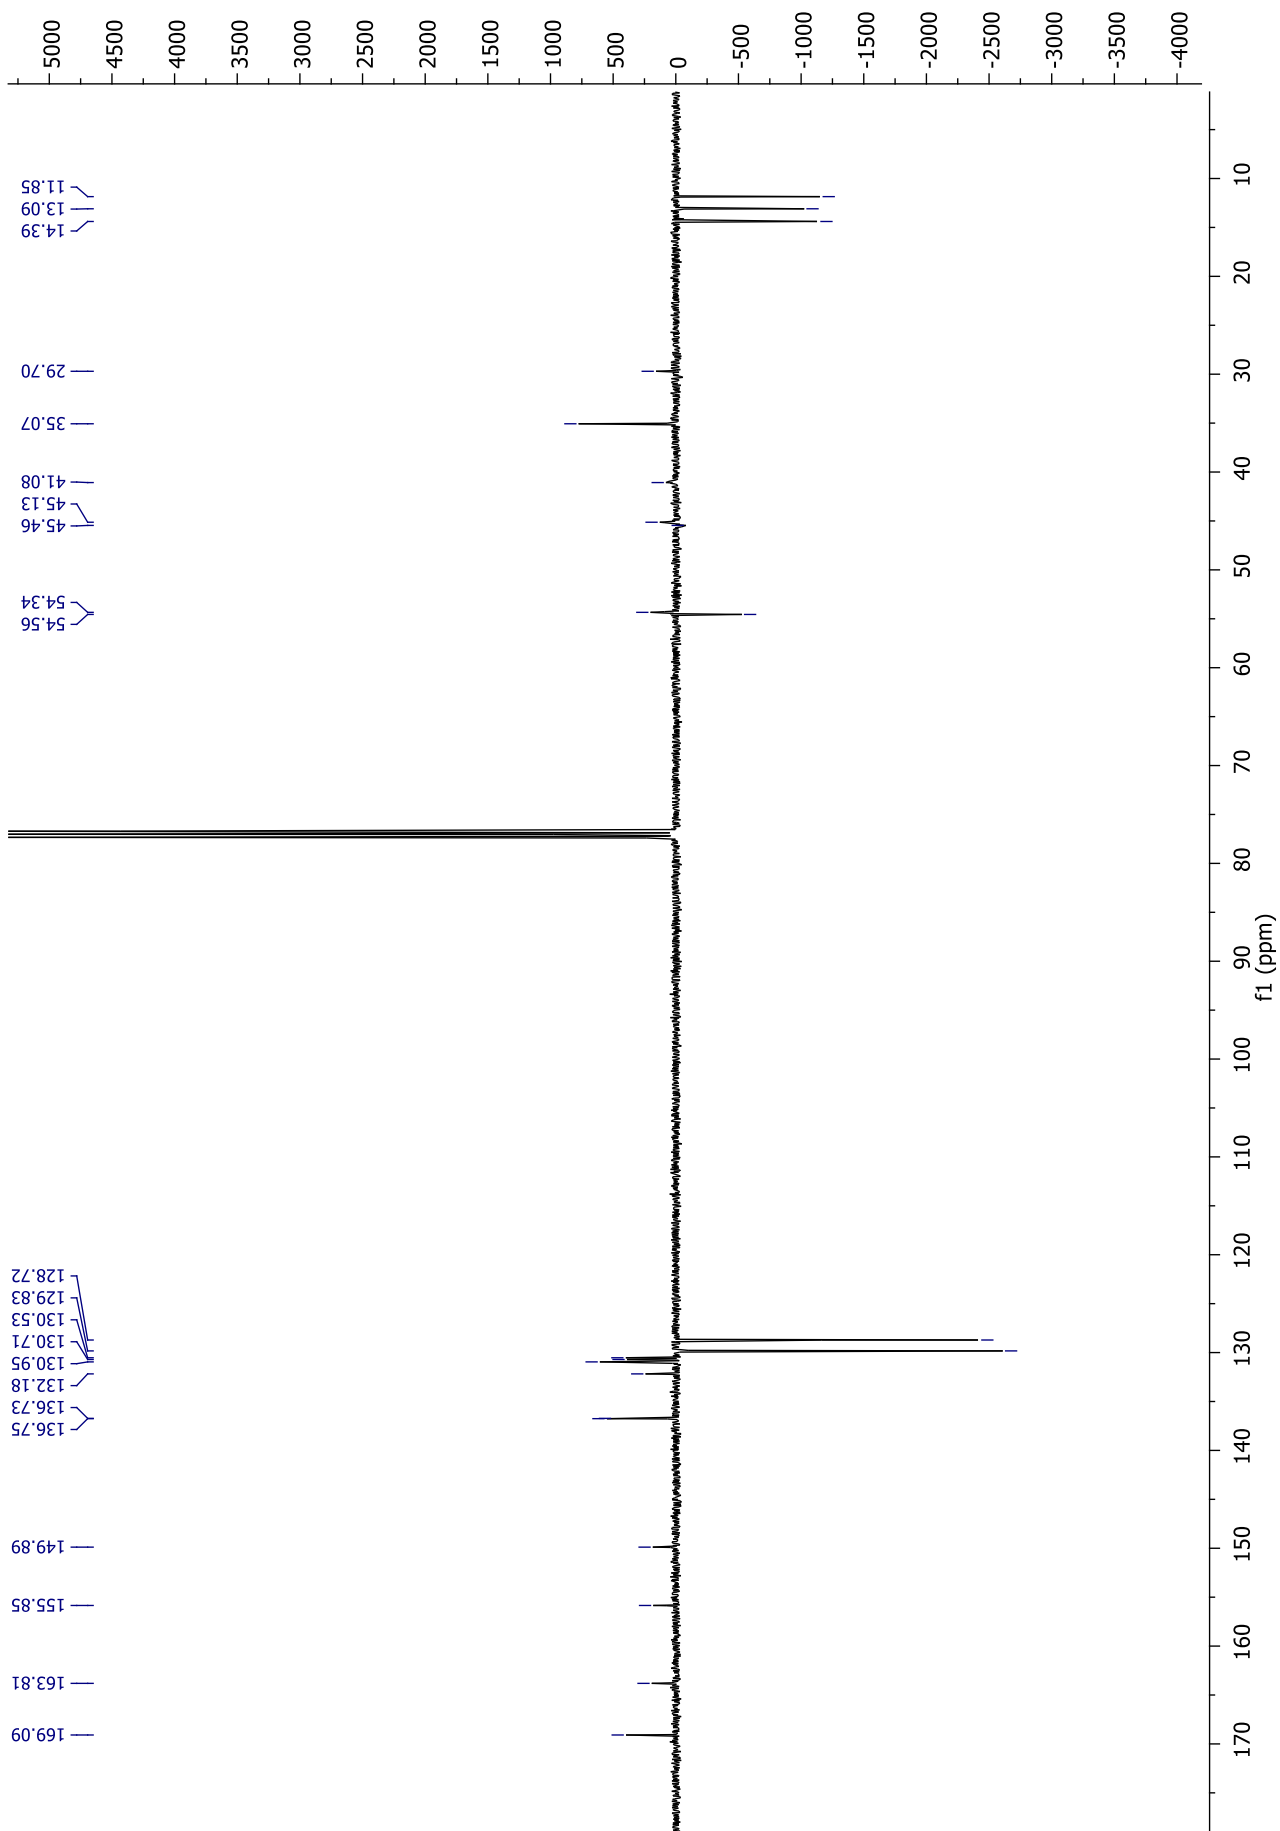



$^{13}\text{C}$  NMR (101 MHz,  $\text{DMSO-}d_6$ ) spectrum of compound **3**.

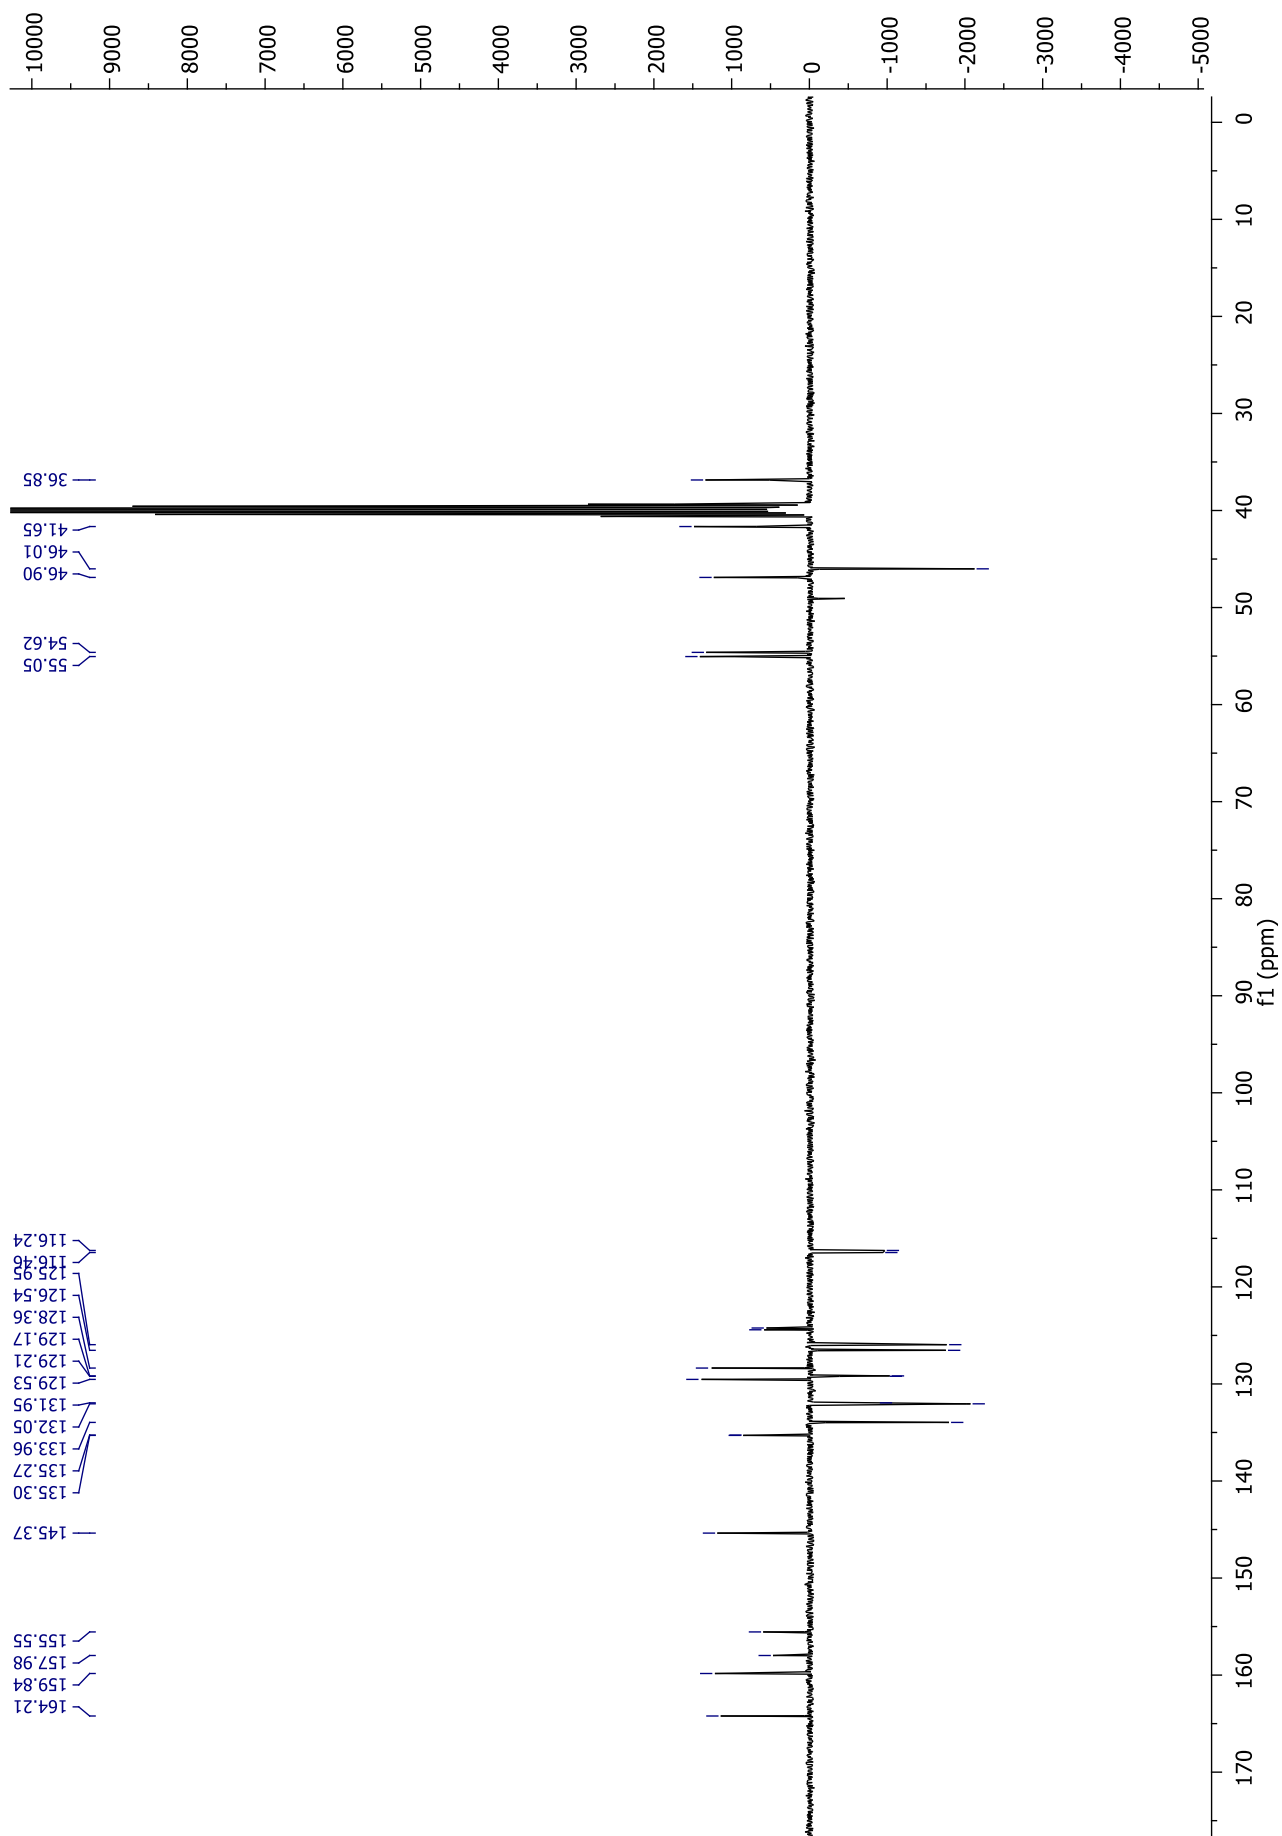

$^1\text{H}$  NMR (400 MHz,  $\text{CDCl}_3$ ) spectrum of compound 4.

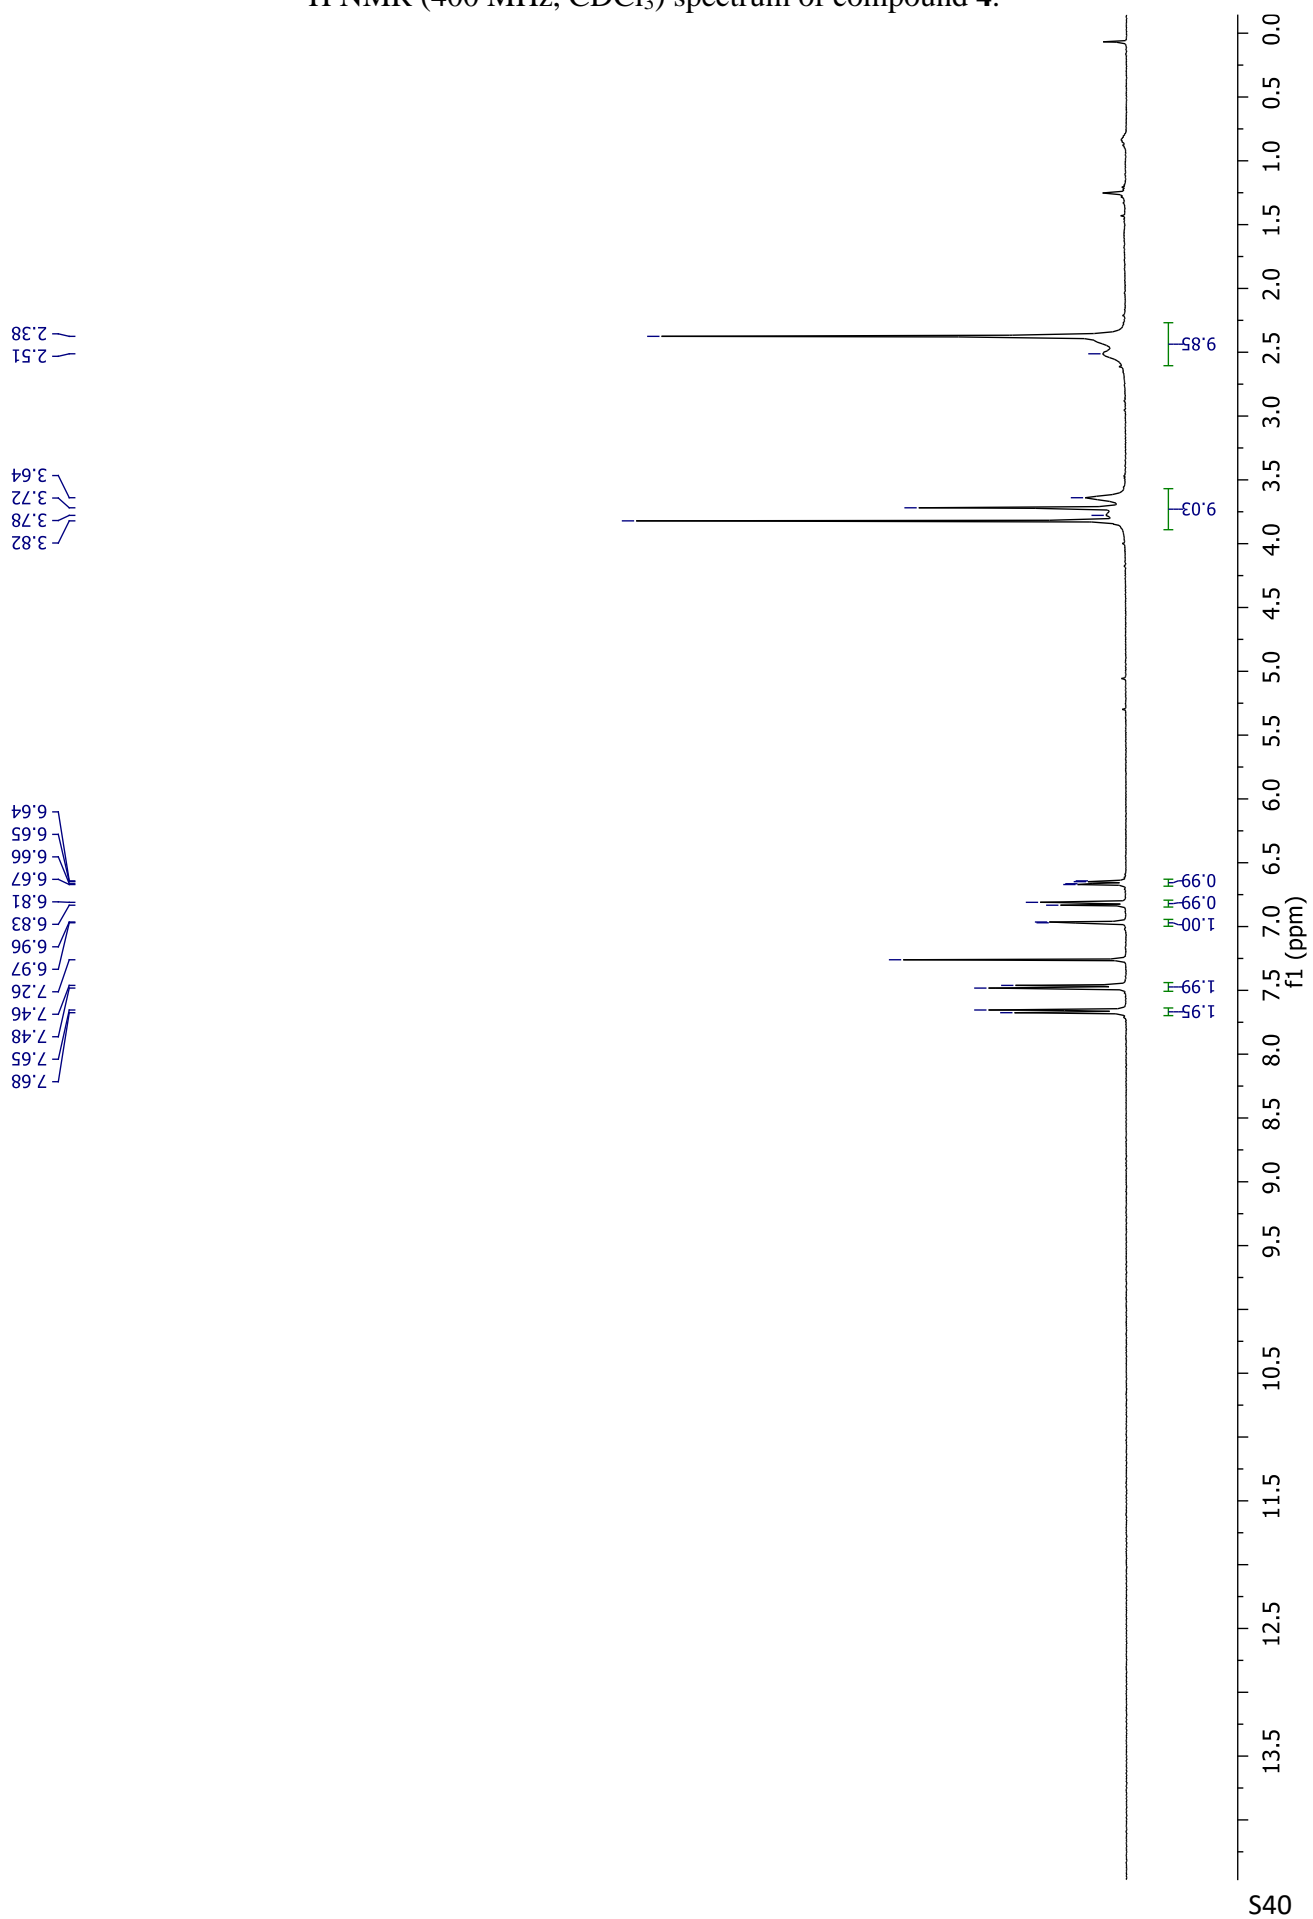



$^{13}\text{C}$  NMR (101 MHz,  $\text{CDCl}_3$ ) spectrum of compound **4**.

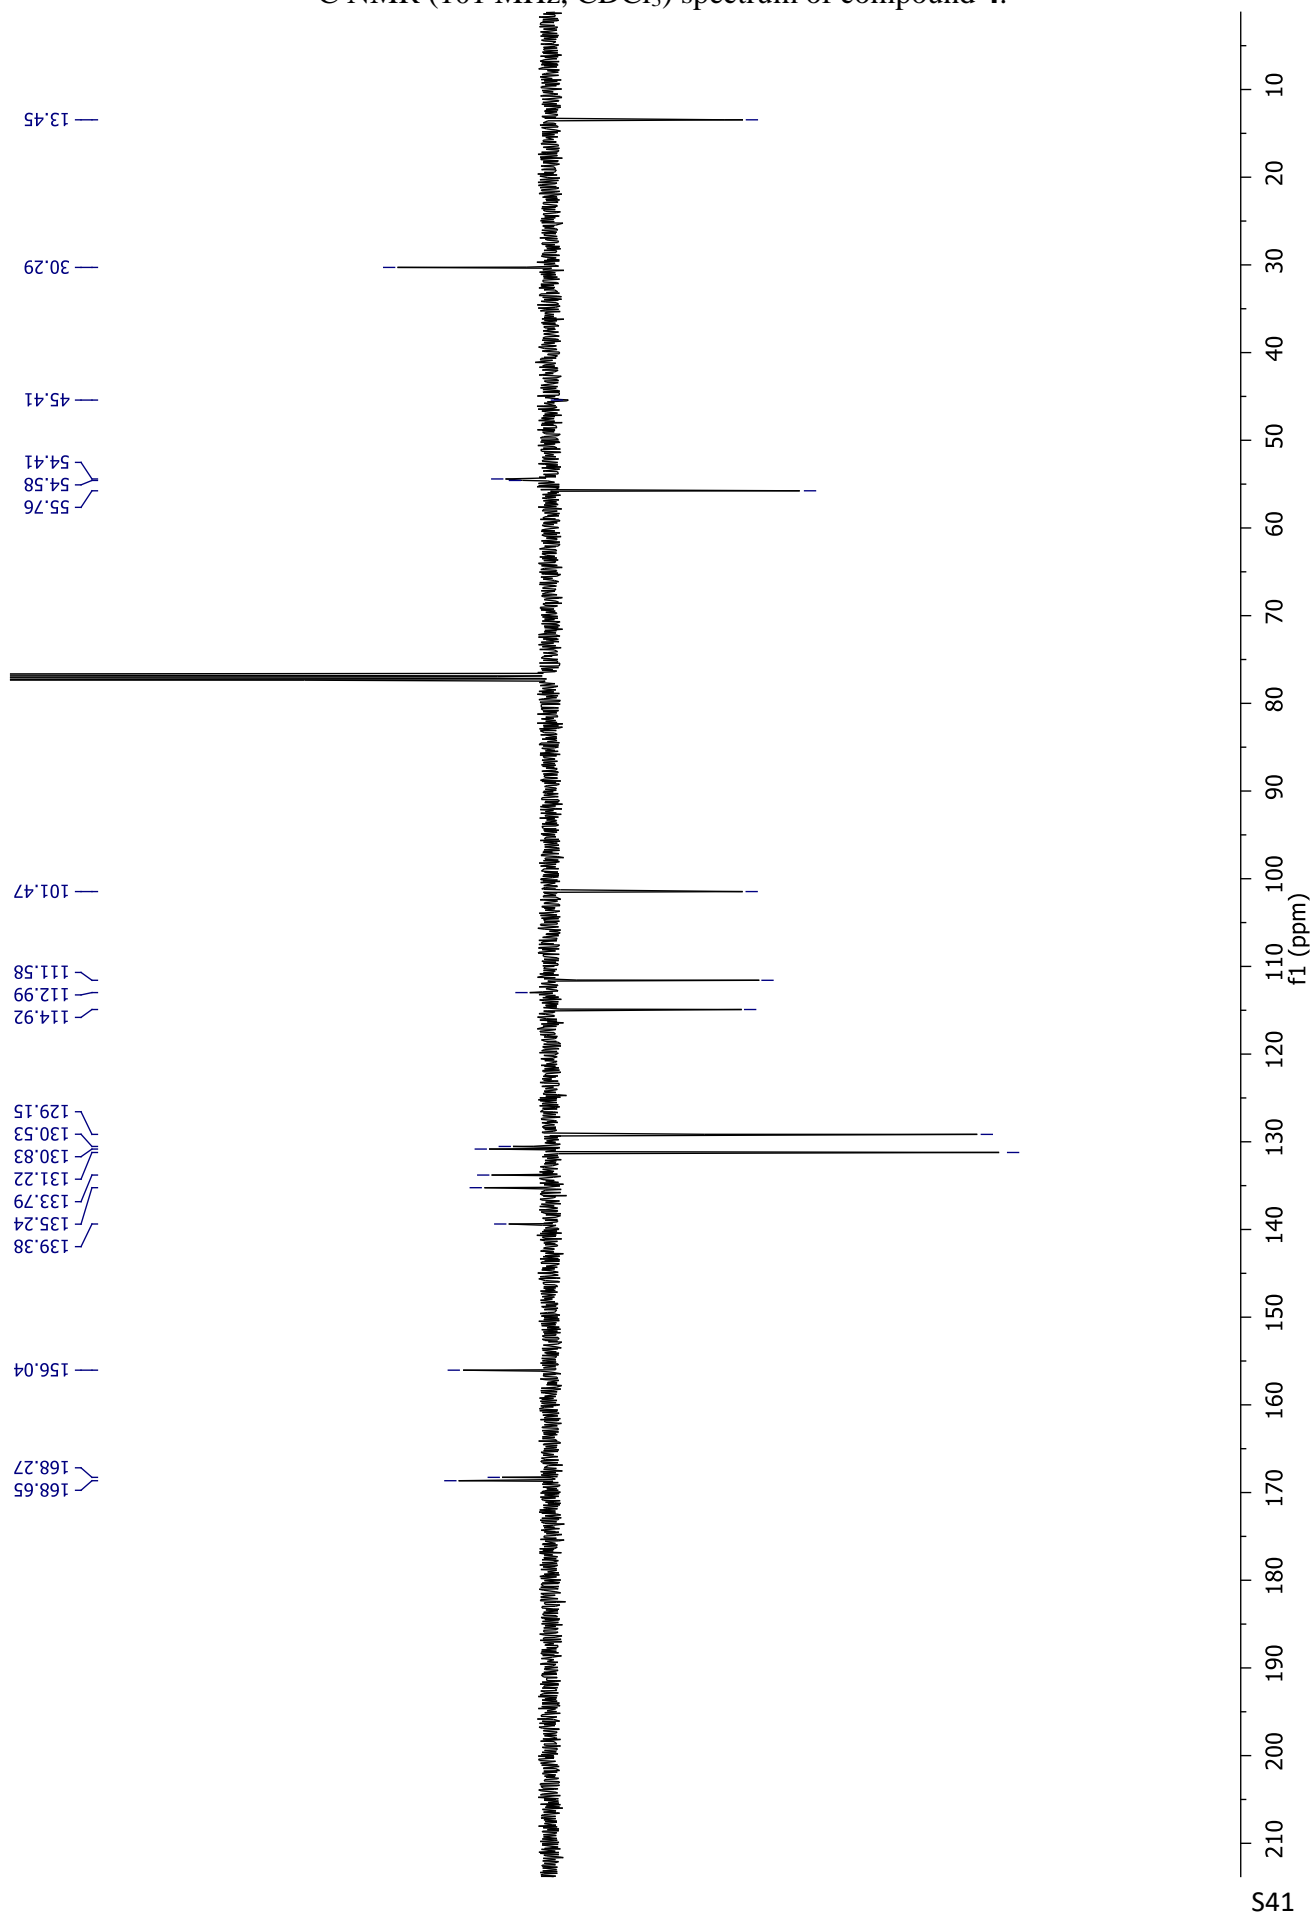

$^1\text{H}$  NMR (400 MHz,  $\text{CDCl}_3$ ) spectrum of compound 5.

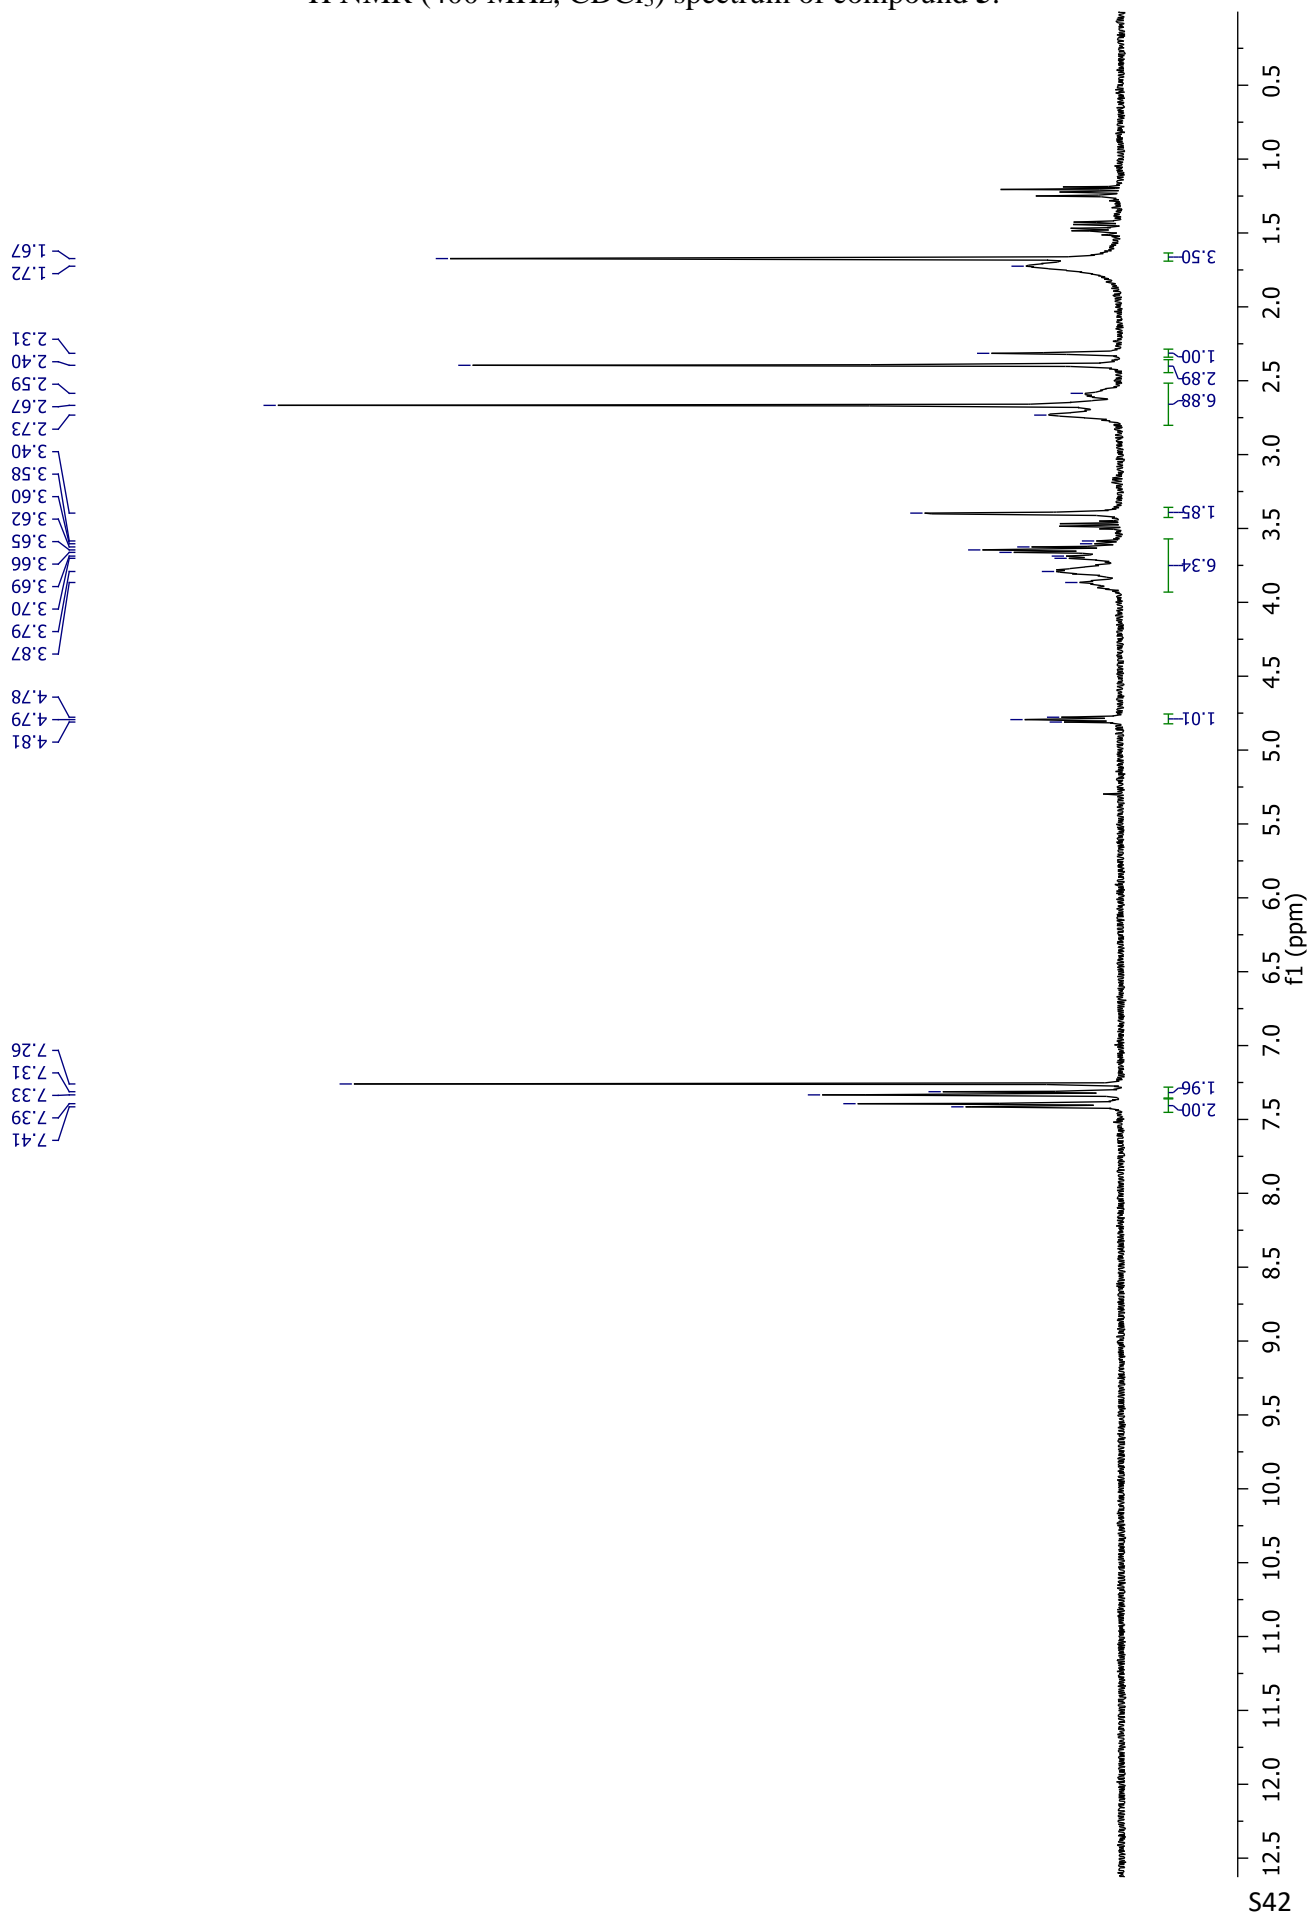

$^1\text{H}$  NMR (400 MHz,  $\text{DMSO-}d_6$ ) spectrum of compound 7.

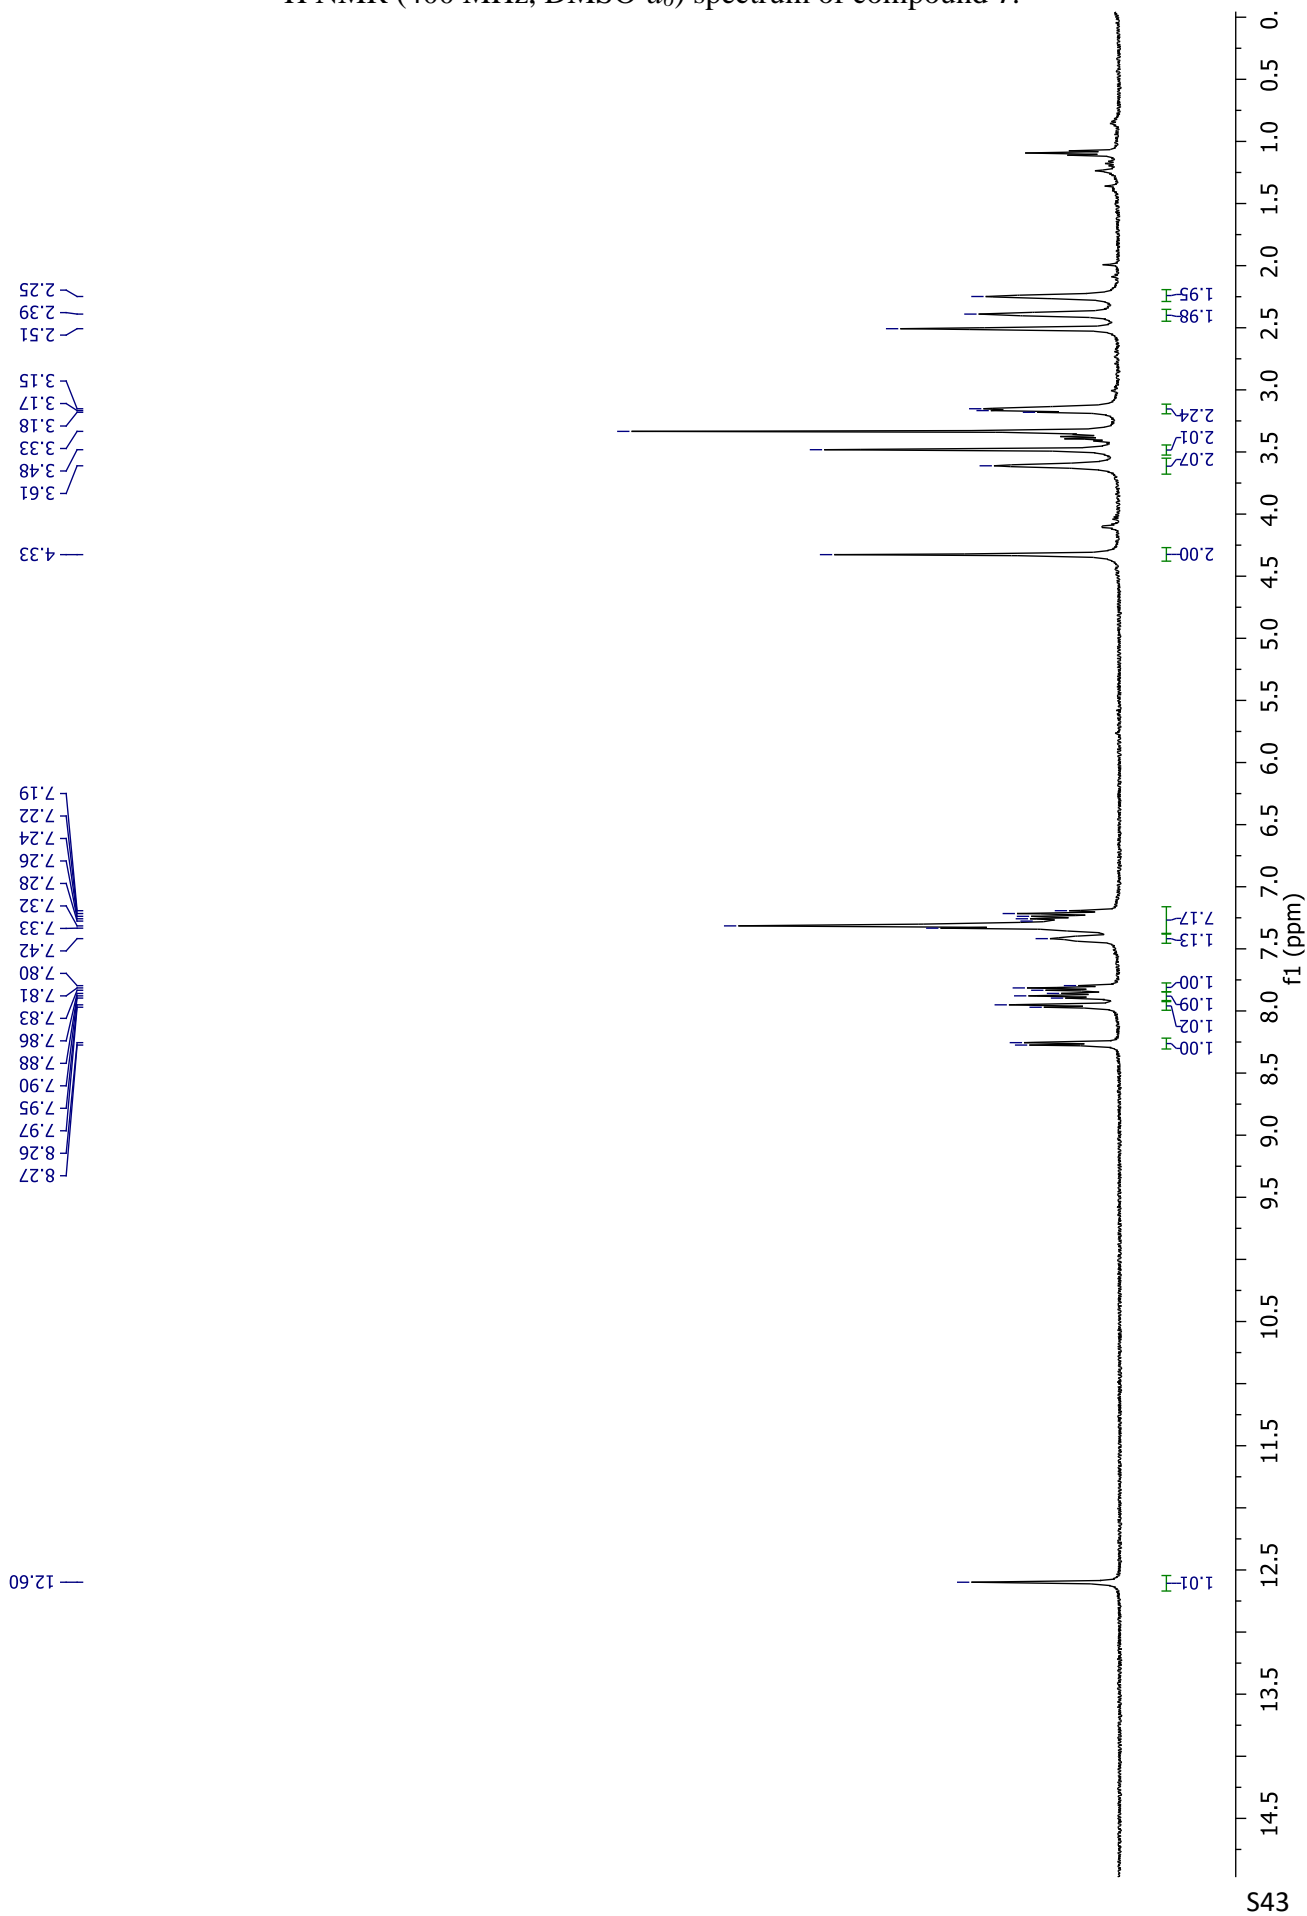

$^{13}\text{C}$  NMR (101 MHz,  $\text{DMSO-}d_6$ ) spectrum of compound 7.

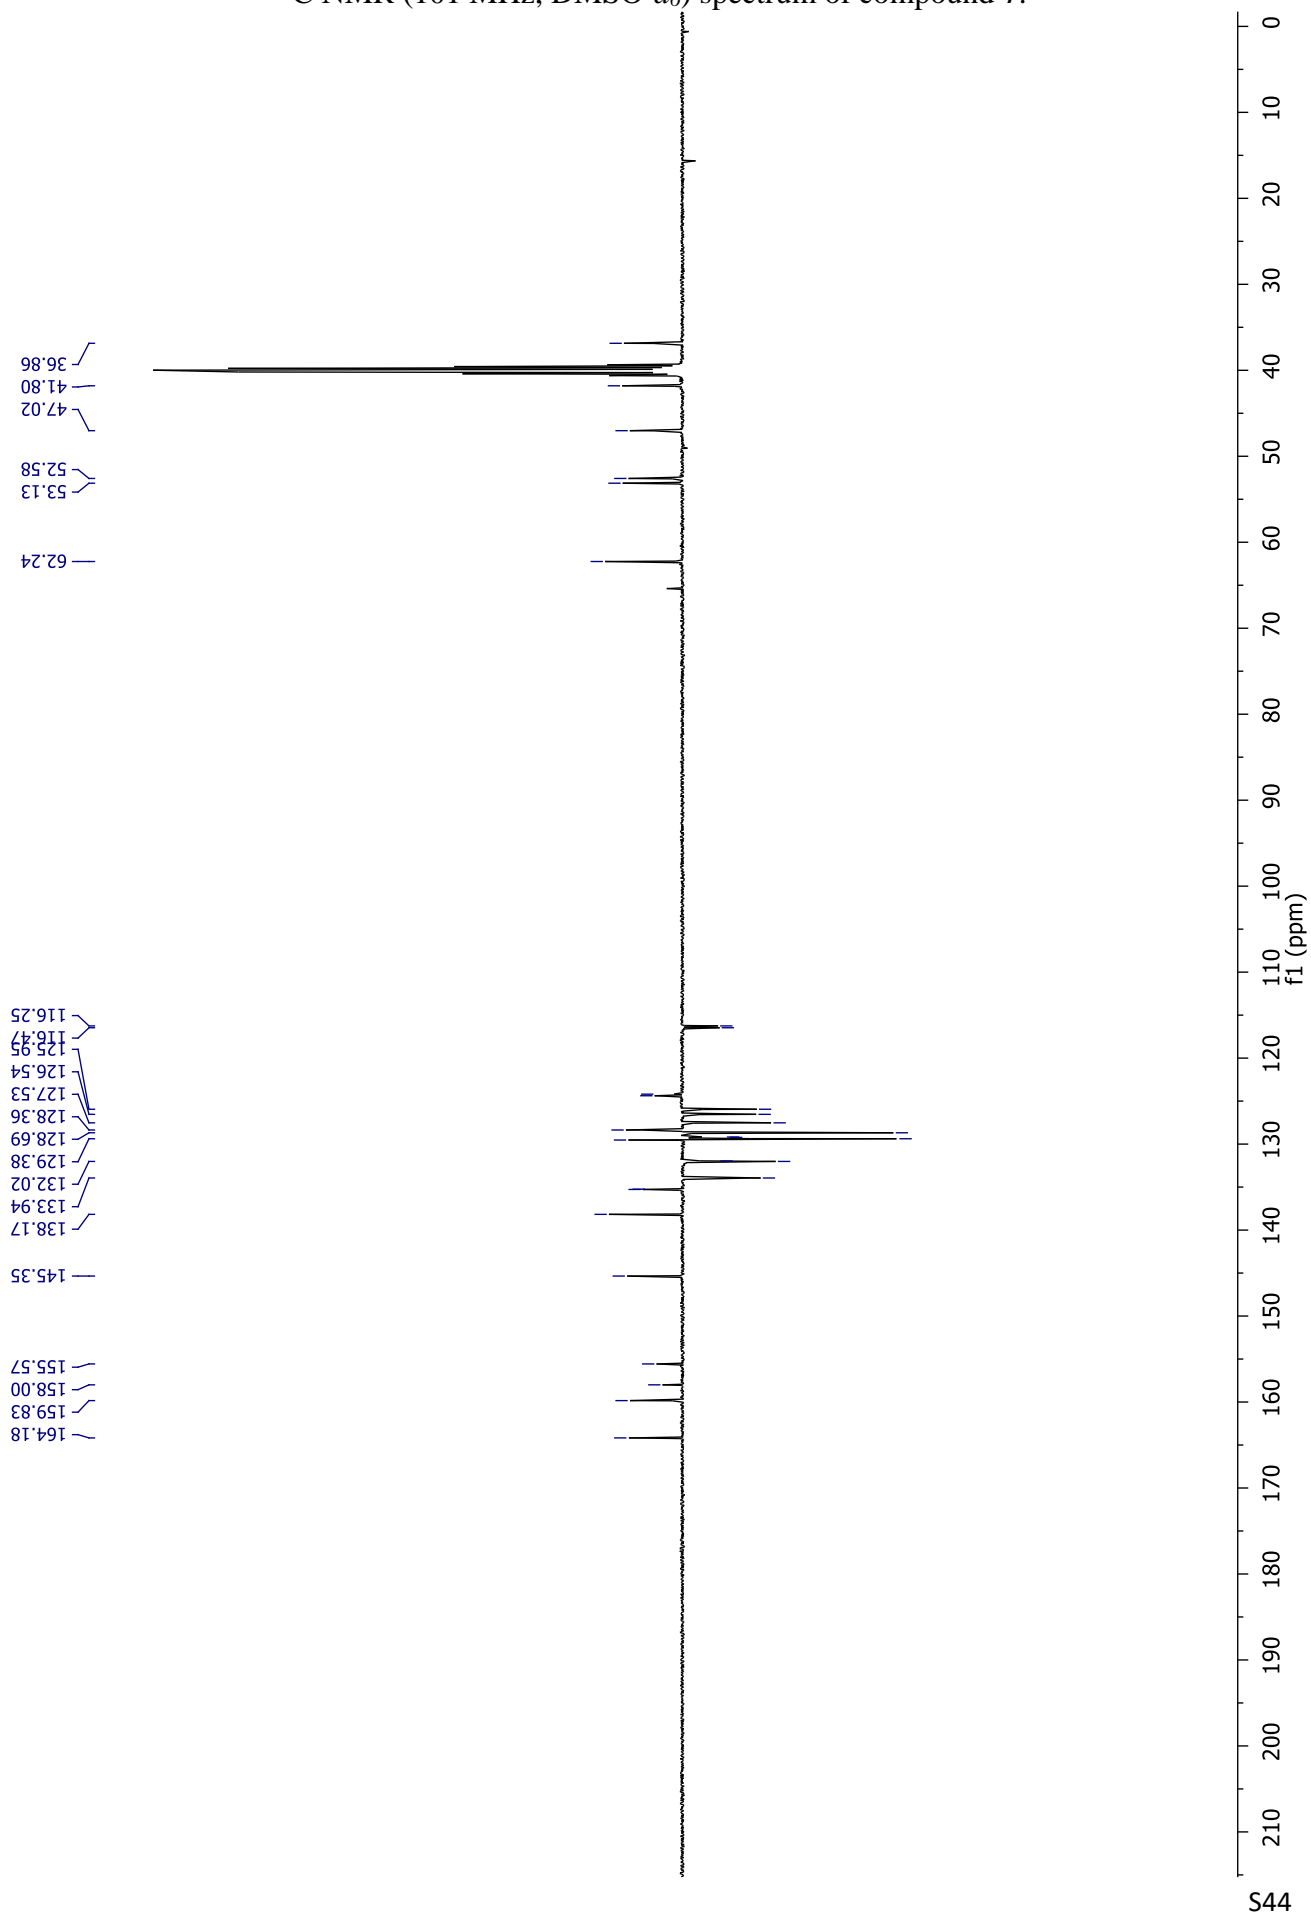

$^1\text{H}$  NMR (400 MHz,  $\text{DMSO-}d_6$ ) spectrum of compound **8**.

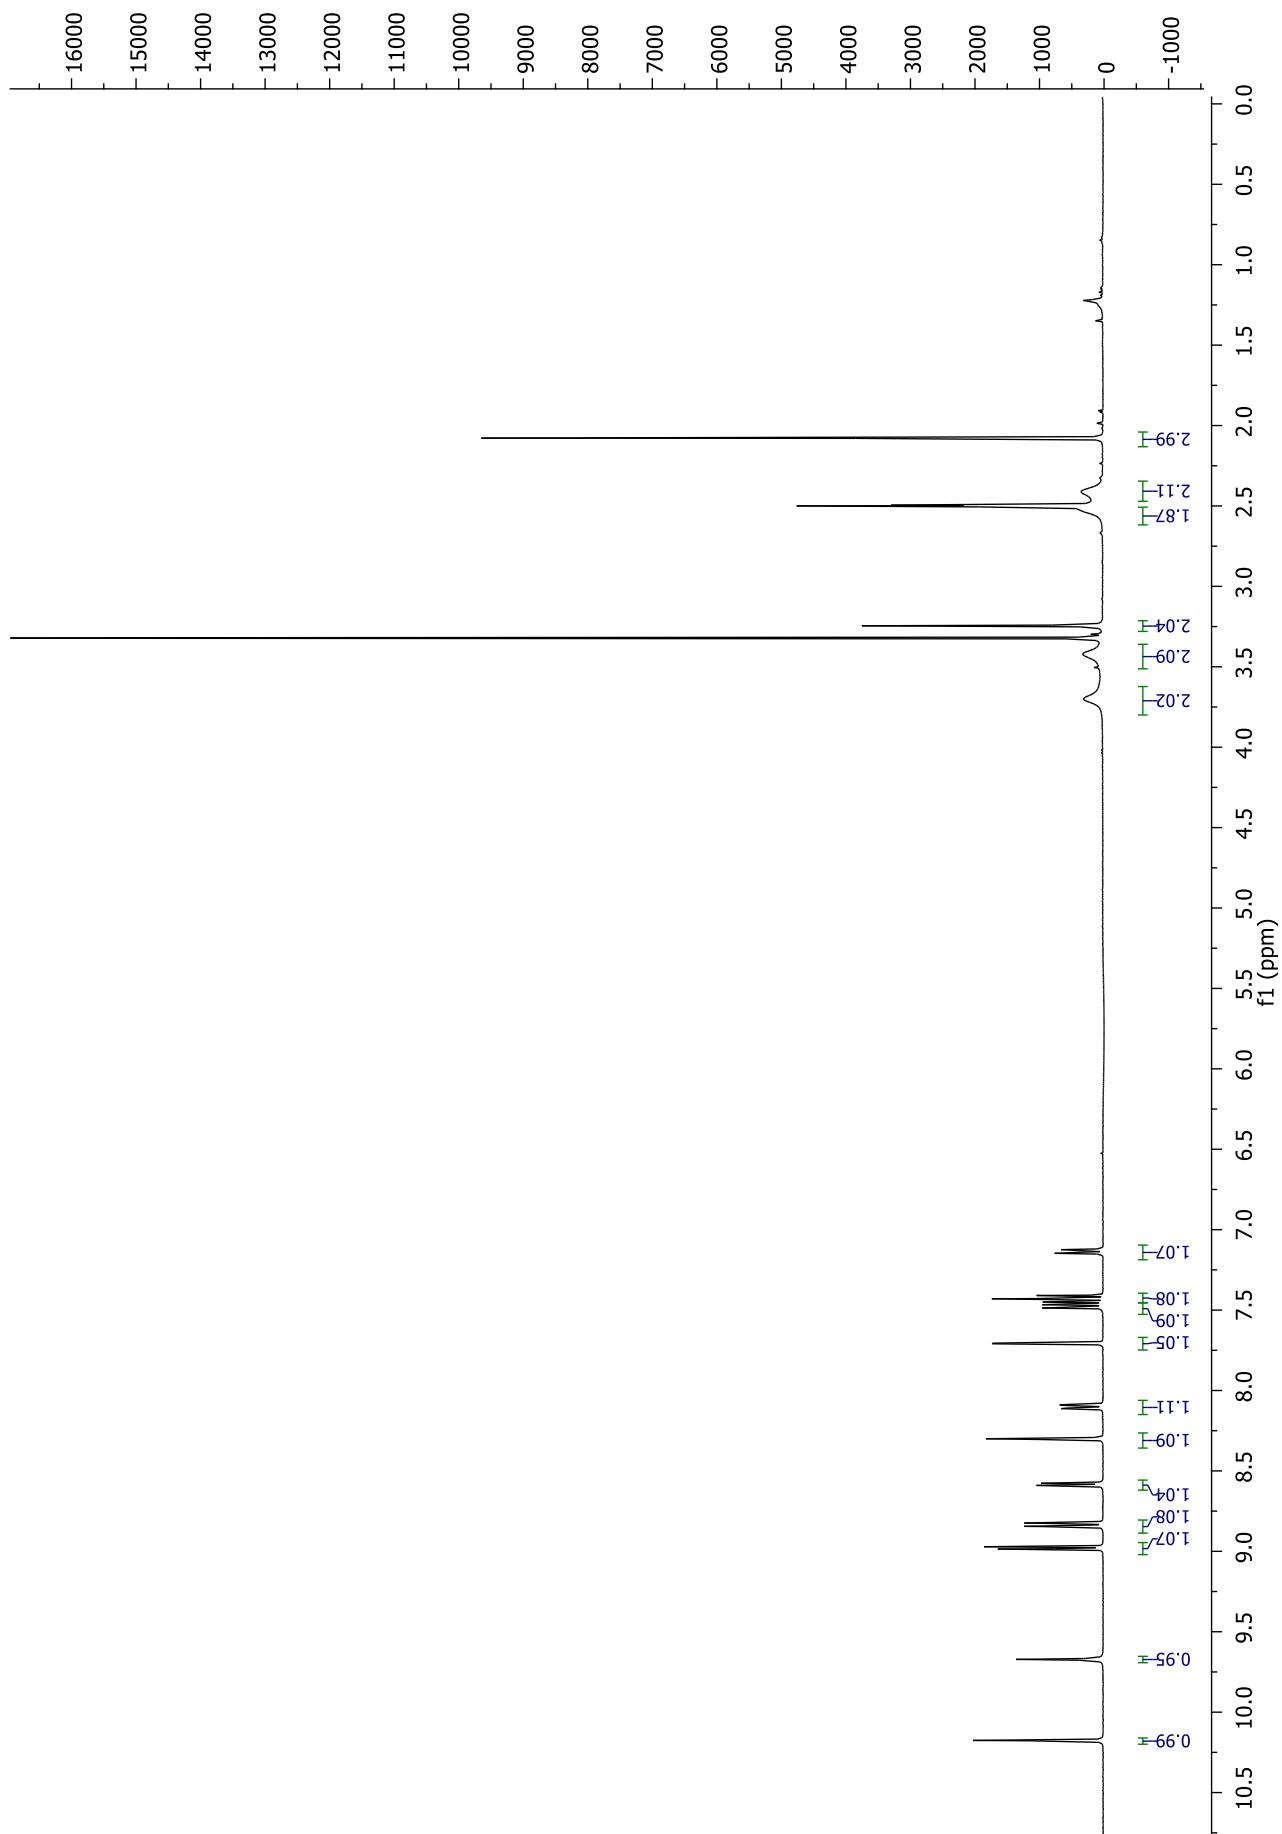

$^{13}\text{C}$  NMR (101 MHz,  $\text{DMSO-}d_6$ ) spectrum of compound **8**.

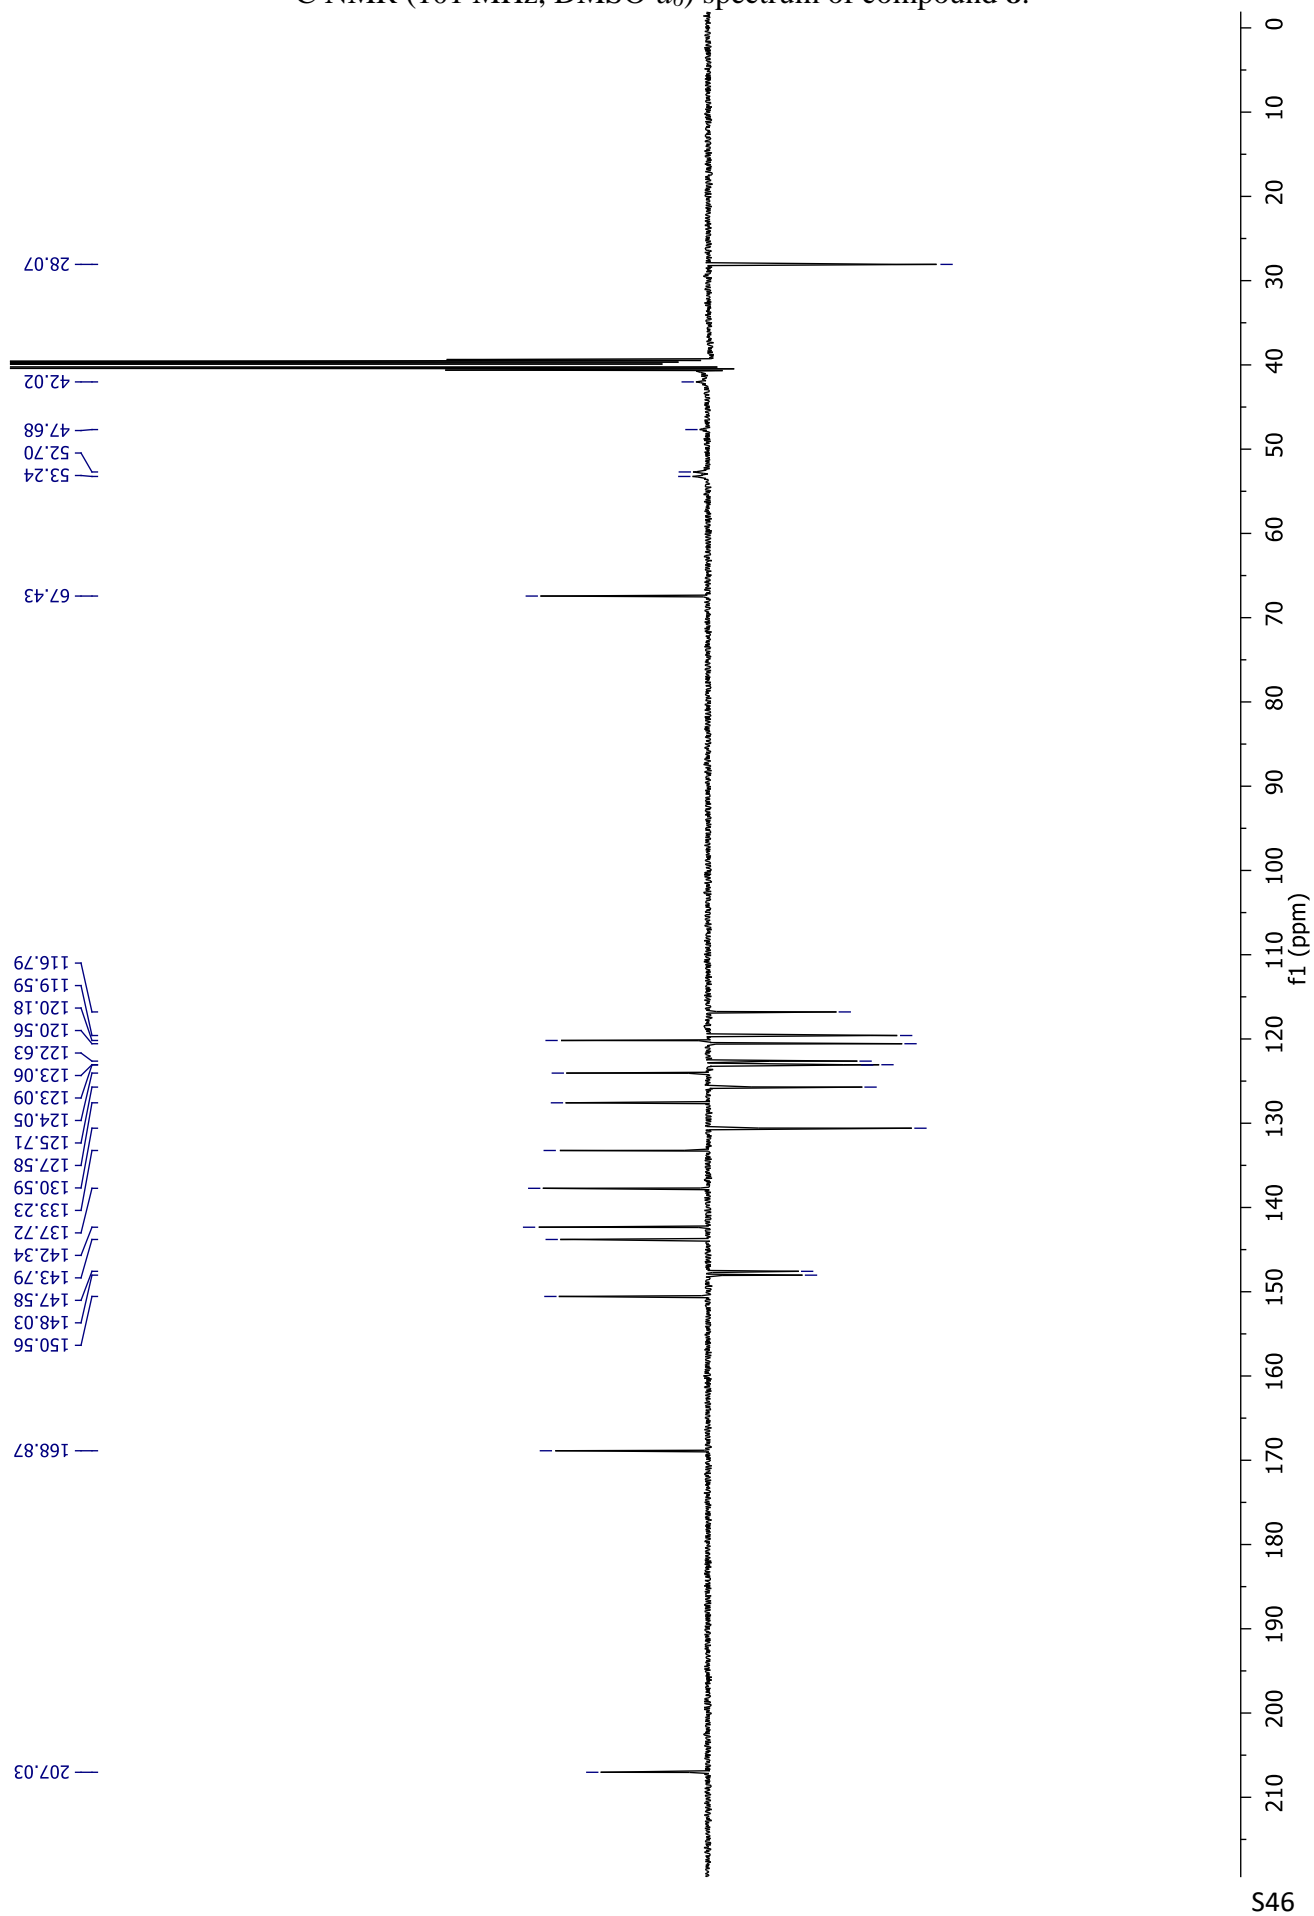

$^1\text{H}$  NMR (400 MHz,  $\text{CDCl}_3$ ) spectrum of compound **9**.

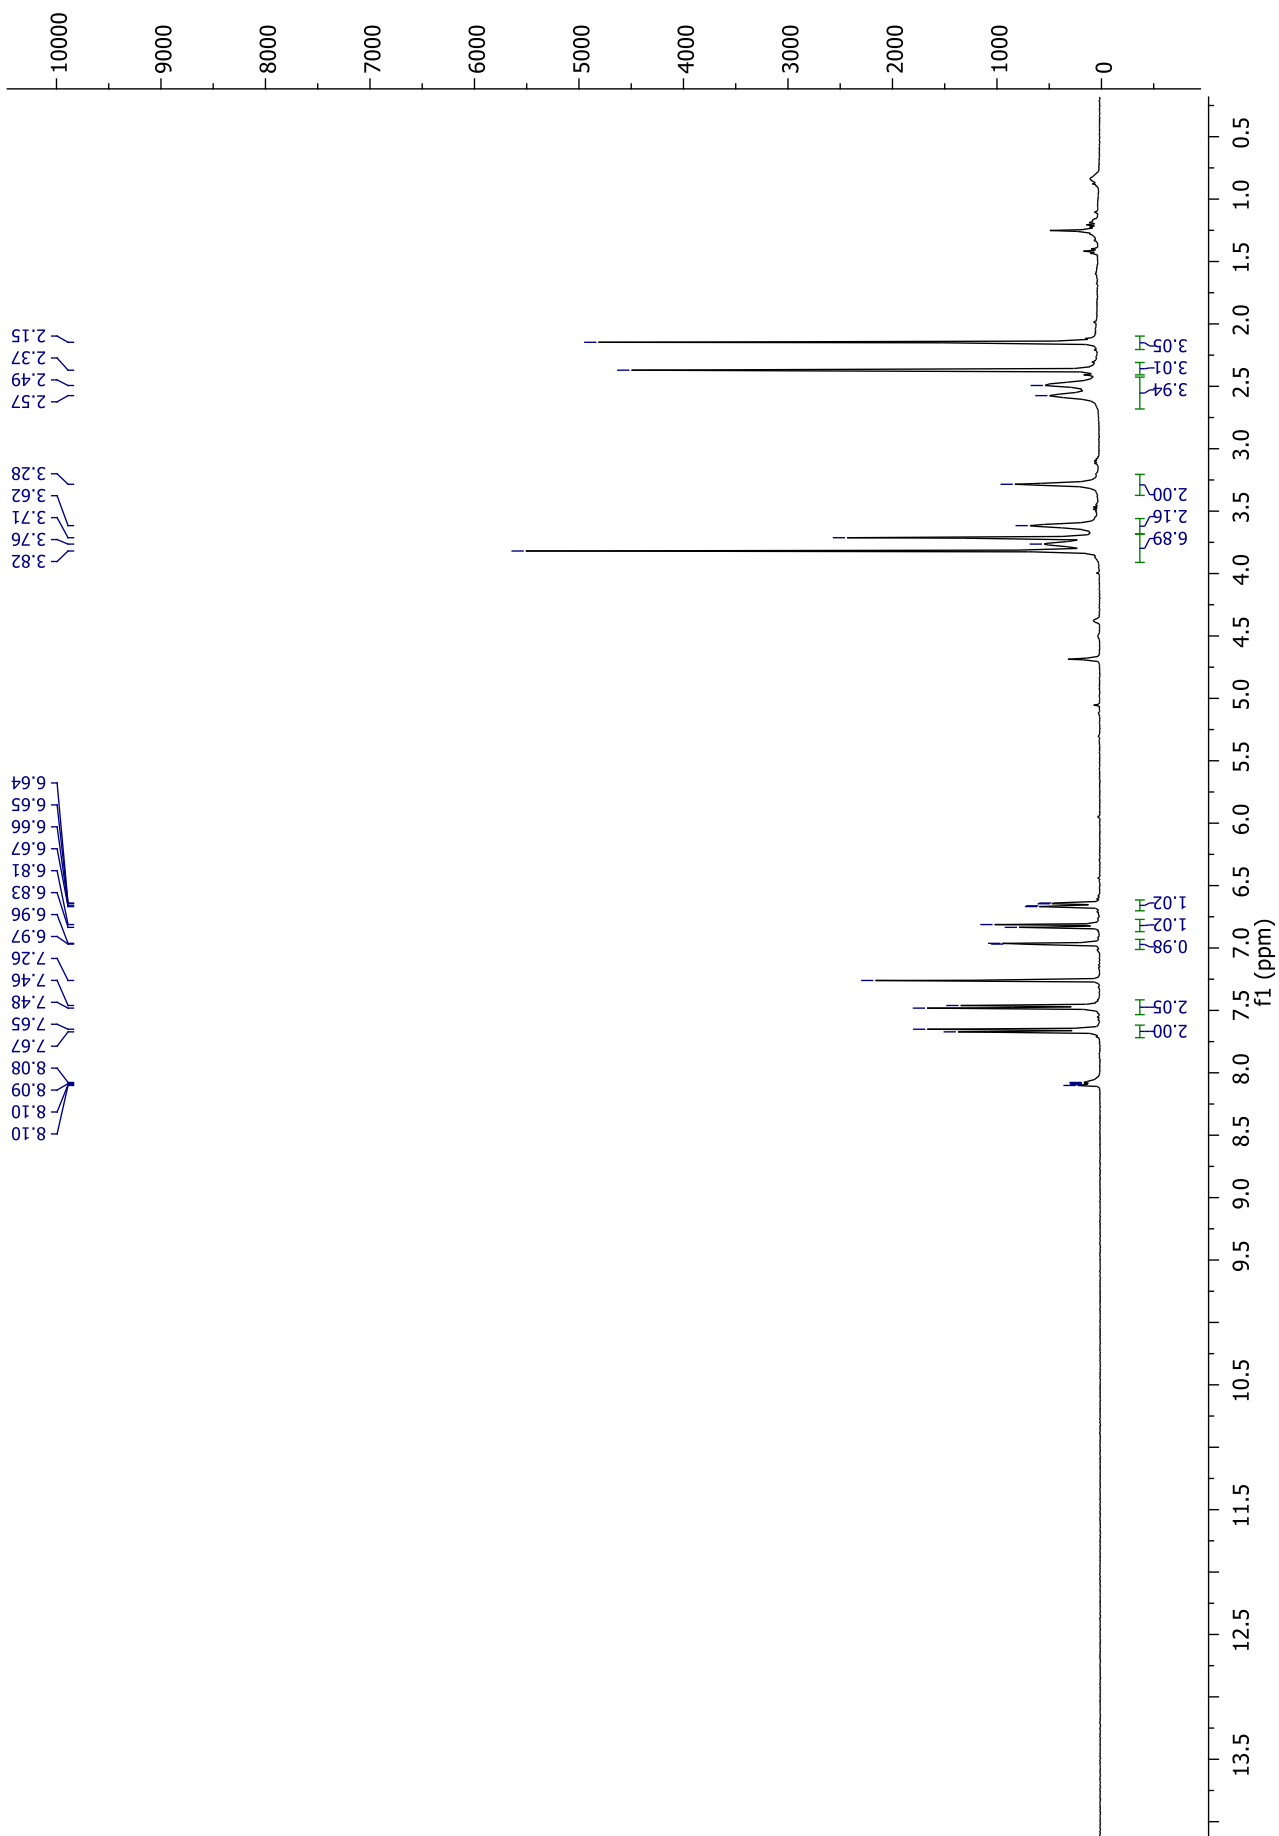

$^{13}\text{C}$  NMR (101 MHz,  $\text{CDCl}_3$ ) spectrum of compound **9**.

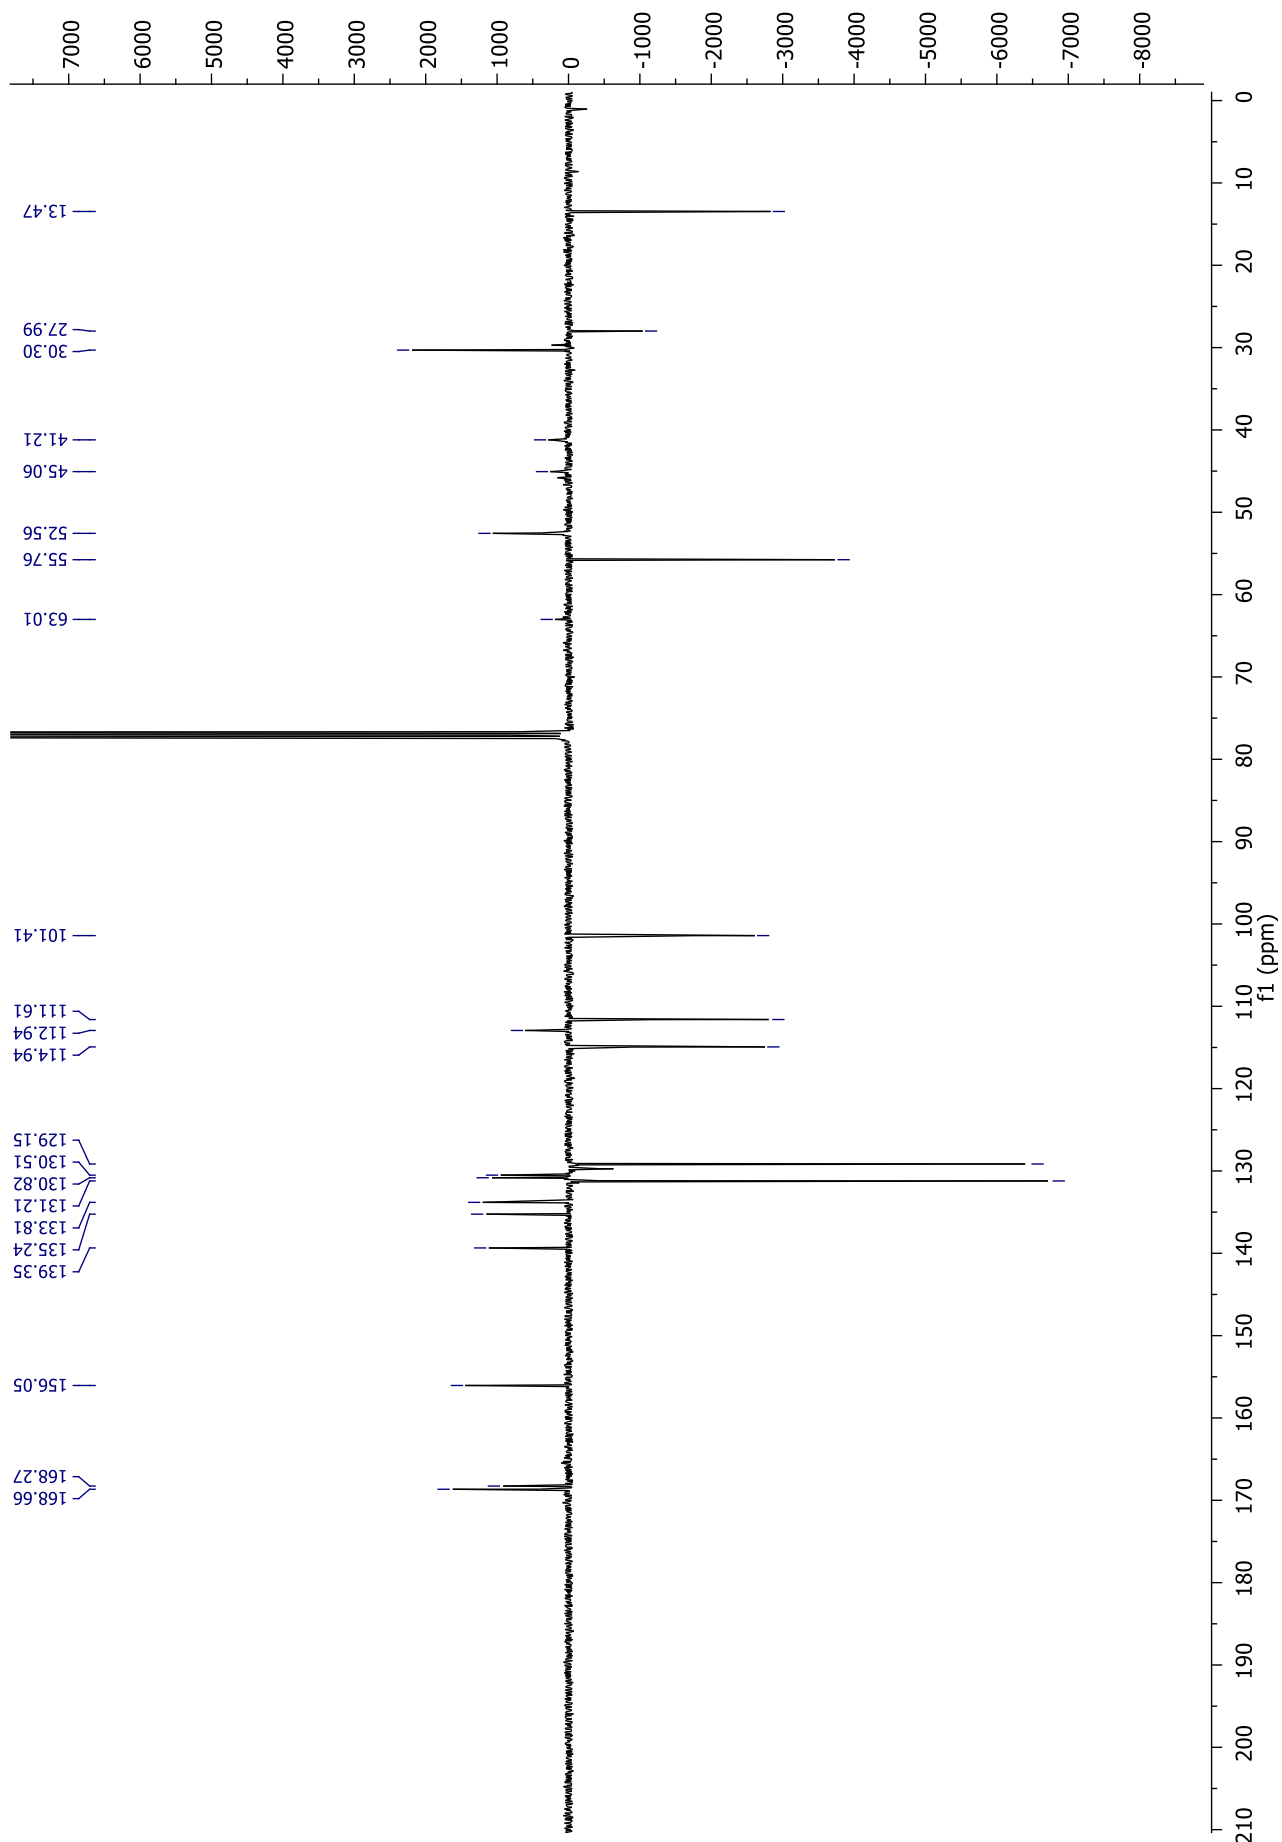



$^1\text{H}$  NMR (400 MHz,  $\text{CDCl}_3$ ) spectrum of compound **10**.

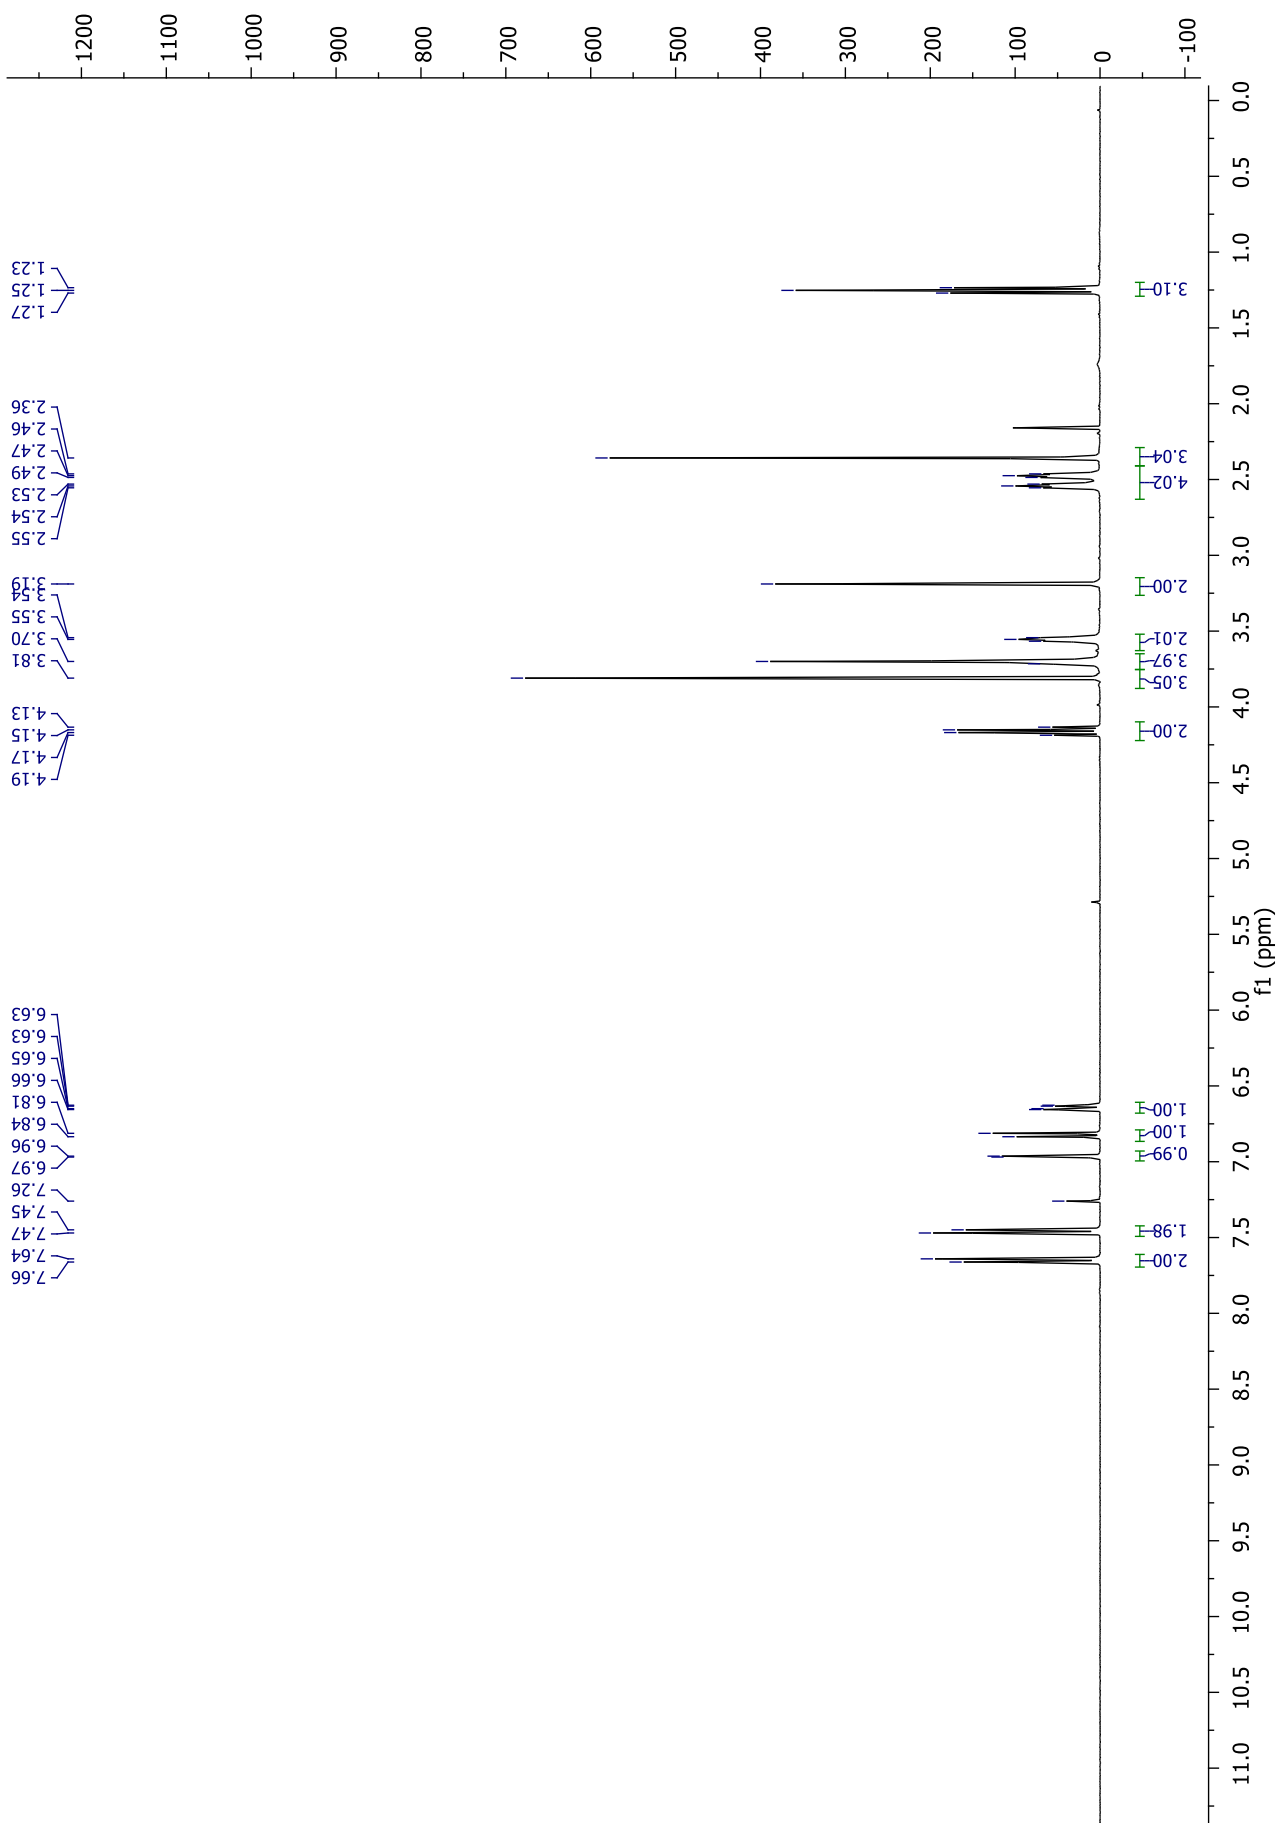

<sup>13</sup>C NMR (101 MHz, CDCl<sub>3</sub>) spectrum of compound **10**.

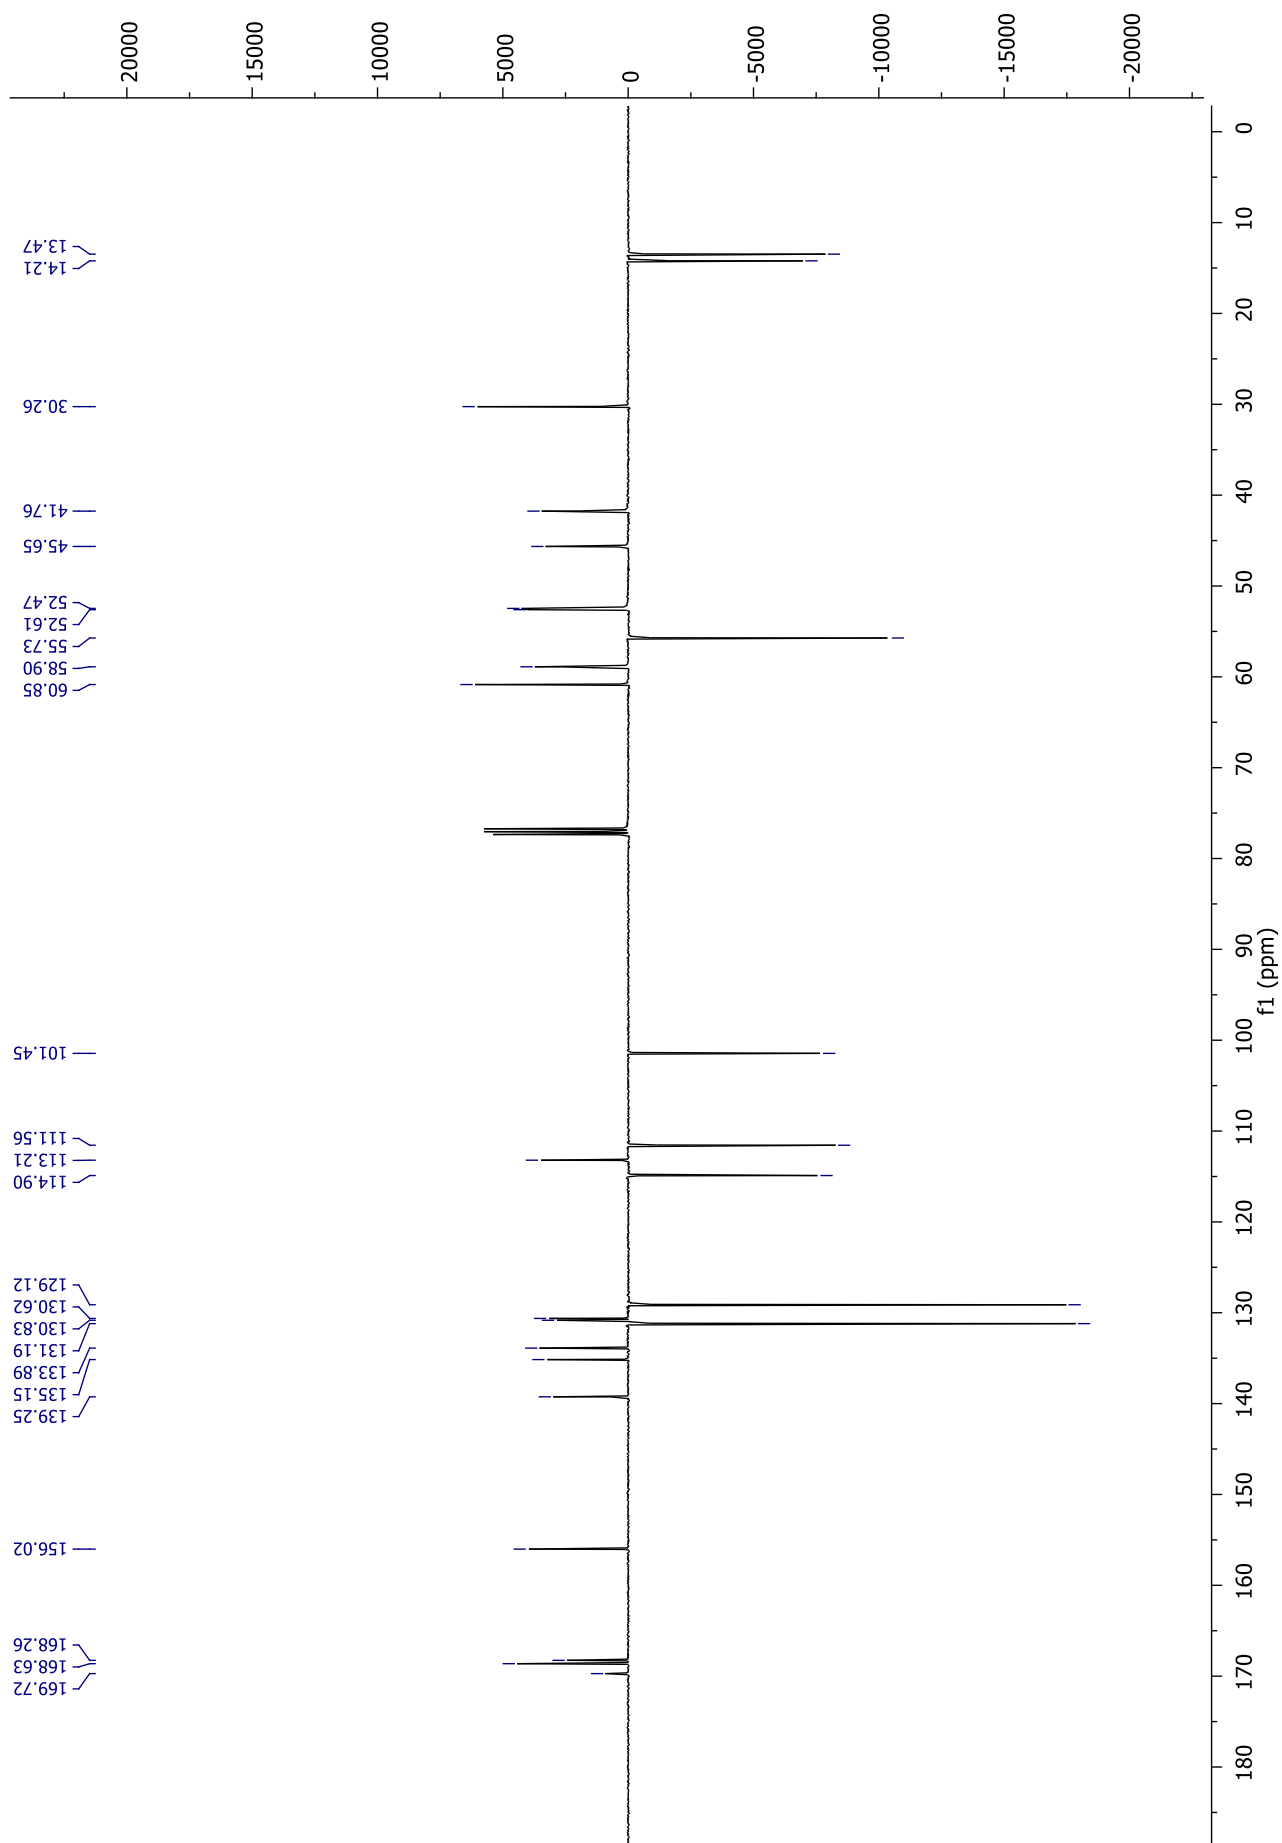

$^1\text{H}$  NMR (400 MHz,  $\text{CDCl}_3$ ) spectrum of compound **11**.

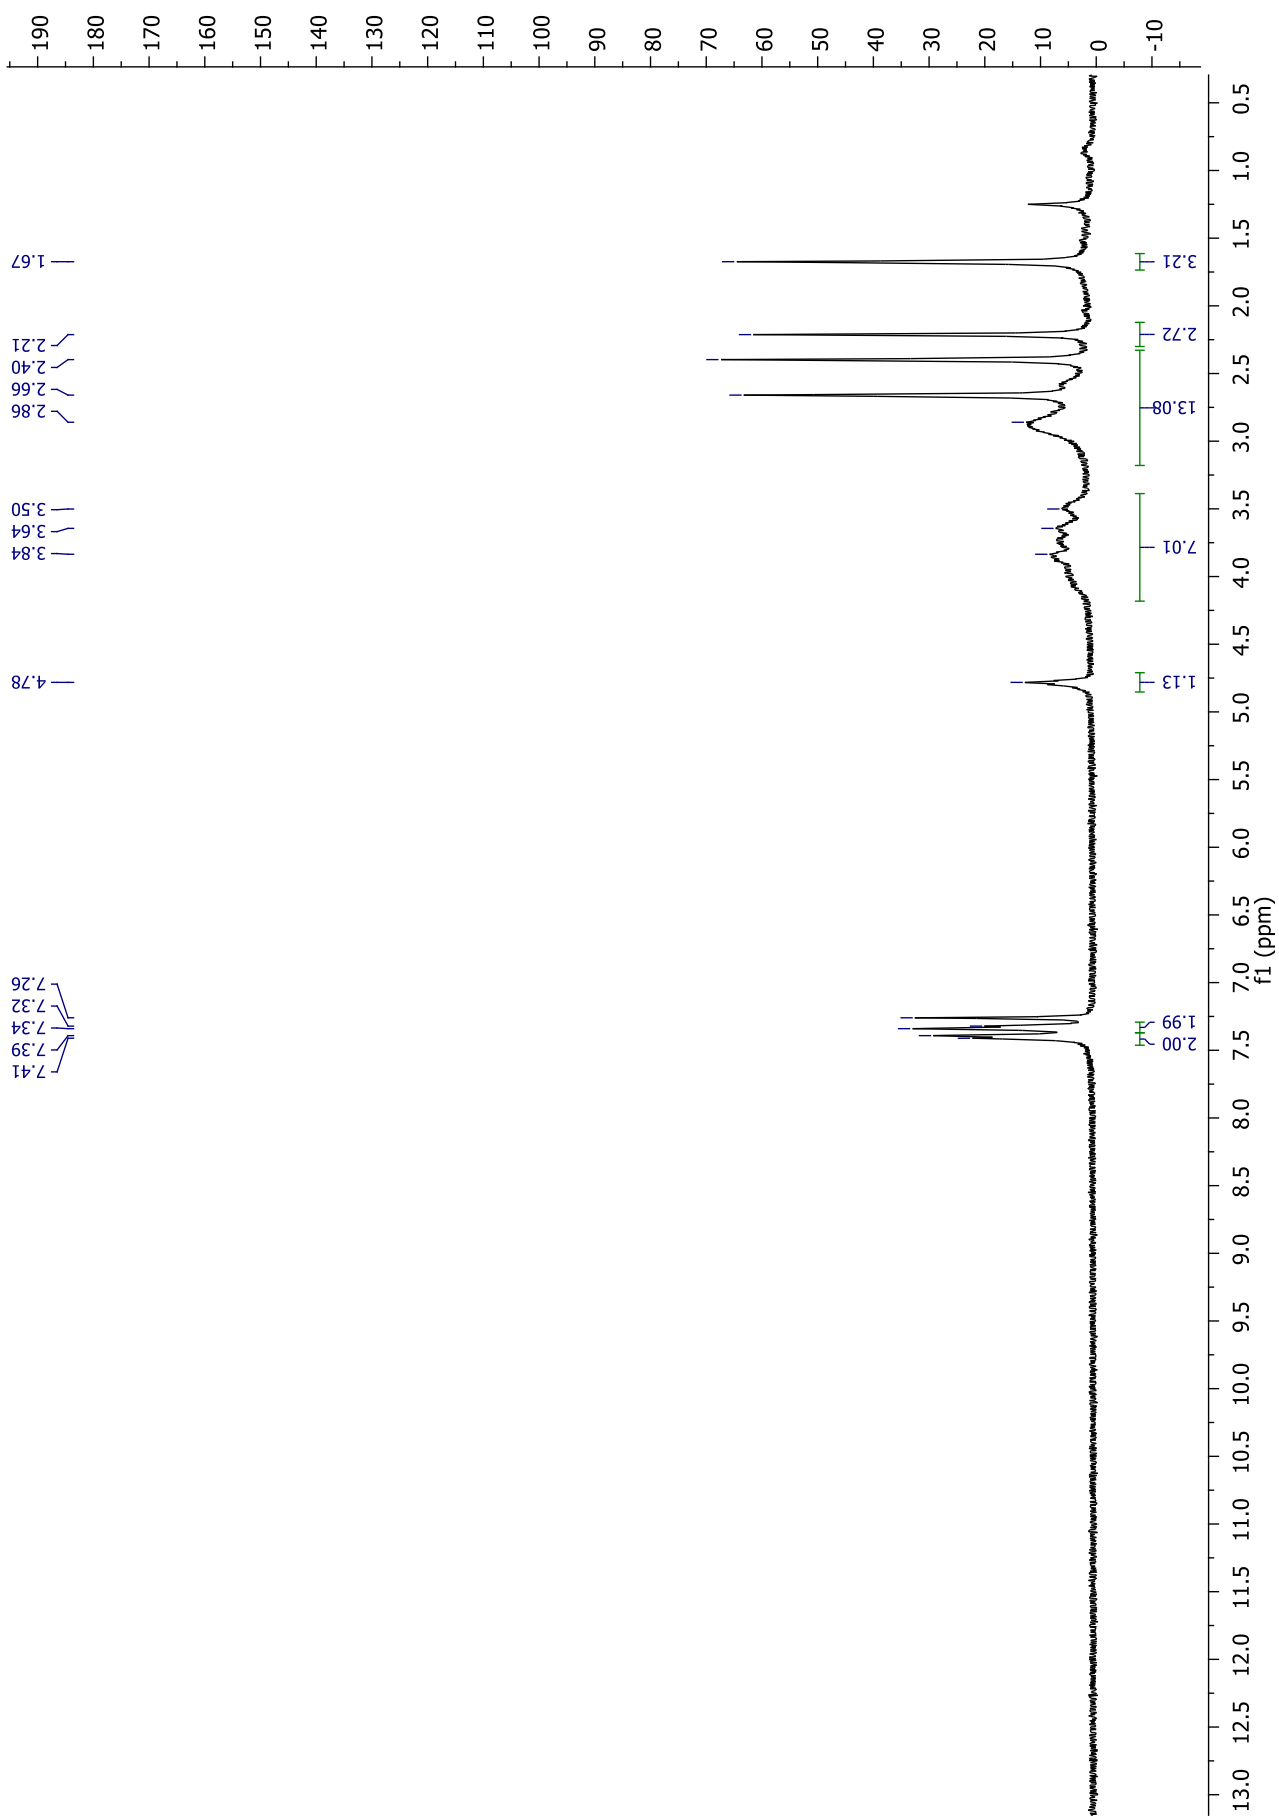

$^1\text{H}$  NMR (400 MHz,  $\text{CDCl}_3$ ) spectrum of compound **12**.

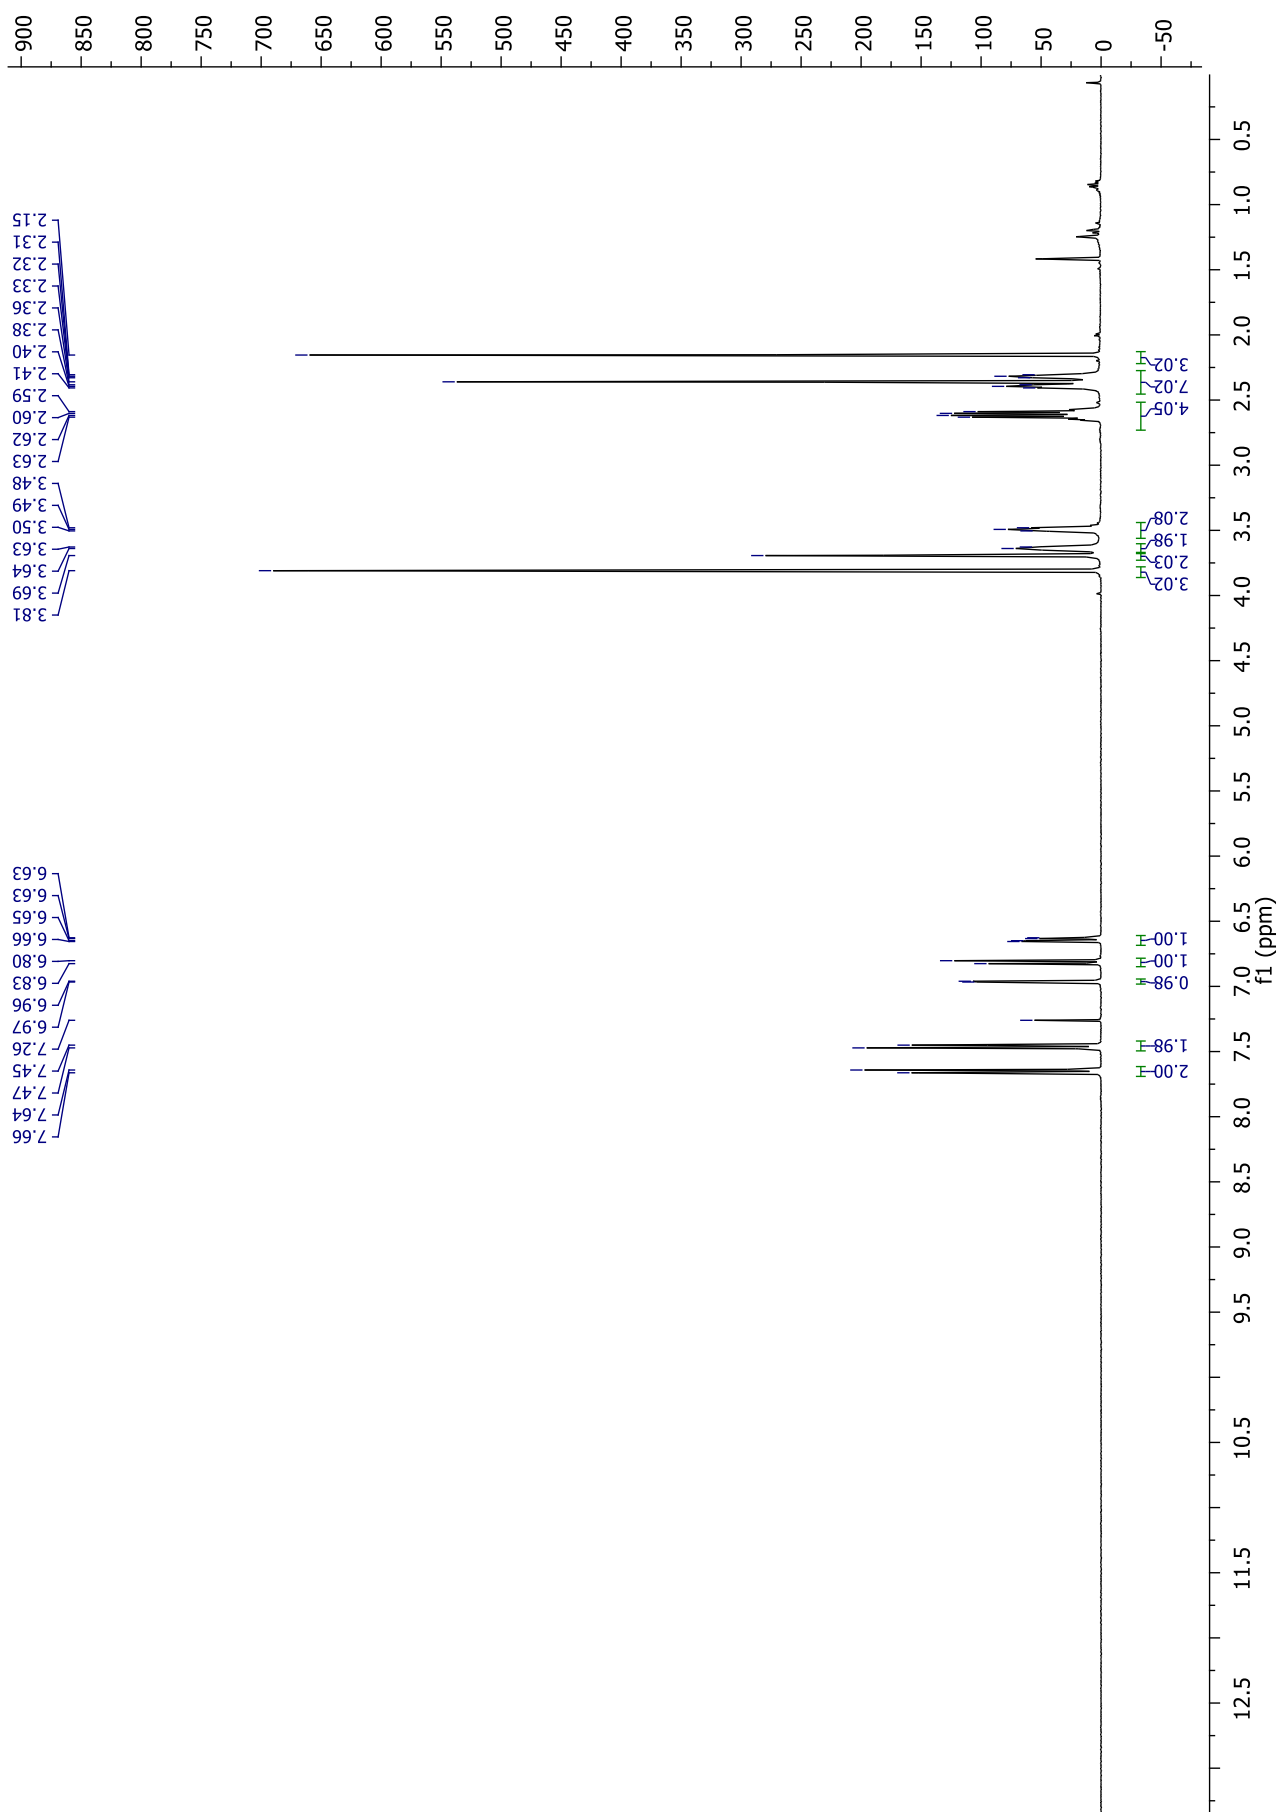

$^{13}\text{C}$  NMR (101 MHz,  $\text{CDCl}_3$ ) spectrum of compound **12**.

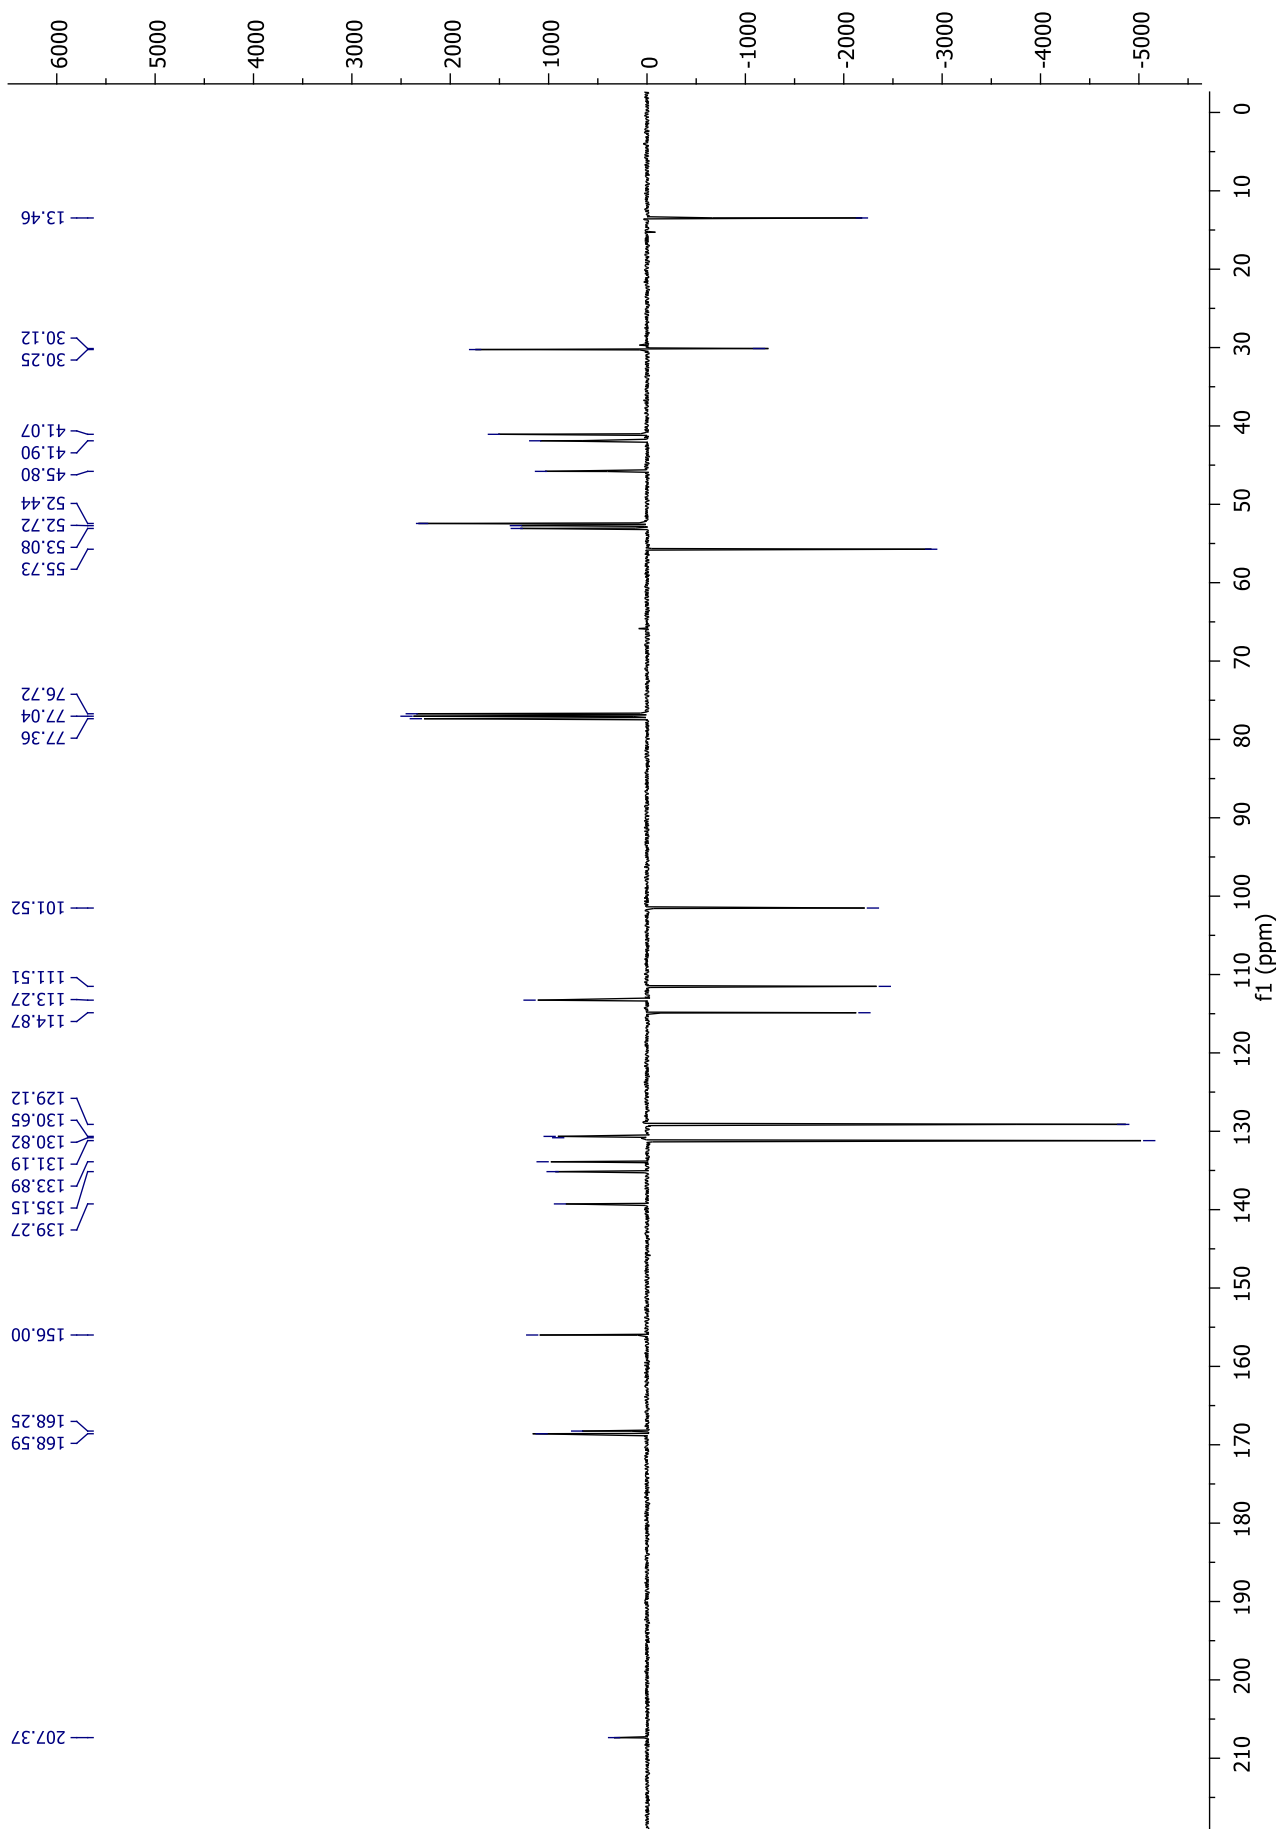

$^1\text{H}$  NMR (400 MHz,  $\text{CDCl}_3$ ) spectrum of compound **13**.

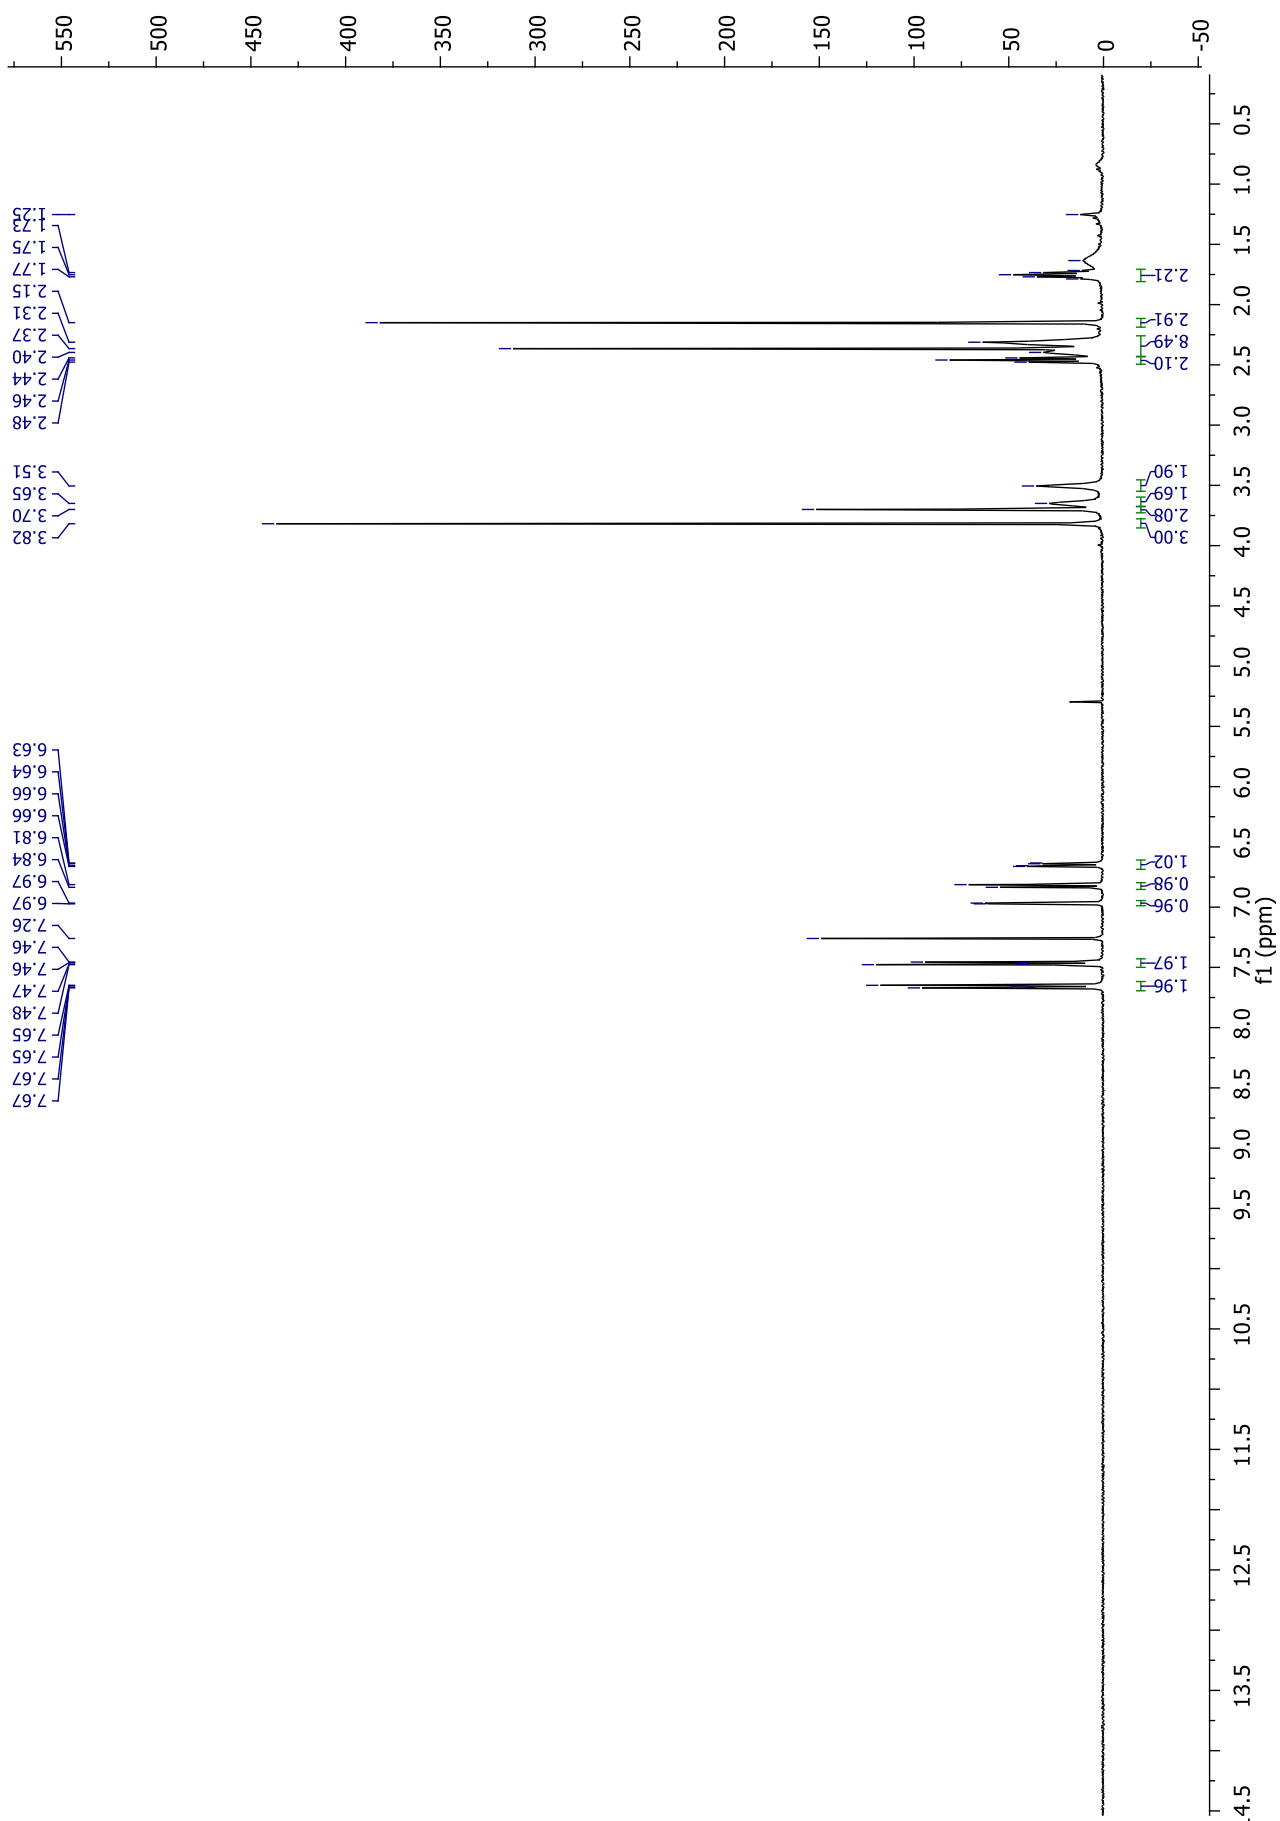

$^1\text{H}$  NMR (101 MHz,  $\text{CDCl}_3$ ) spectrum of compound **13**.

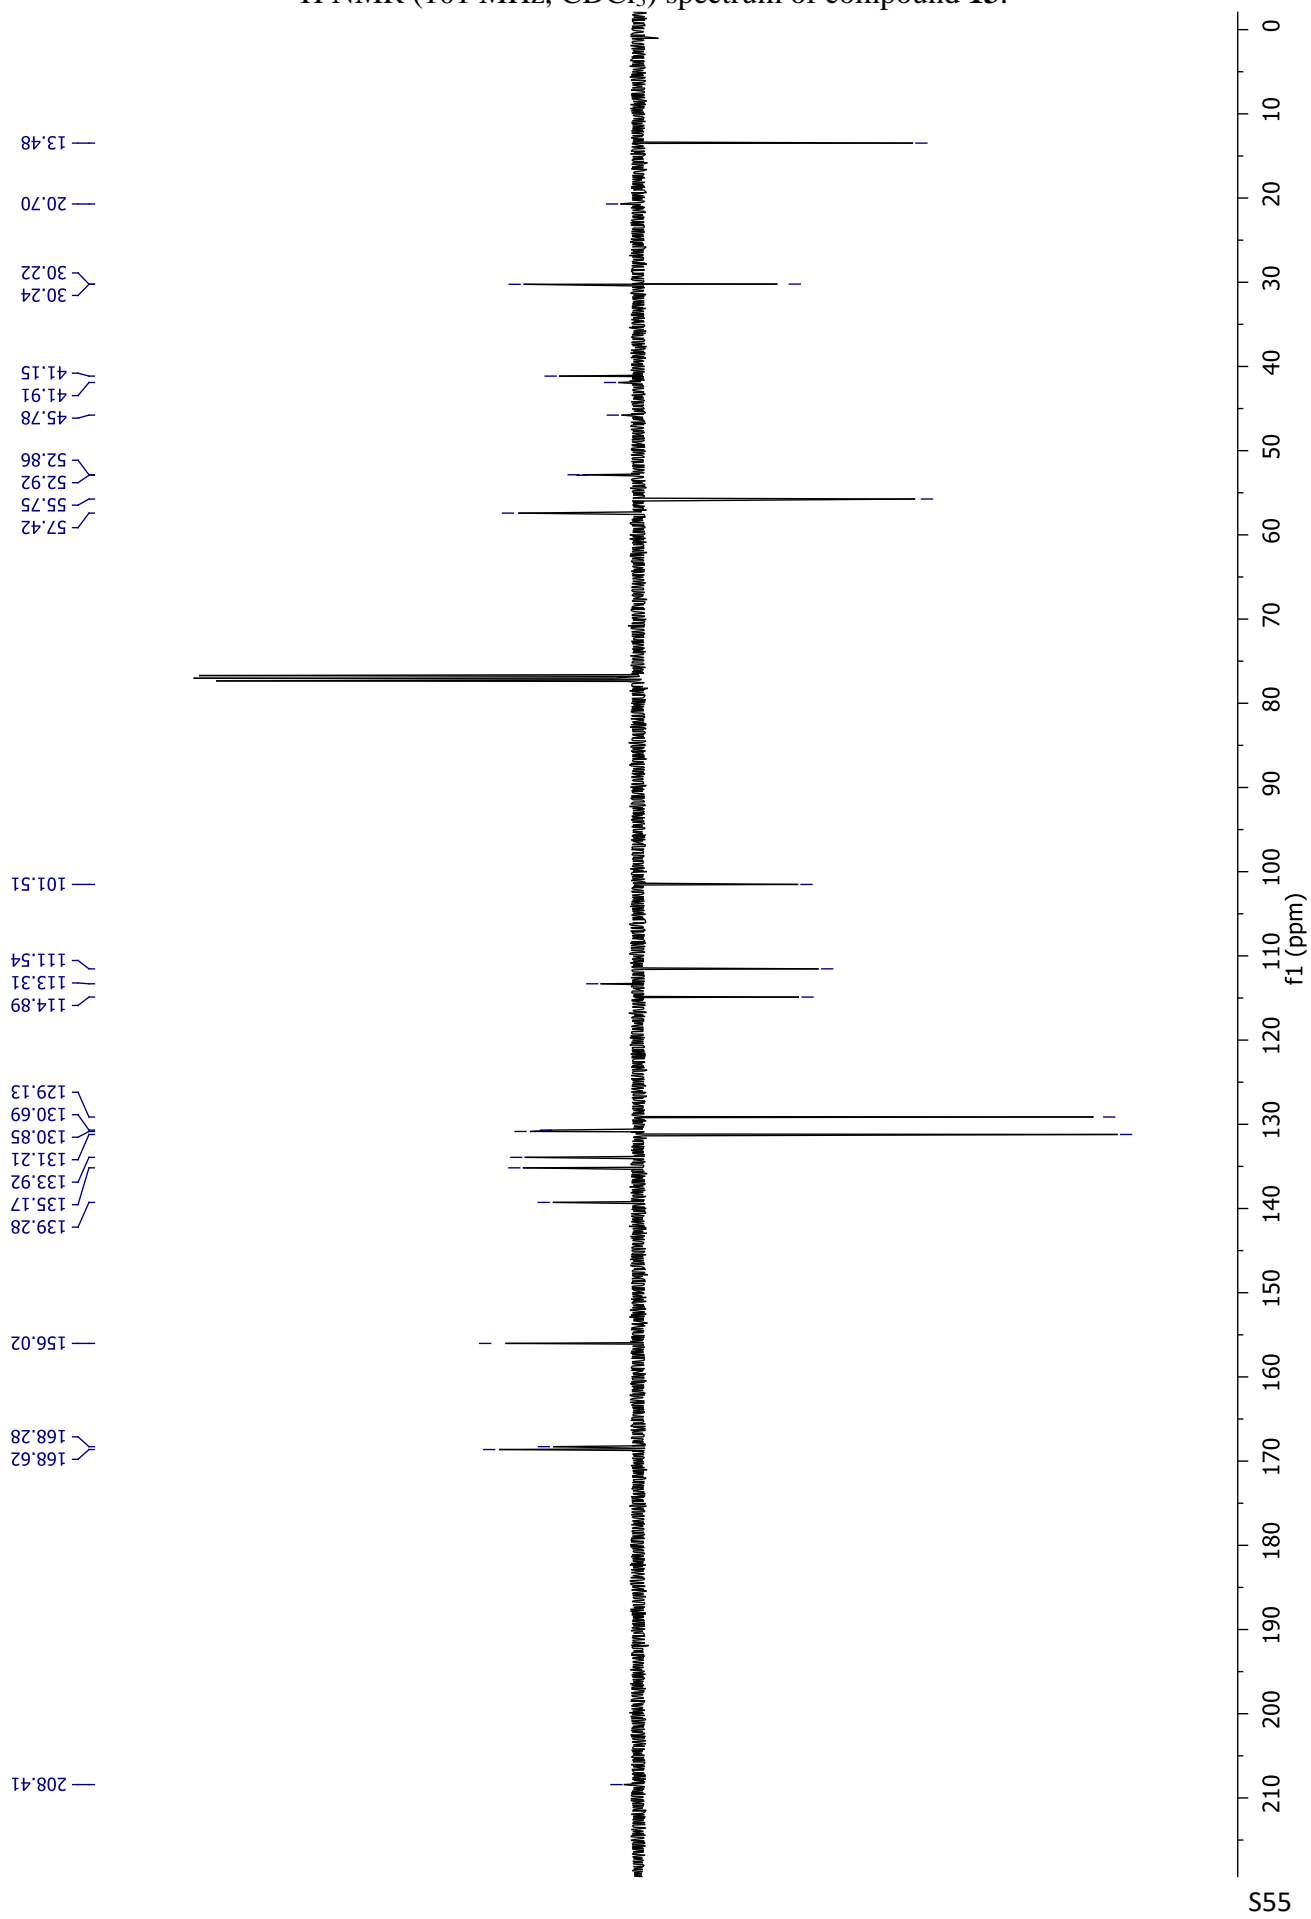

<sup>1</sup>H NMR (400 MHz, CDCl<sub>3</sub>) spectrum of compound **14**.

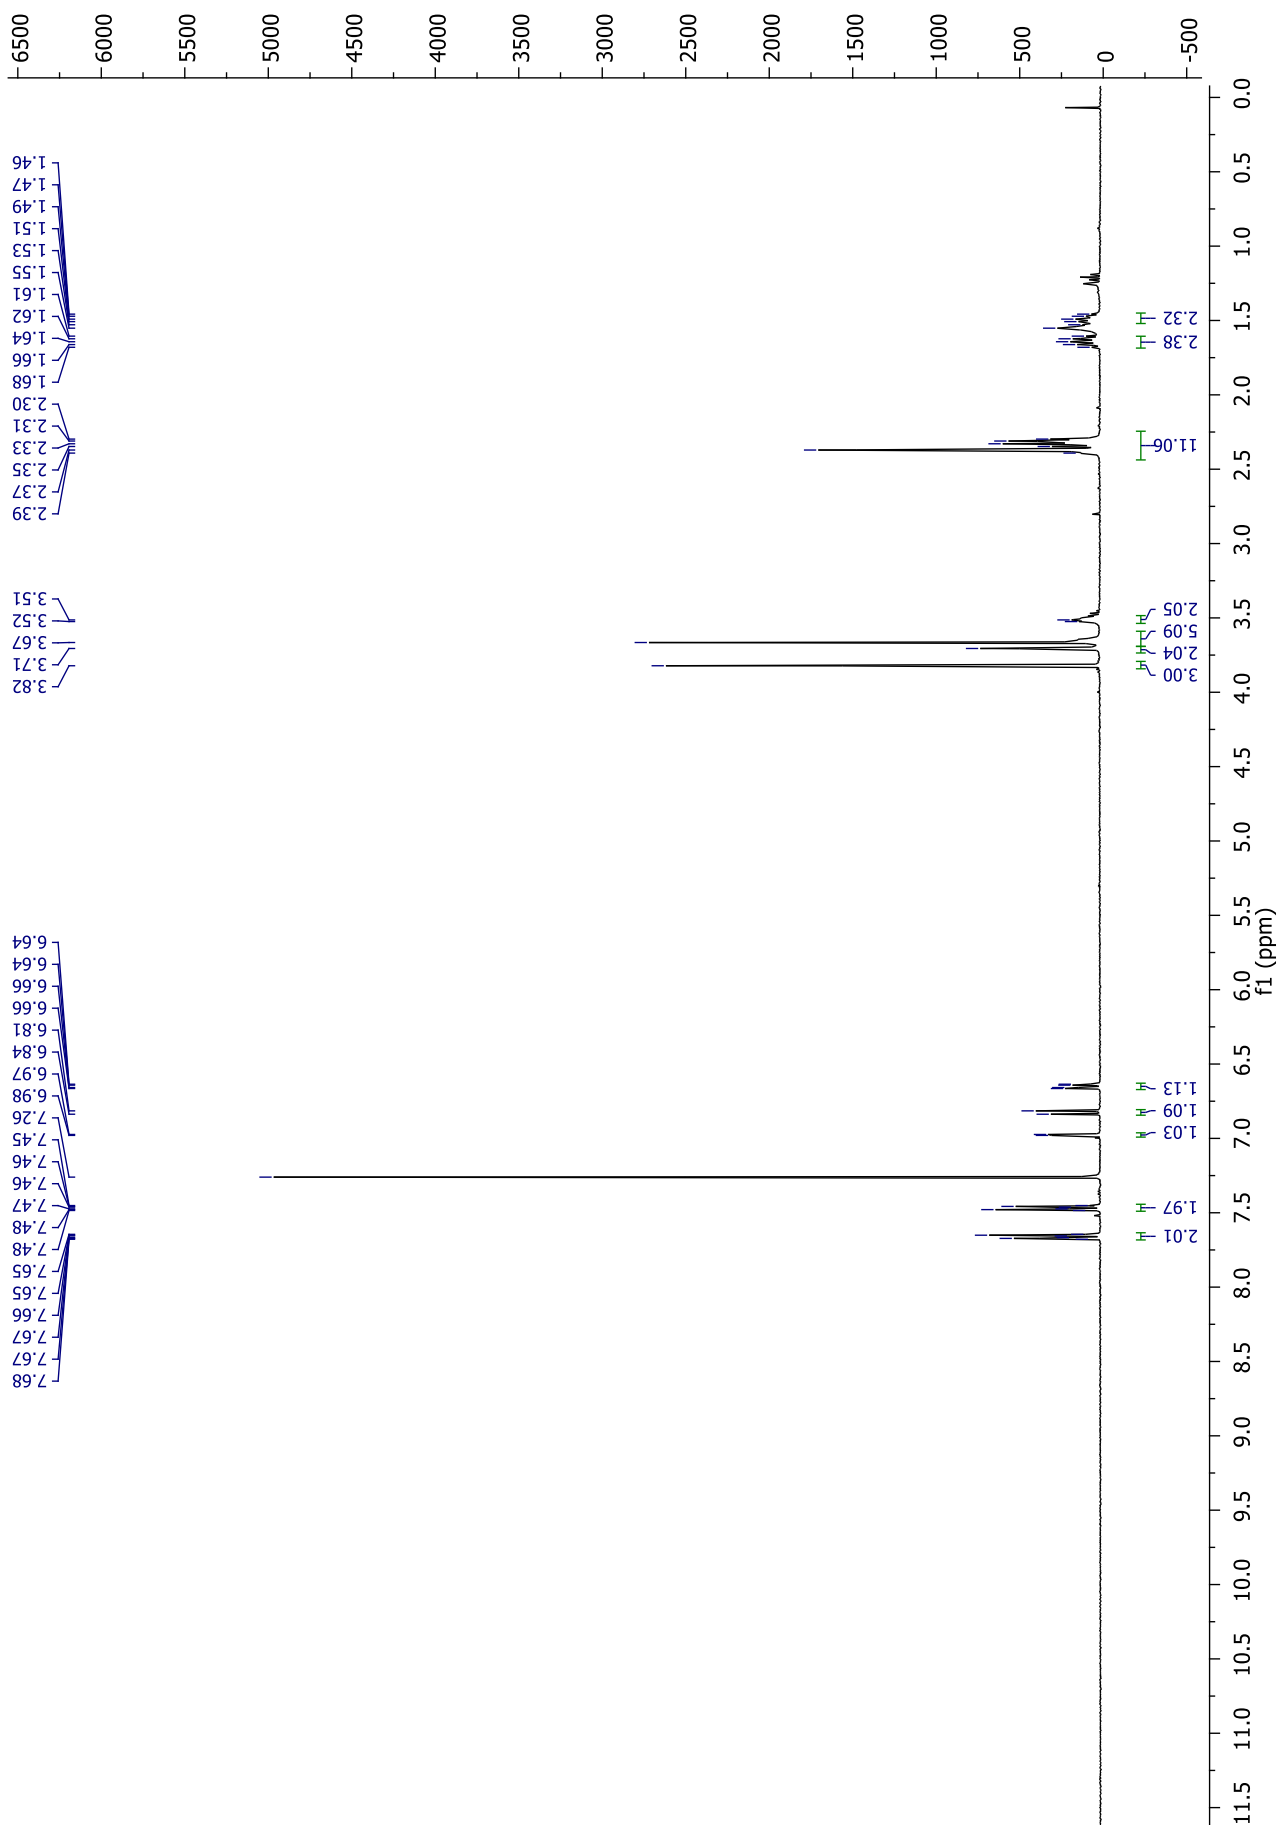



$^{13}\text{C}$  NMR (101 MHz,  $\text{CDCl}_3$ ) spectrum of compound **14**.

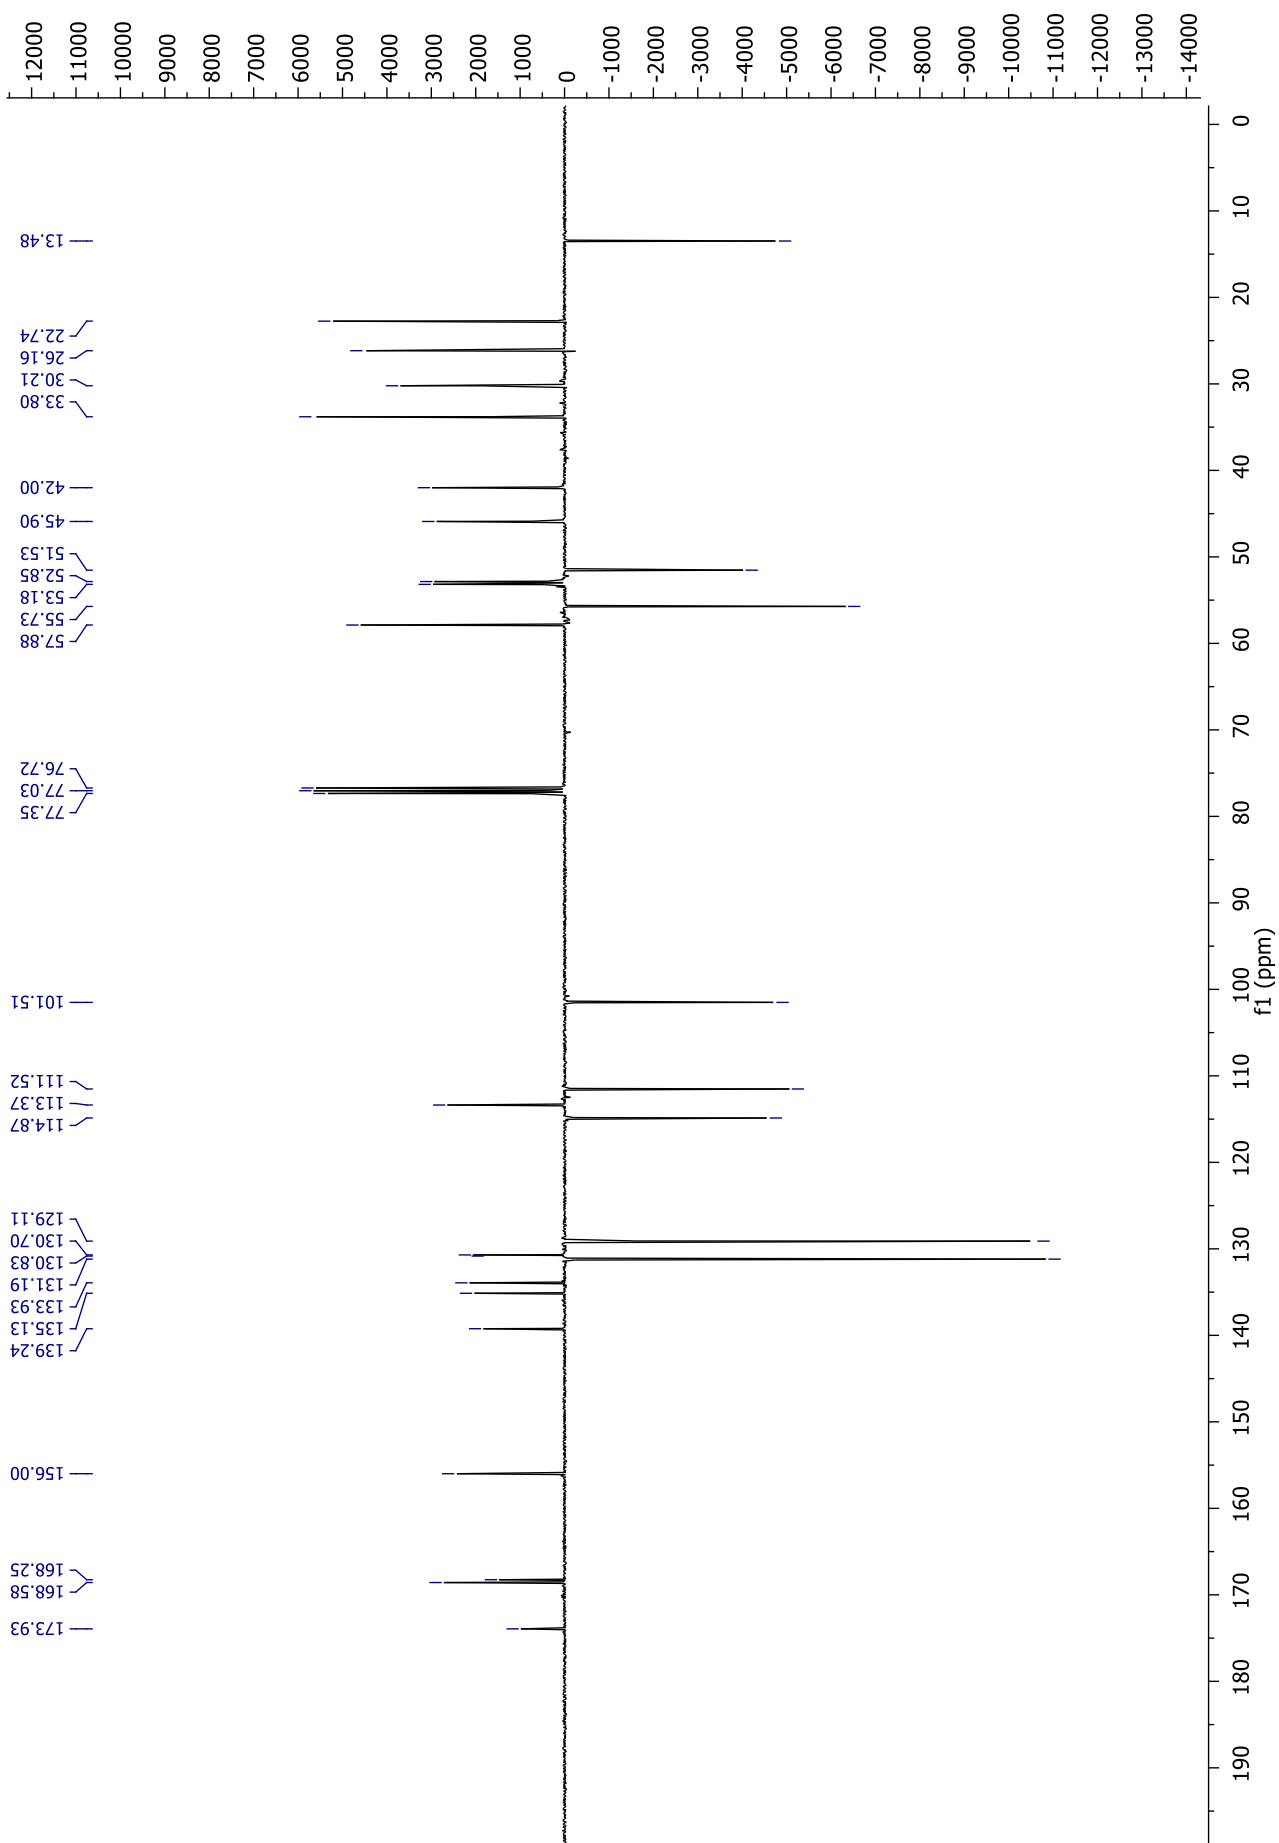

$^1\text{H}$  NMR (400 MHz,  $\text{CDCl}_3$ ) spectrum of compound **15**.

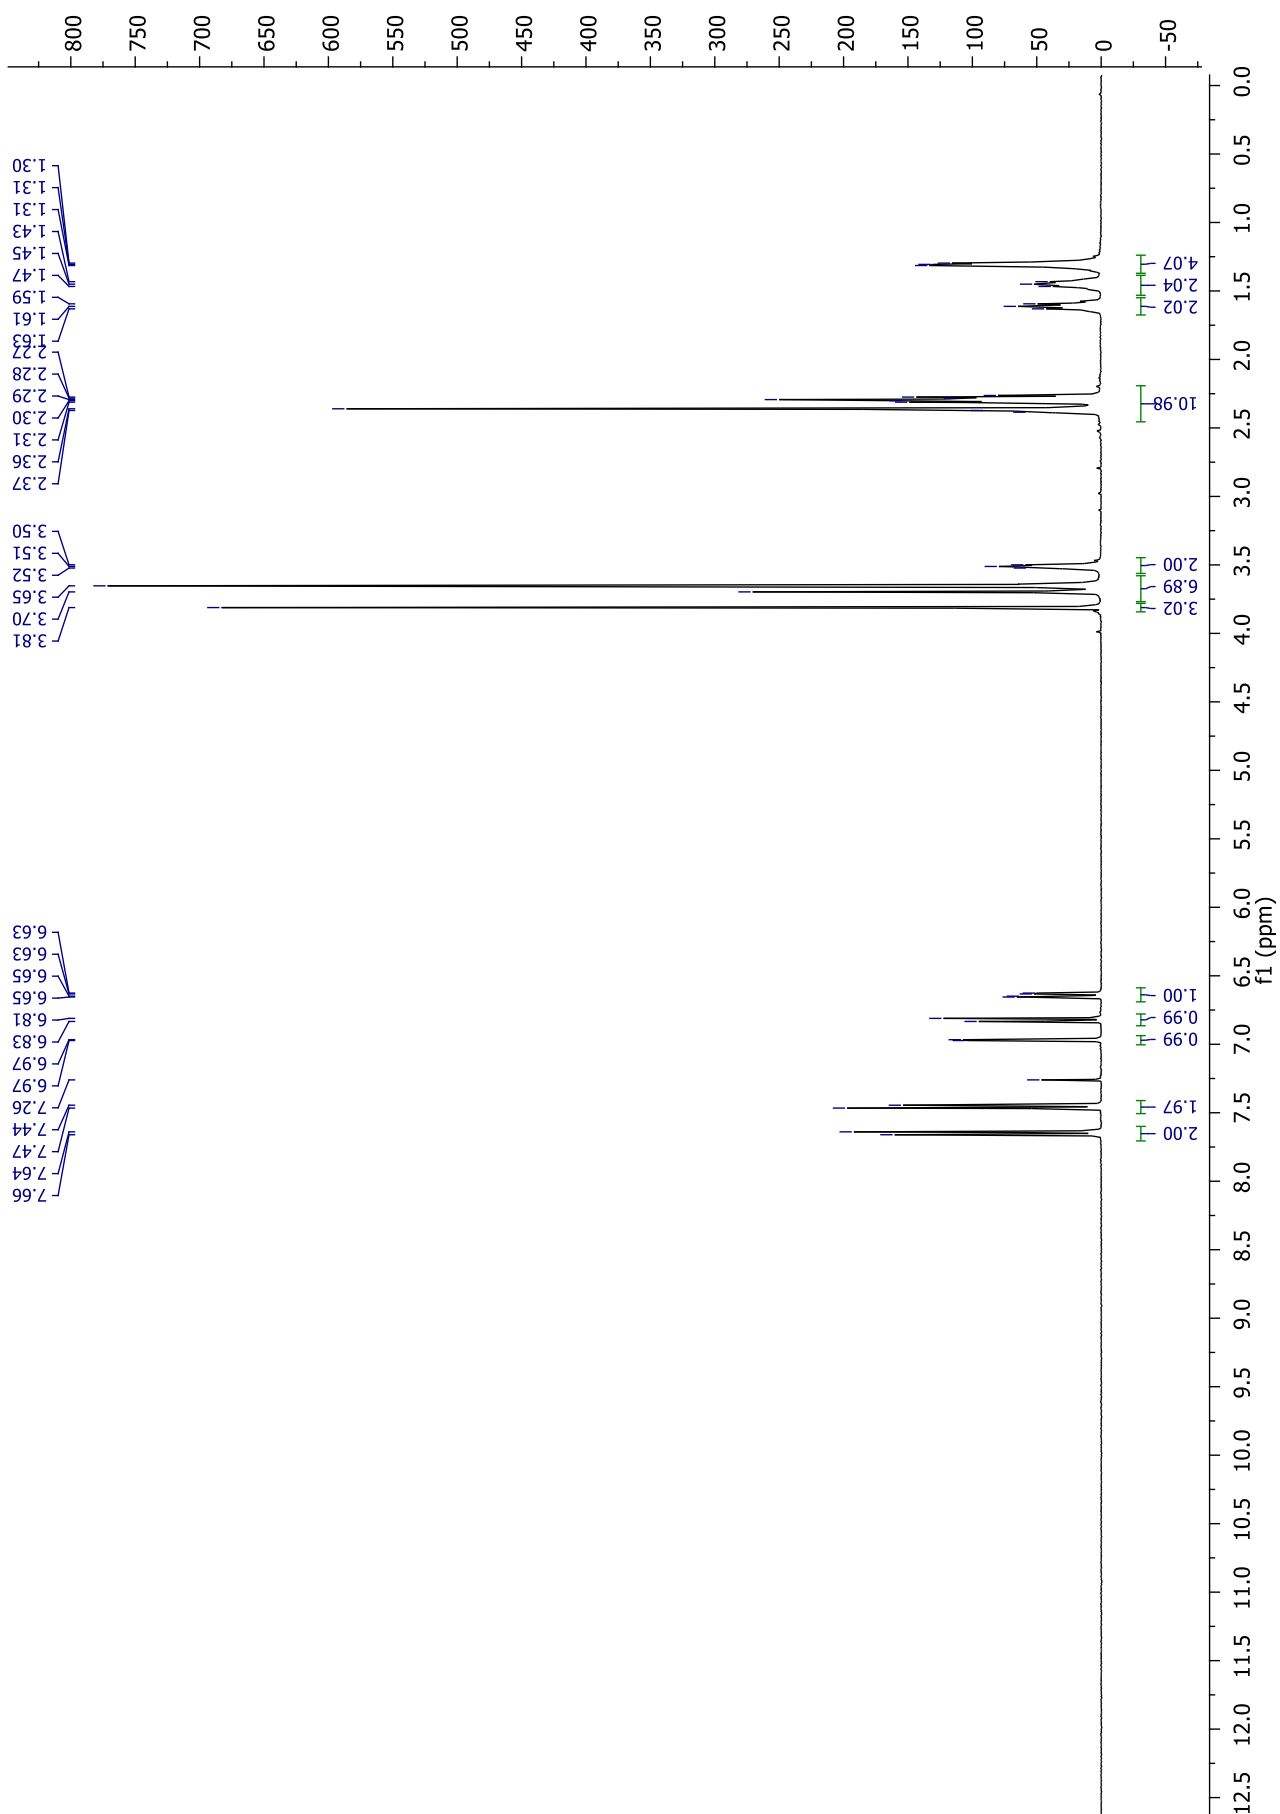

$^1\text{H}$  NMR (400 MHz,  $\text{CDCl}_3$ ) spectrum of compound **15**.

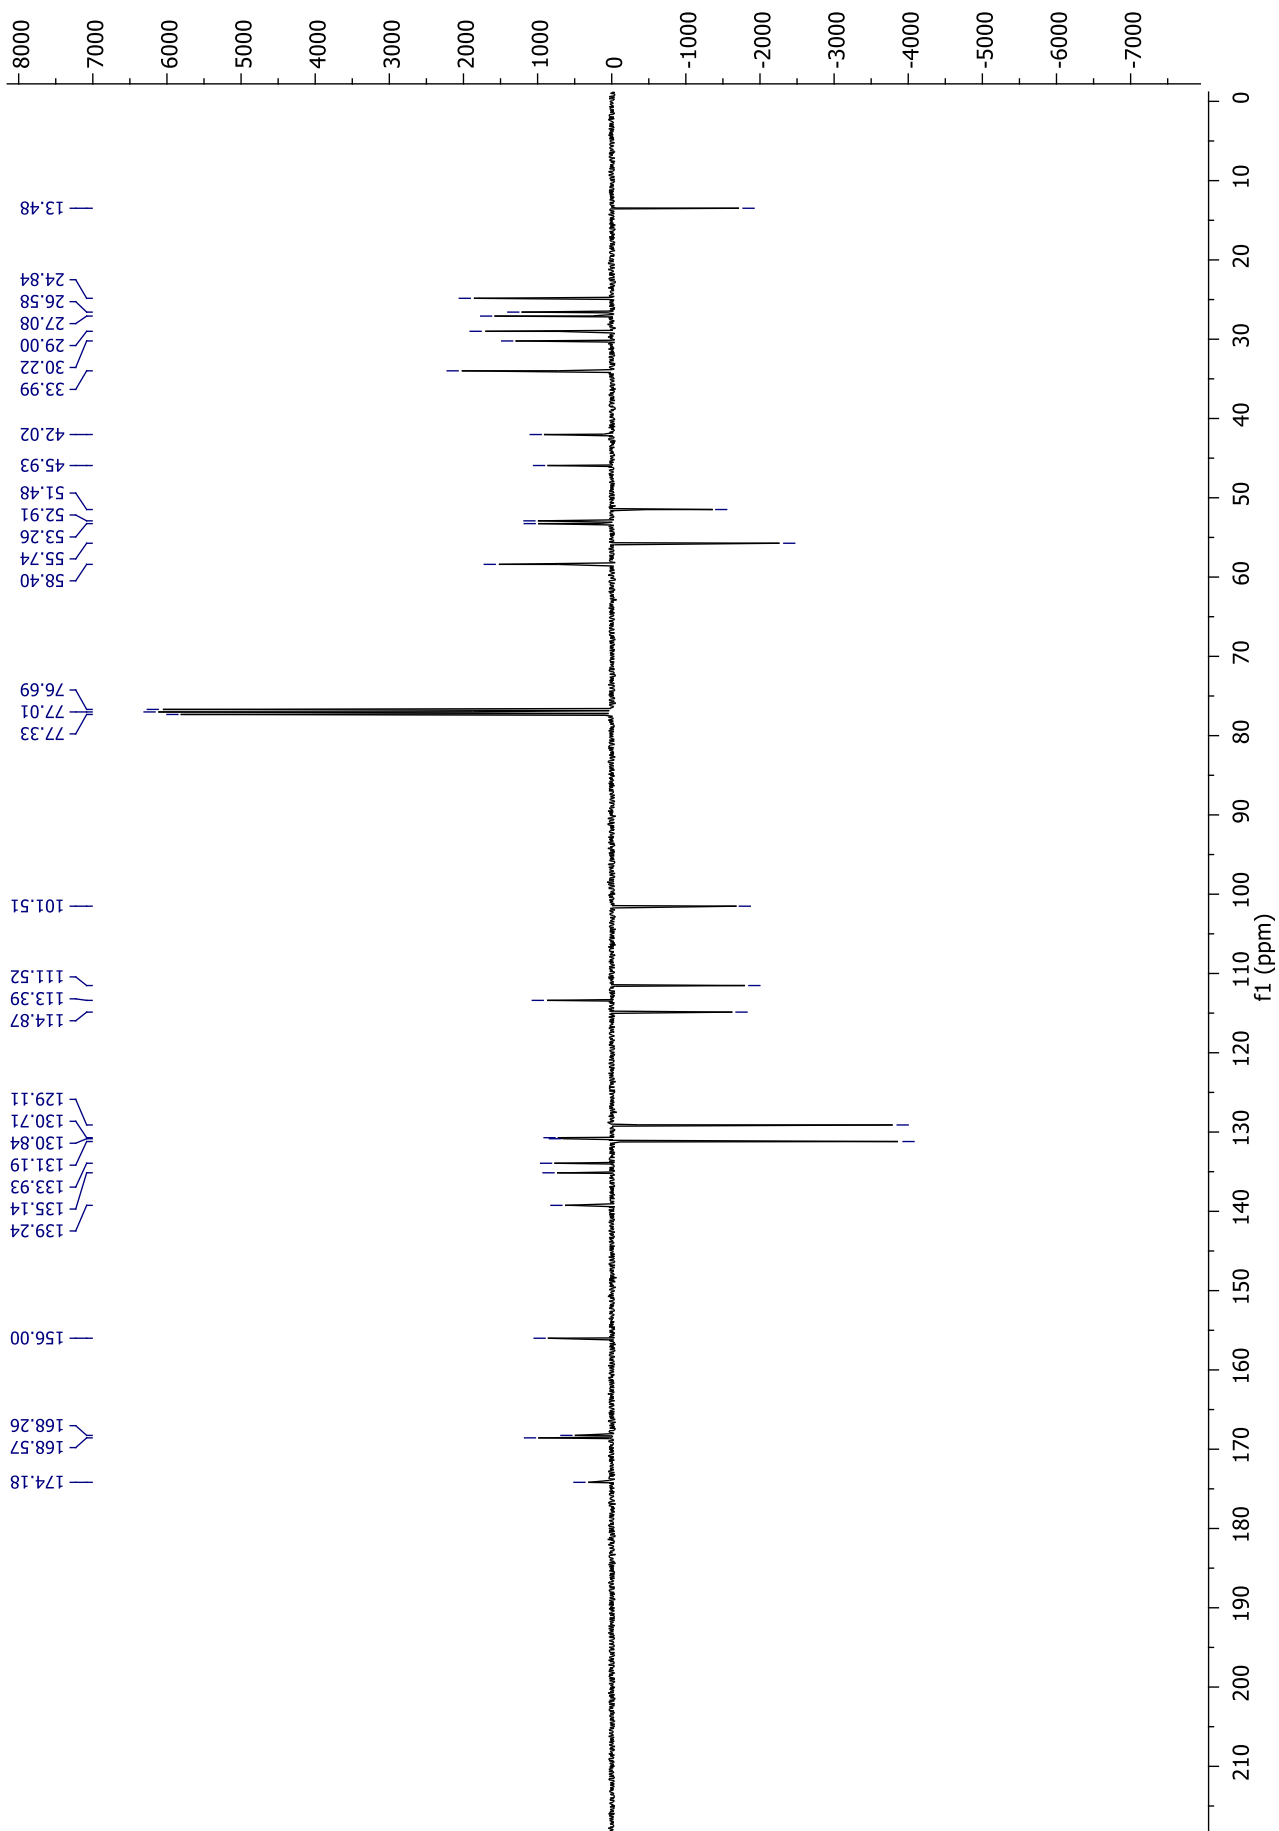

$^1\text{H}$  NMR (400 MHz,  $\text{CDCl}_3$ ) spectrum of compound **16**.

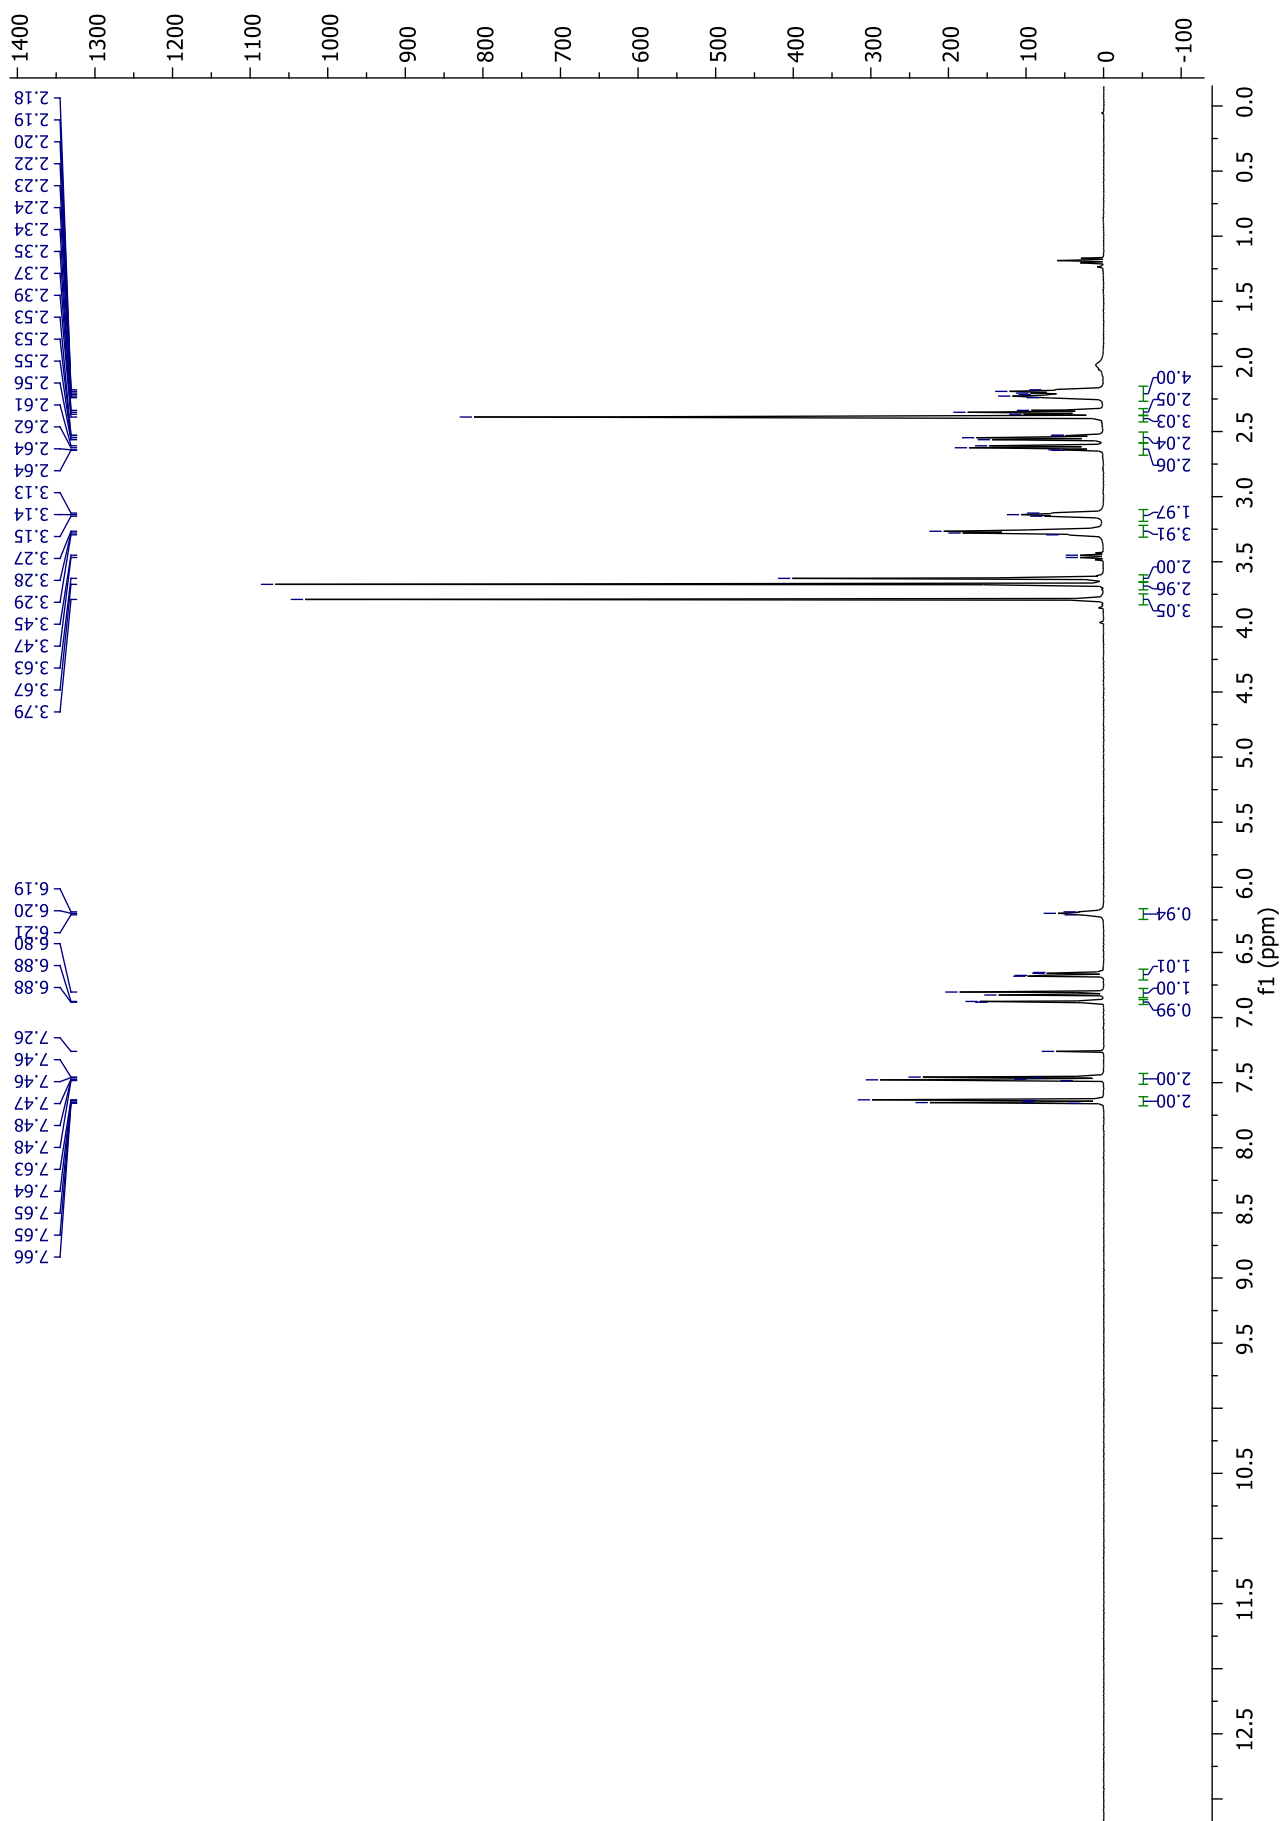

$^{13}\text{C}$  NMR (101 MHz,  $\text{CDCl}_3$ ) spectrum of compound **16**.

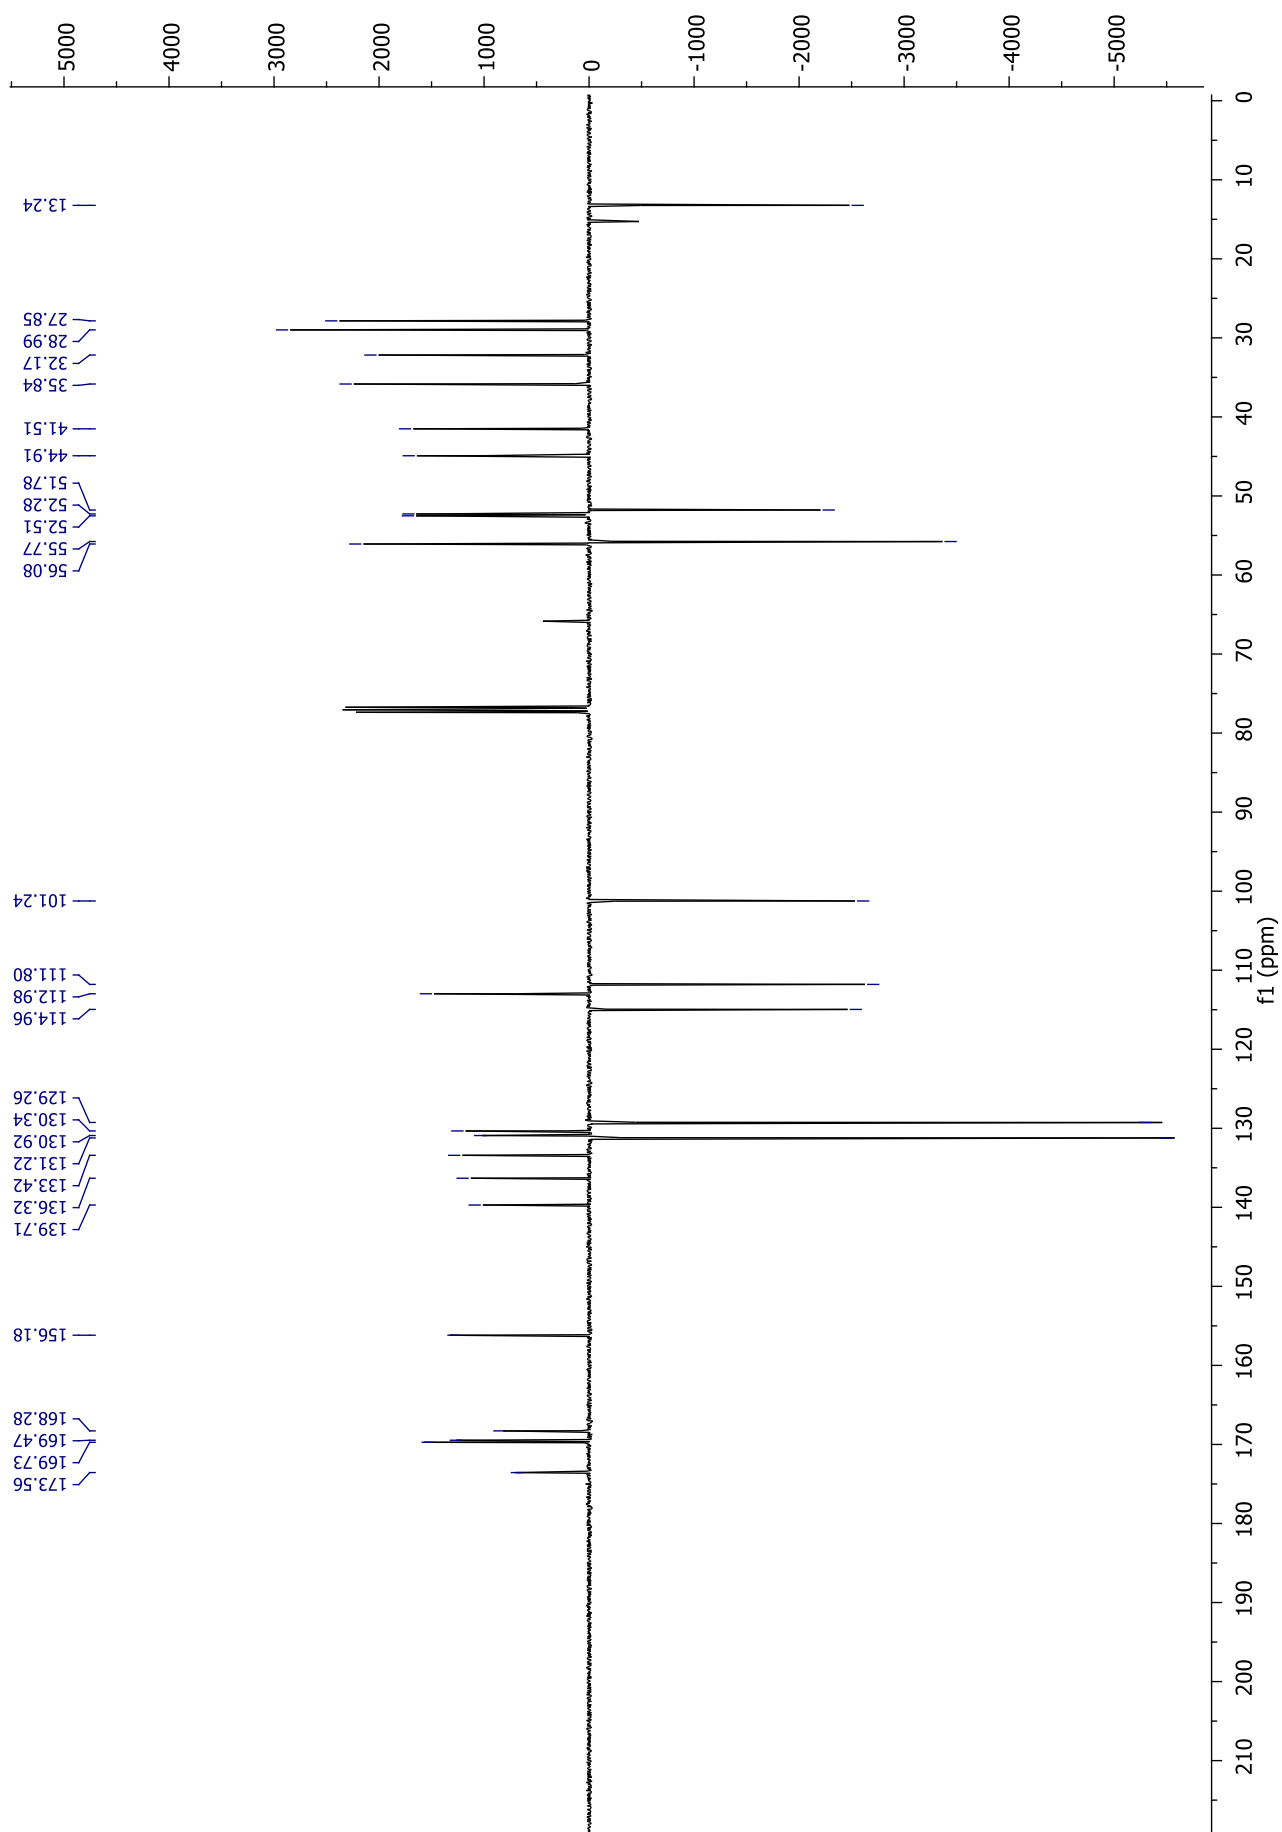

$^1\text{H}$  NMR (400 MHz,  $\text{CDCl}_3$ ) spectrum of compound **17**.

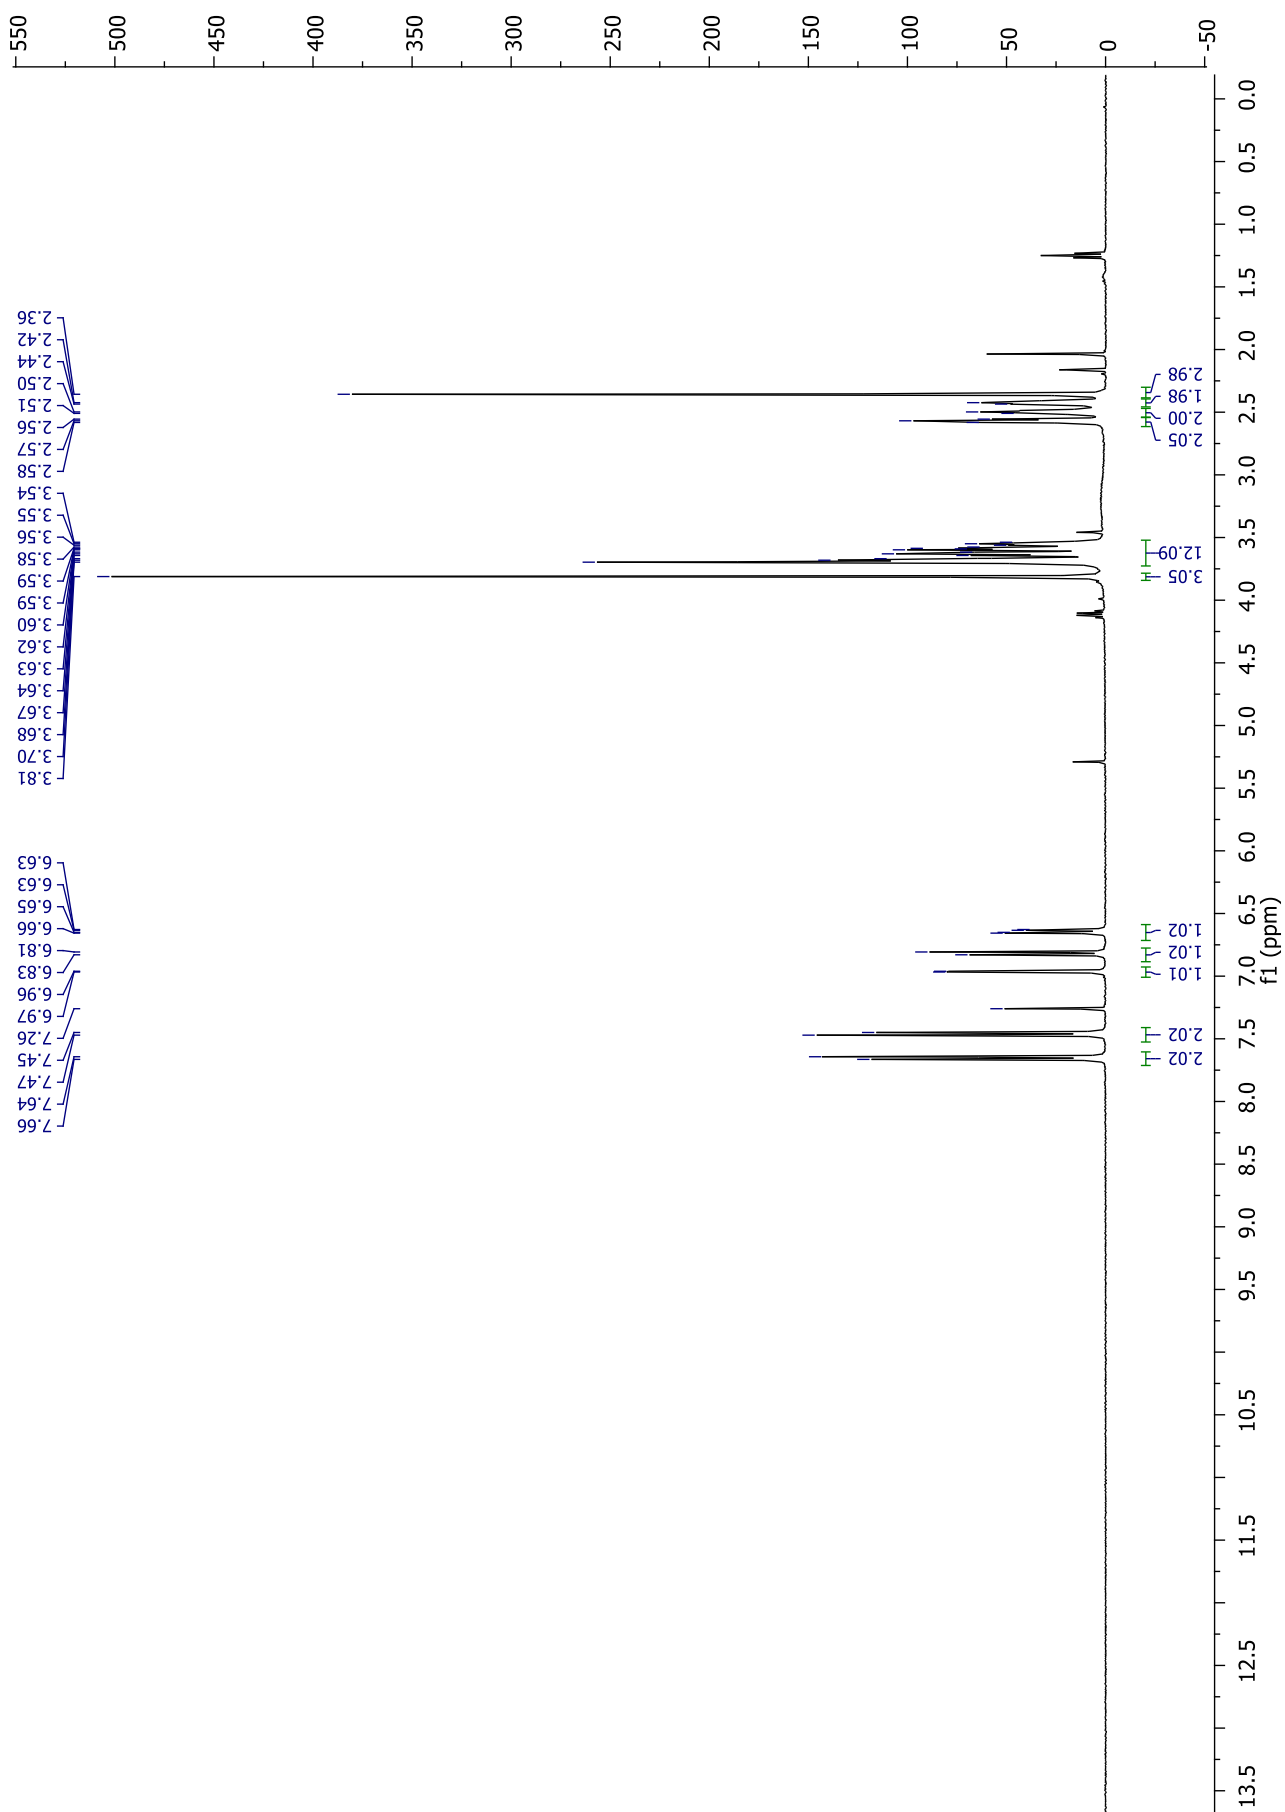

$^1\text{H}$  NMR (400 MHz,  $\text{CDCl}_3$ ) spectrum of compound **17**.

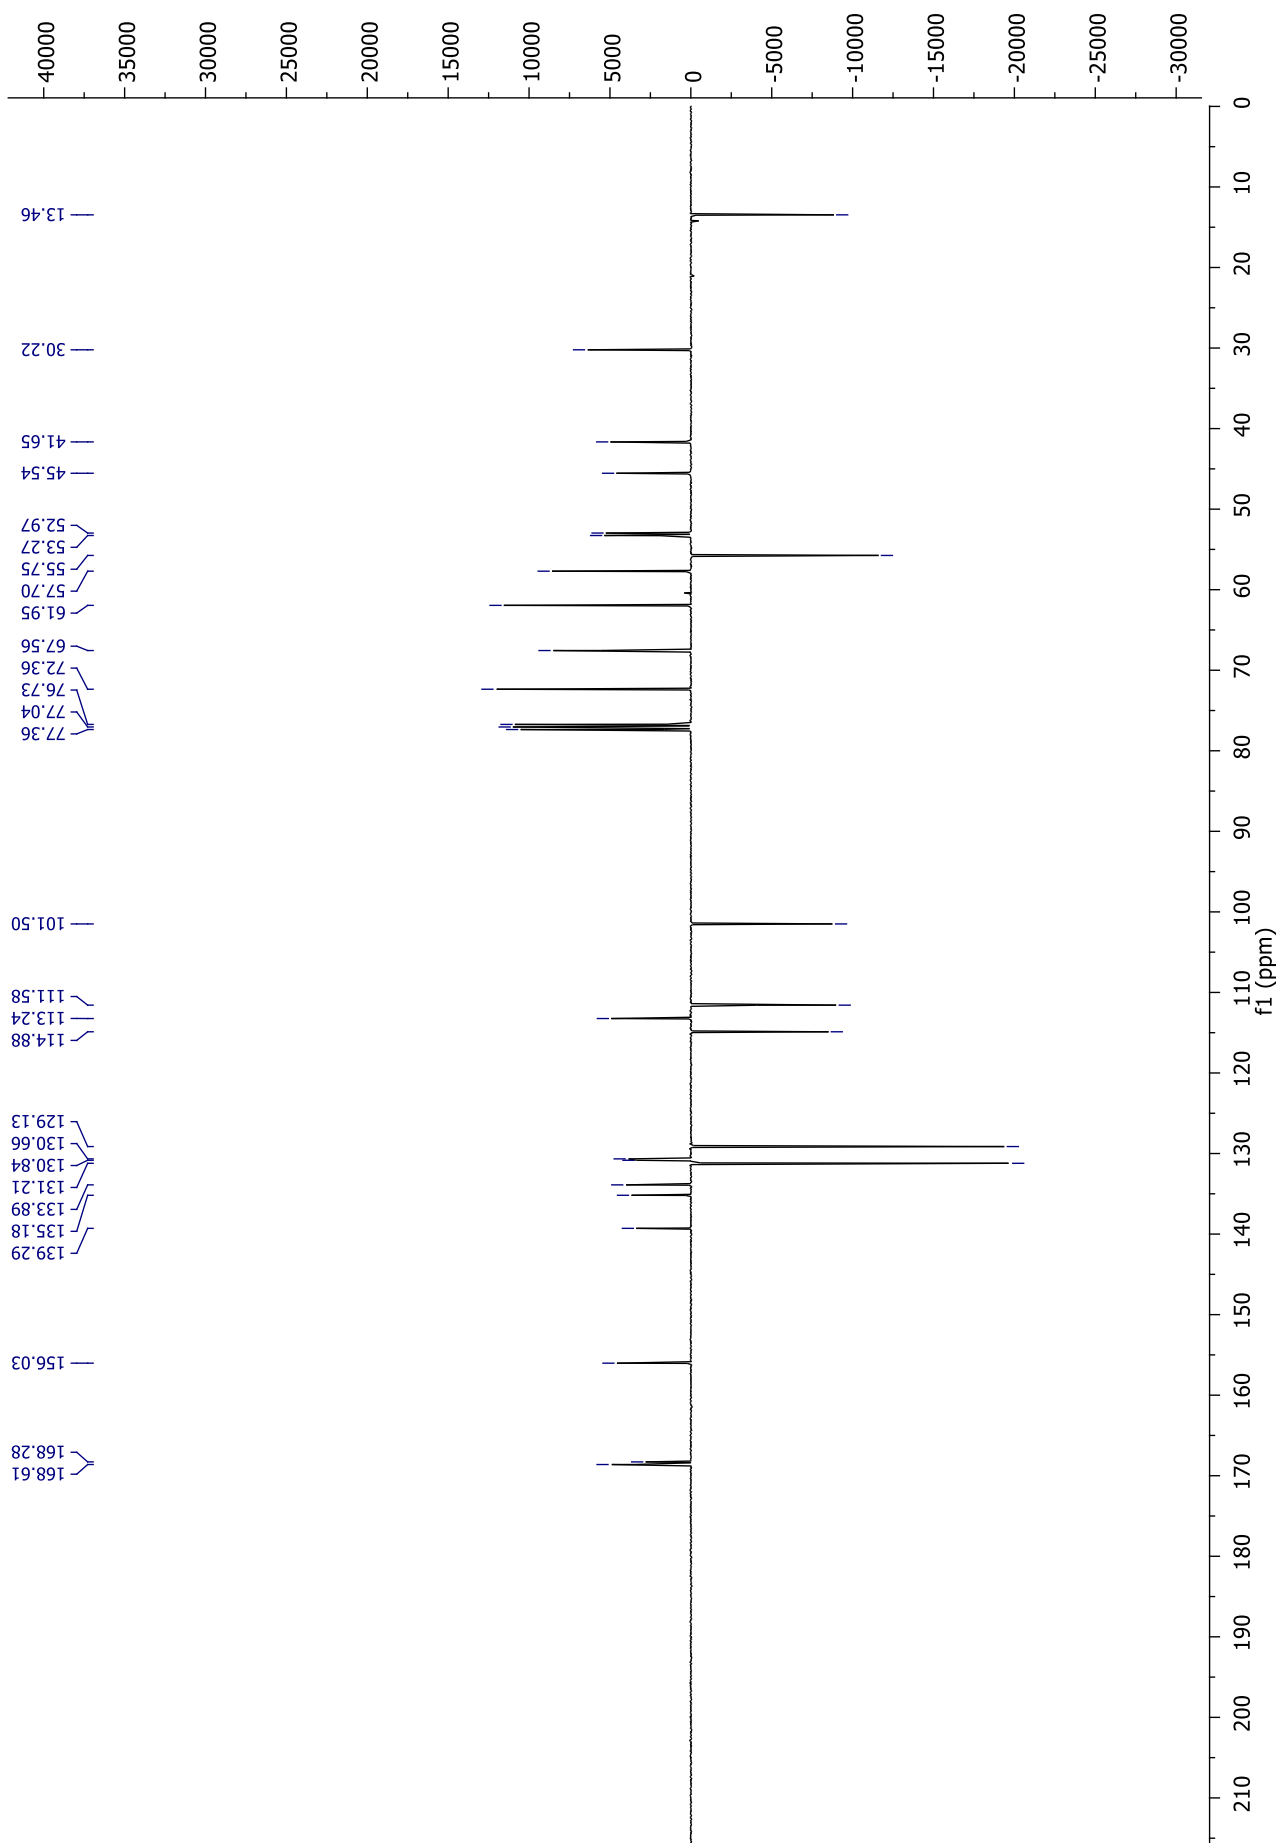

$^1\text{H}$  NMR (400 MHz,  $\text{DMSO-}d_6$ ) spectrum of **PROTAC-1**.

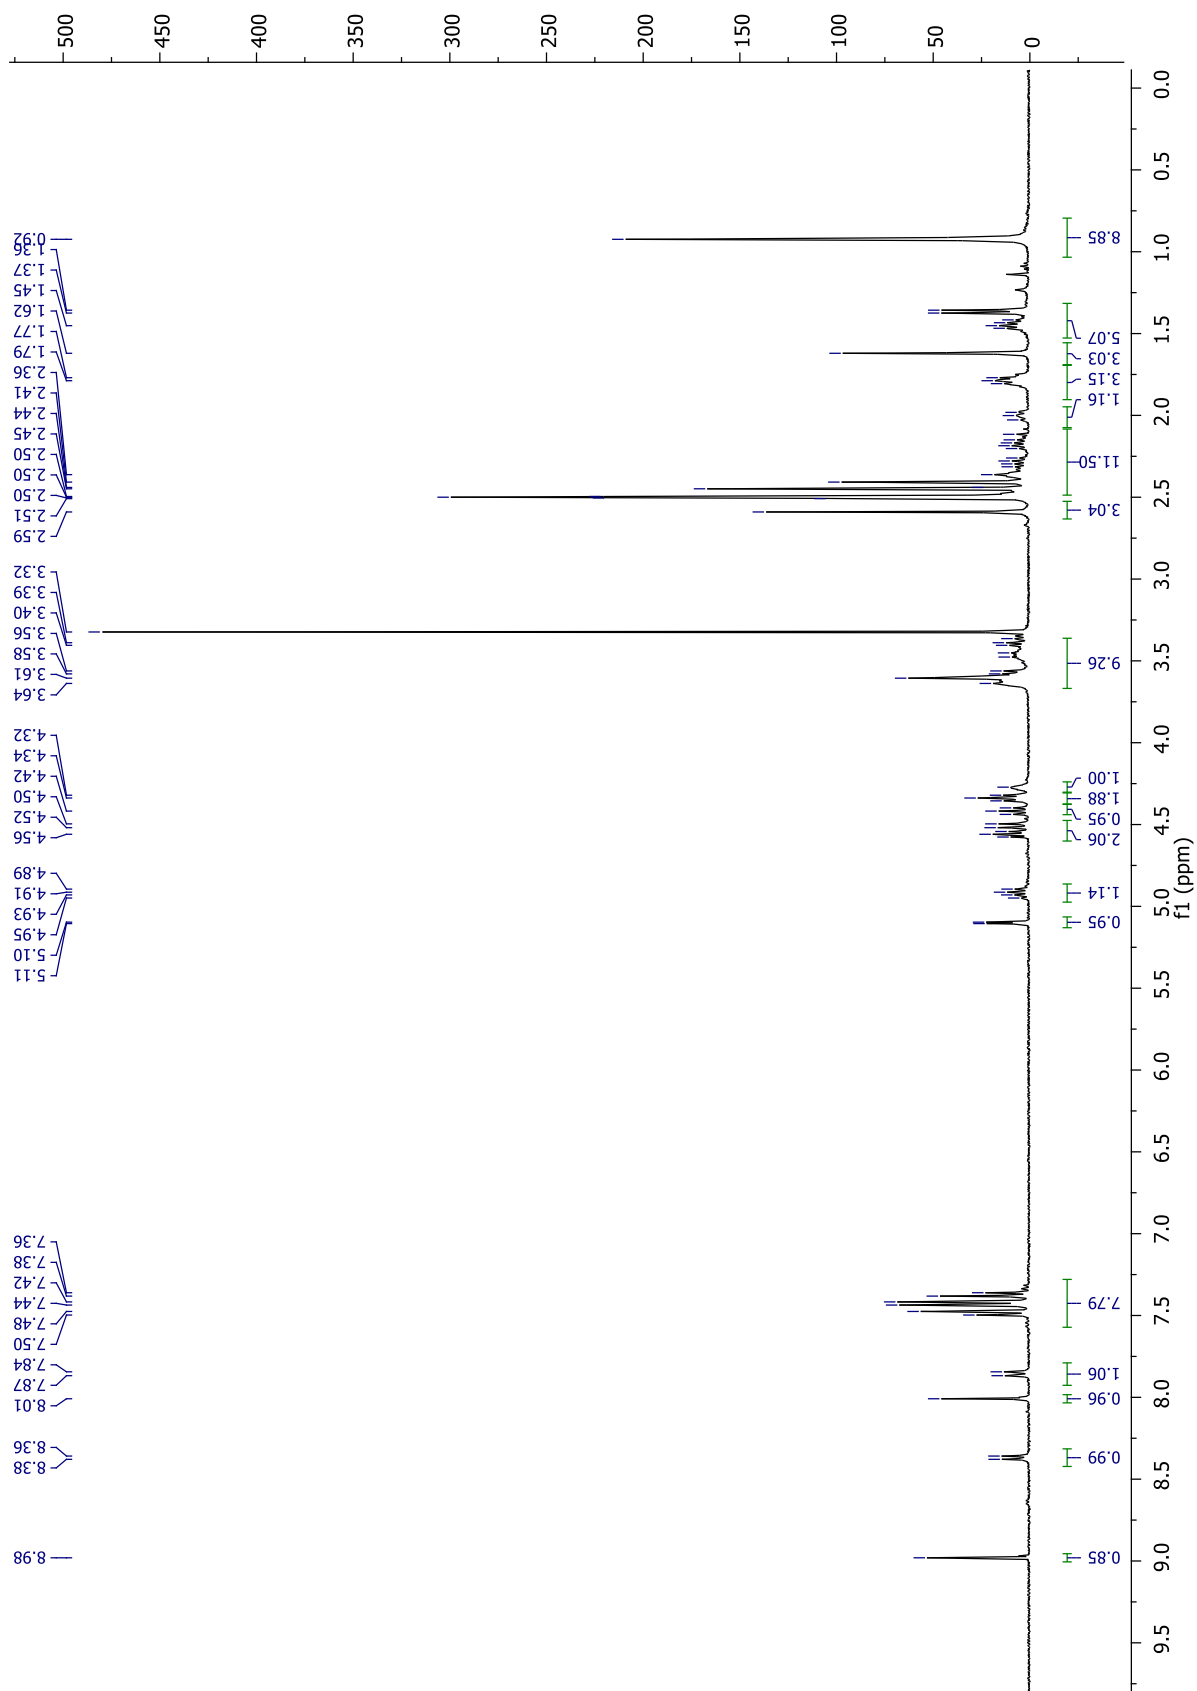



$^{13}\text{C}$  NMR (101 MHz,  $\text{DMSO-}d_6$ ) spectrum of **PROTAC-1**.

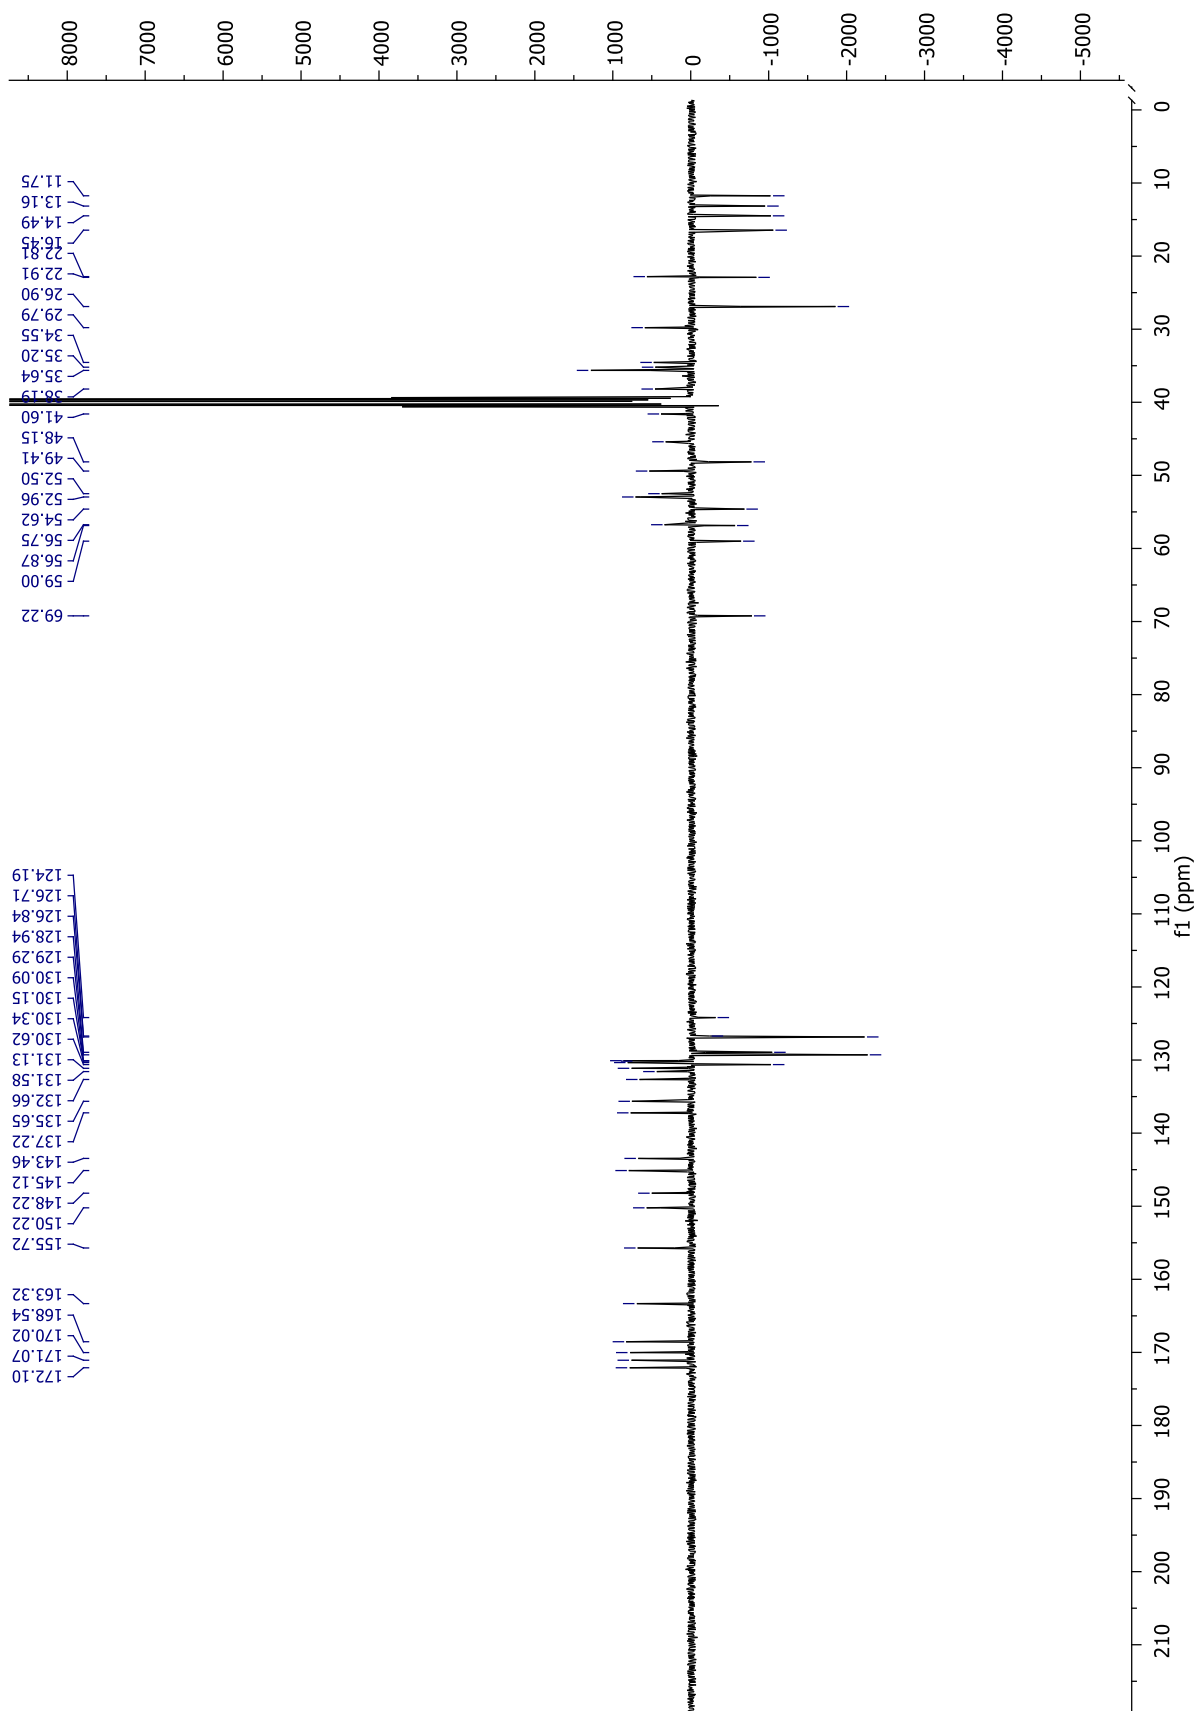



$^{13}\text{C}$  NMR (101 MHz,  $\text{DMSO-}d_6$ ) spectrum of **PROTAC-3**.

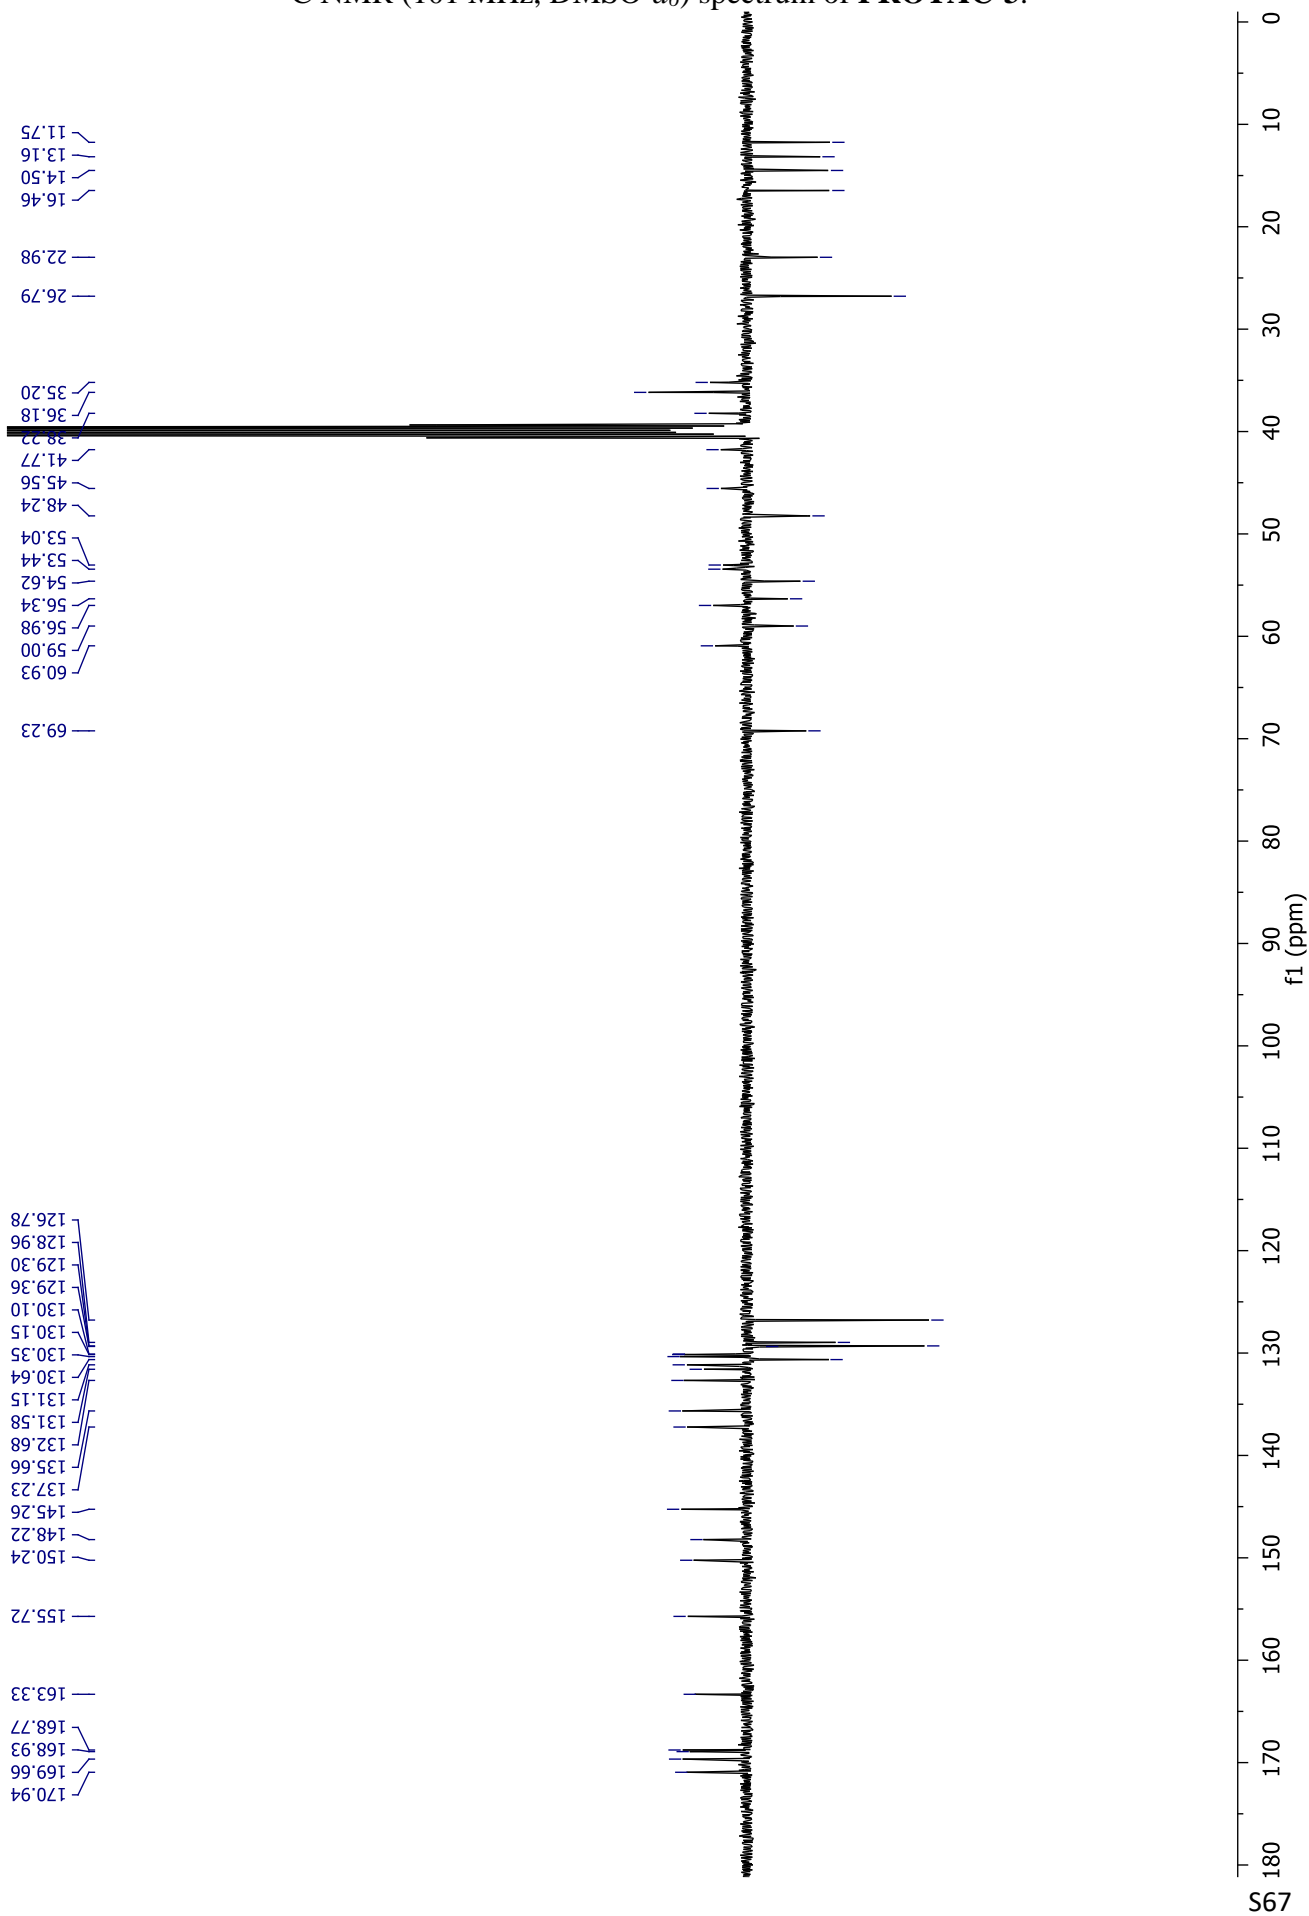

<sup>1</sup>H NMR (400 MHz, CDCl<sub>3</sub>) spectrum of **PROTAC-4**.

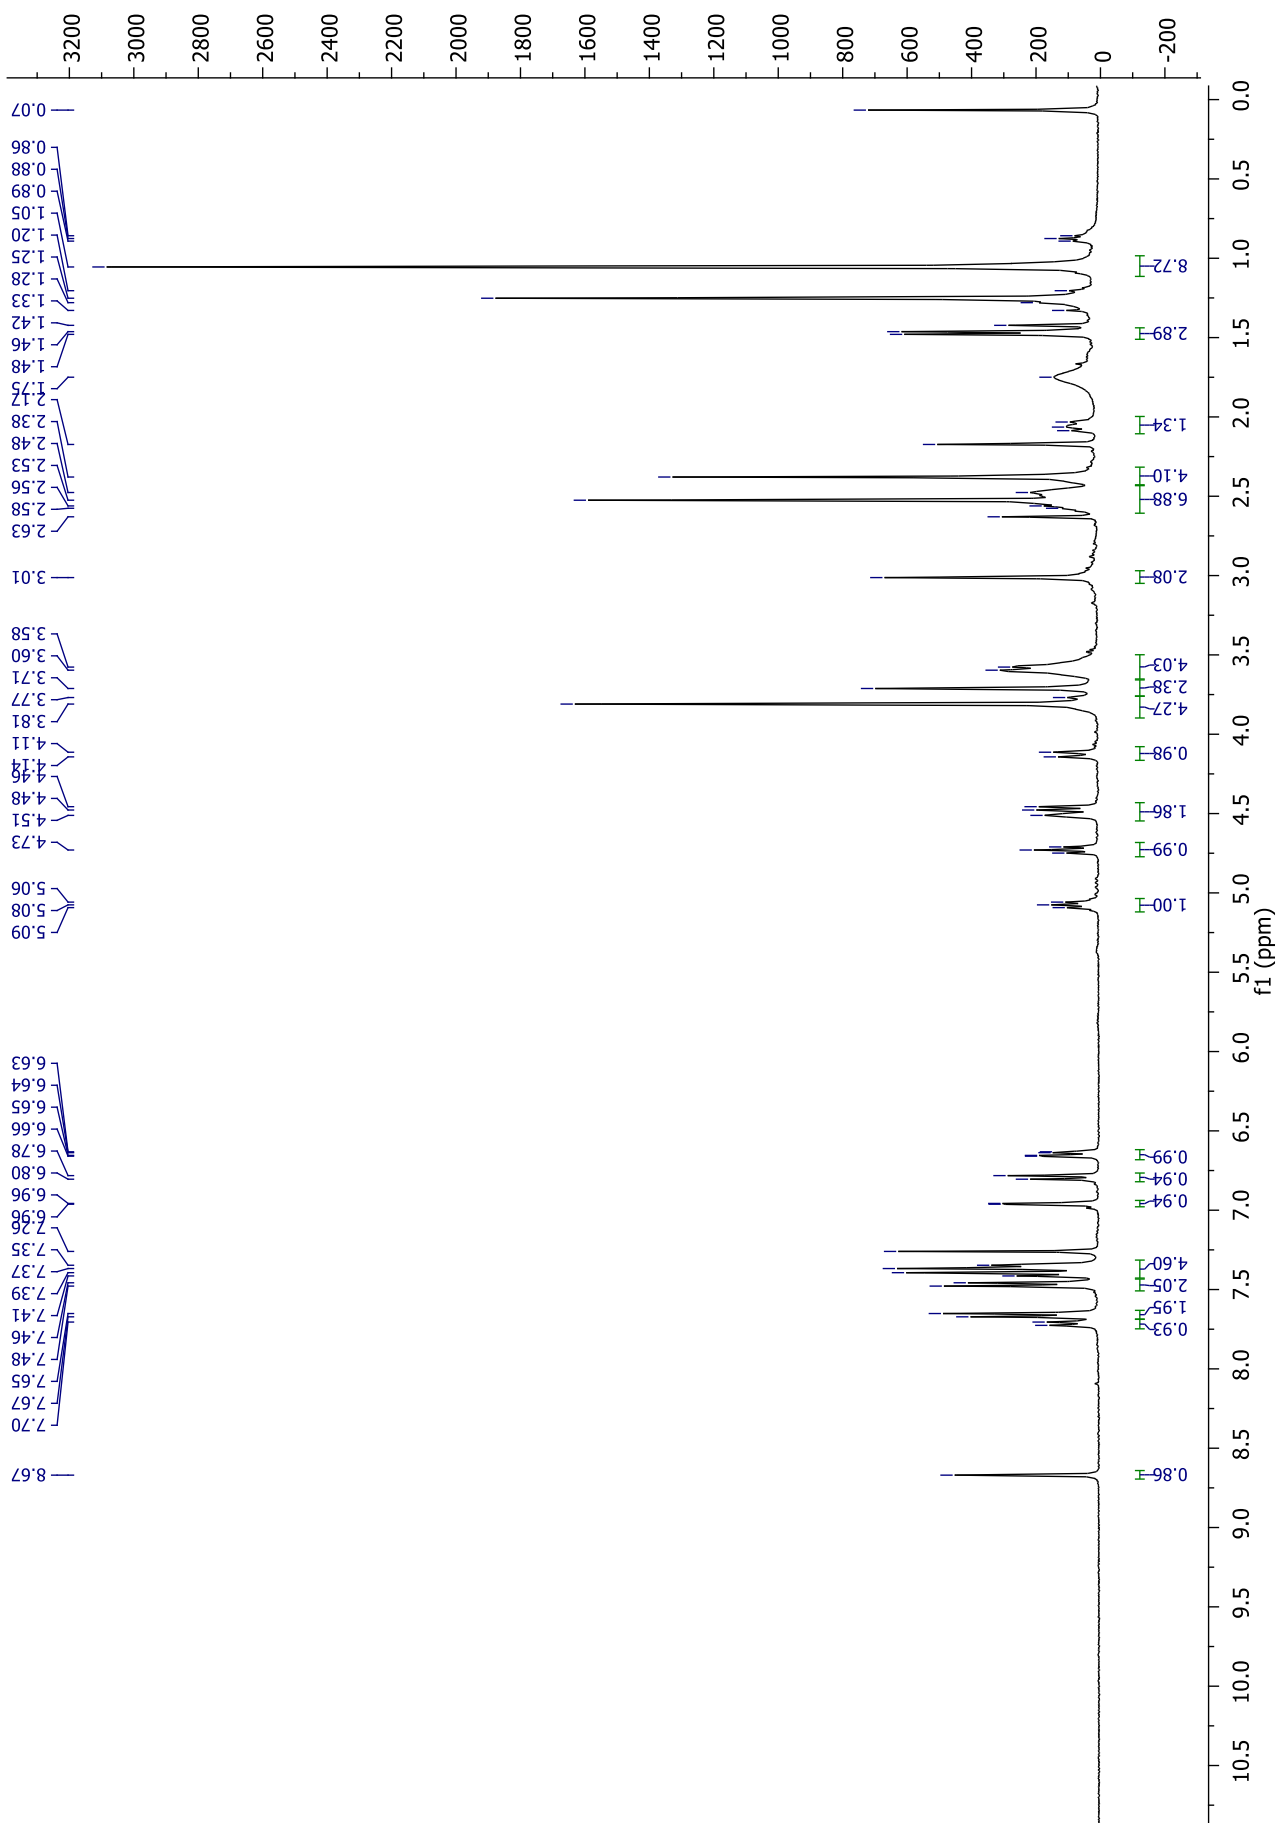

<sup>13</sup>C NMR (101 MHz, CDCl<sub>3</sub>) spectrum of **PROTAC-4**.

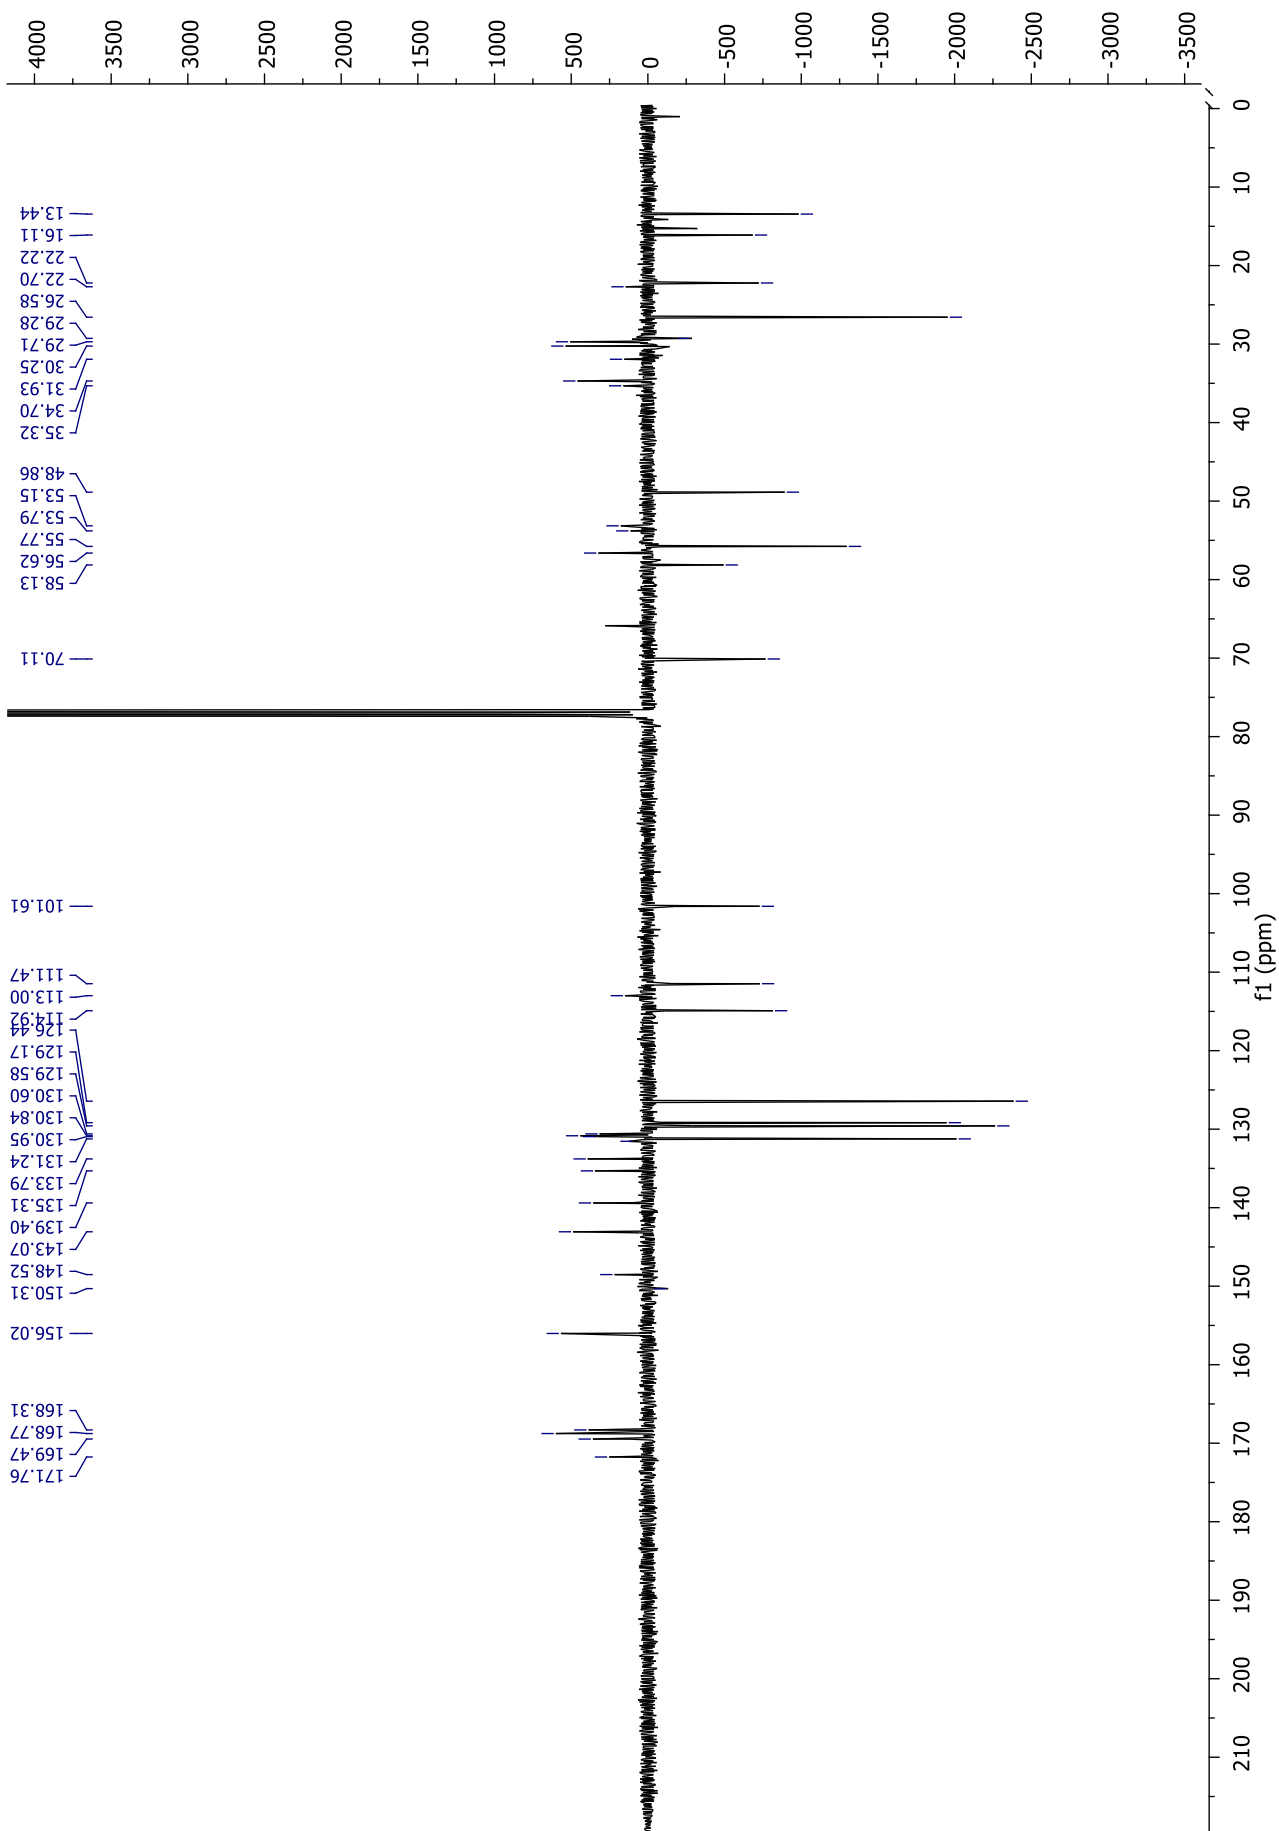

<sup>1</sup>H NMR (400 MHz, CDCl<sub>3</sub>) spectrum of **PROTAC-6**.

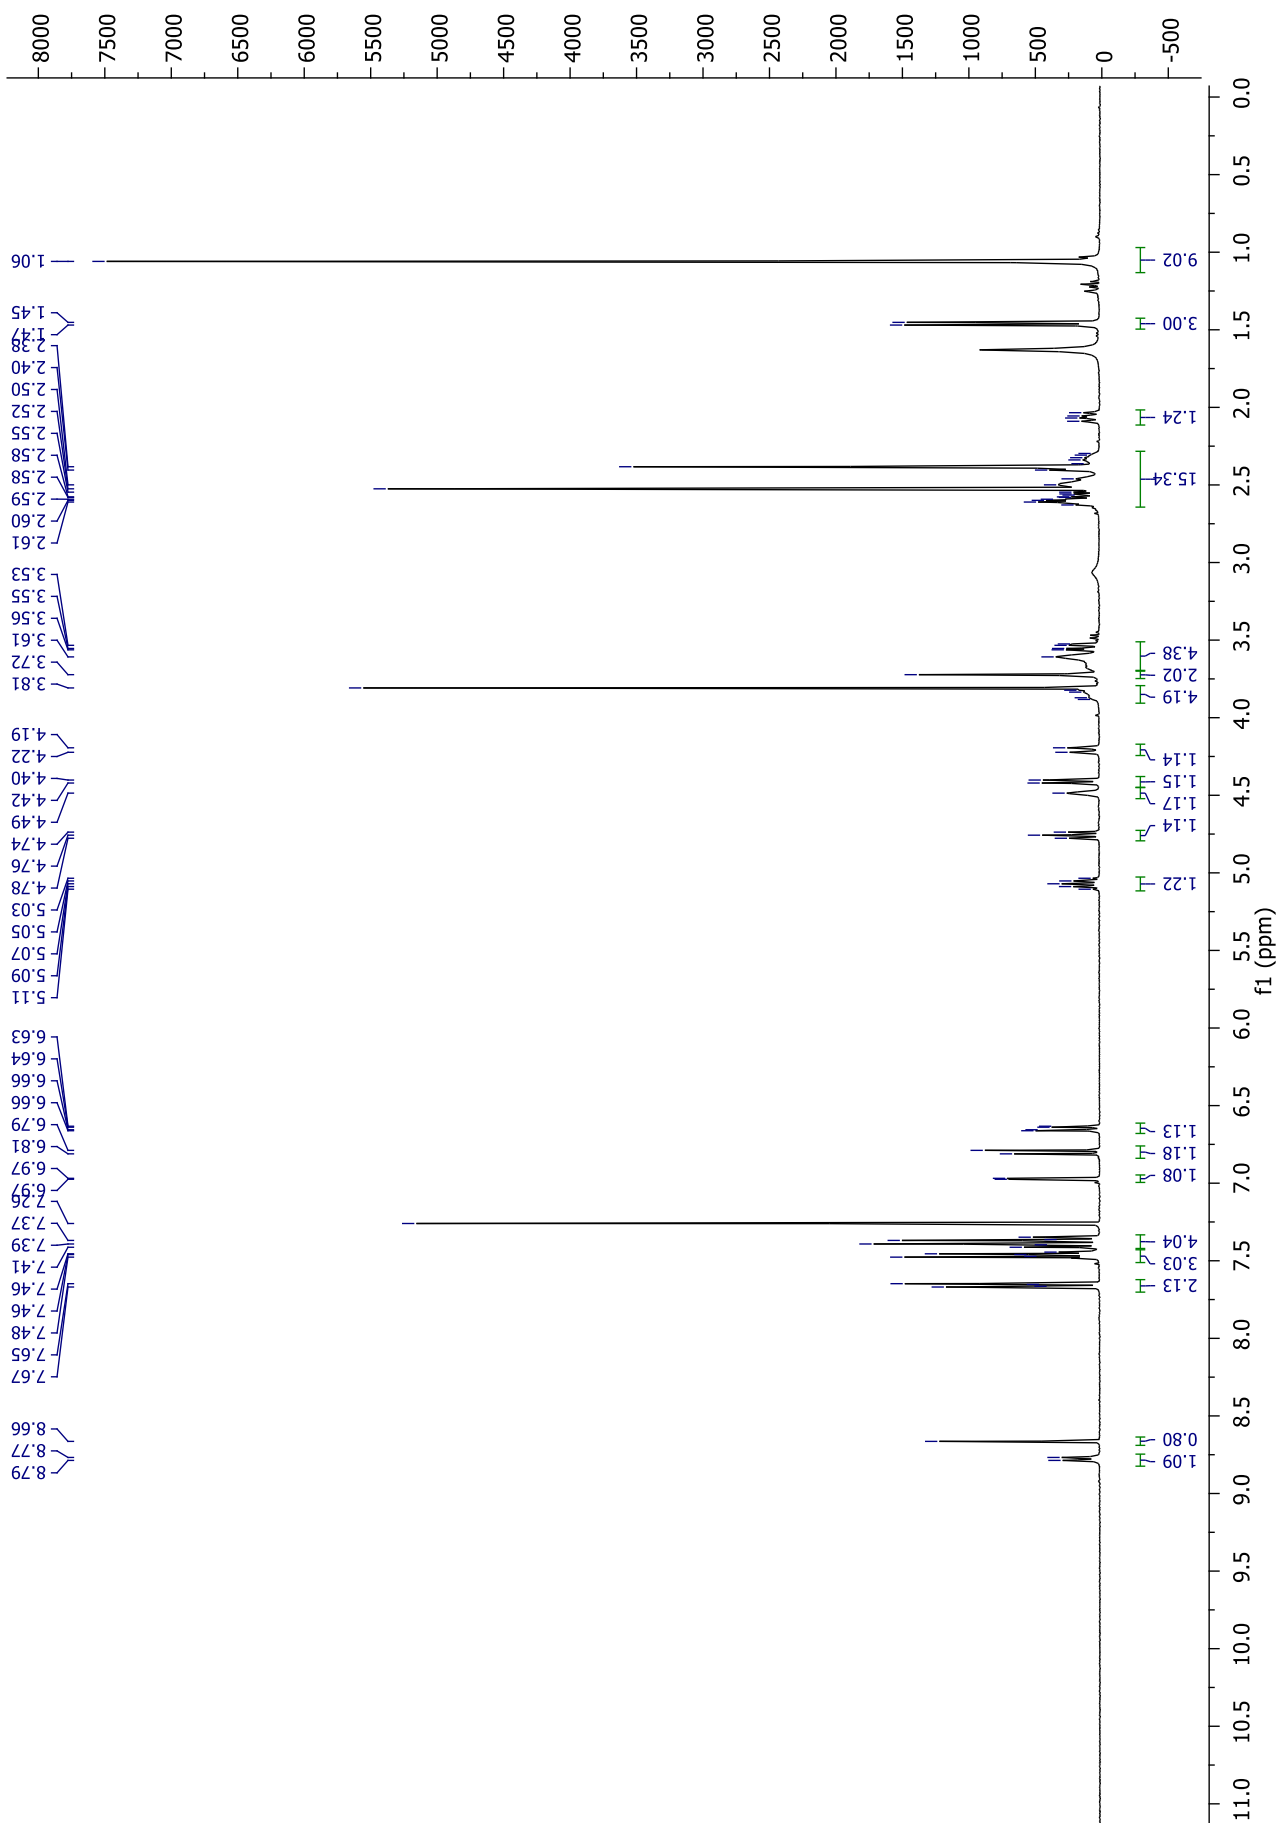

<sup>13</sup>C NMR (101 MHz, CDCl<sub>3</sub>) spectrum of **PROTAC-6**.

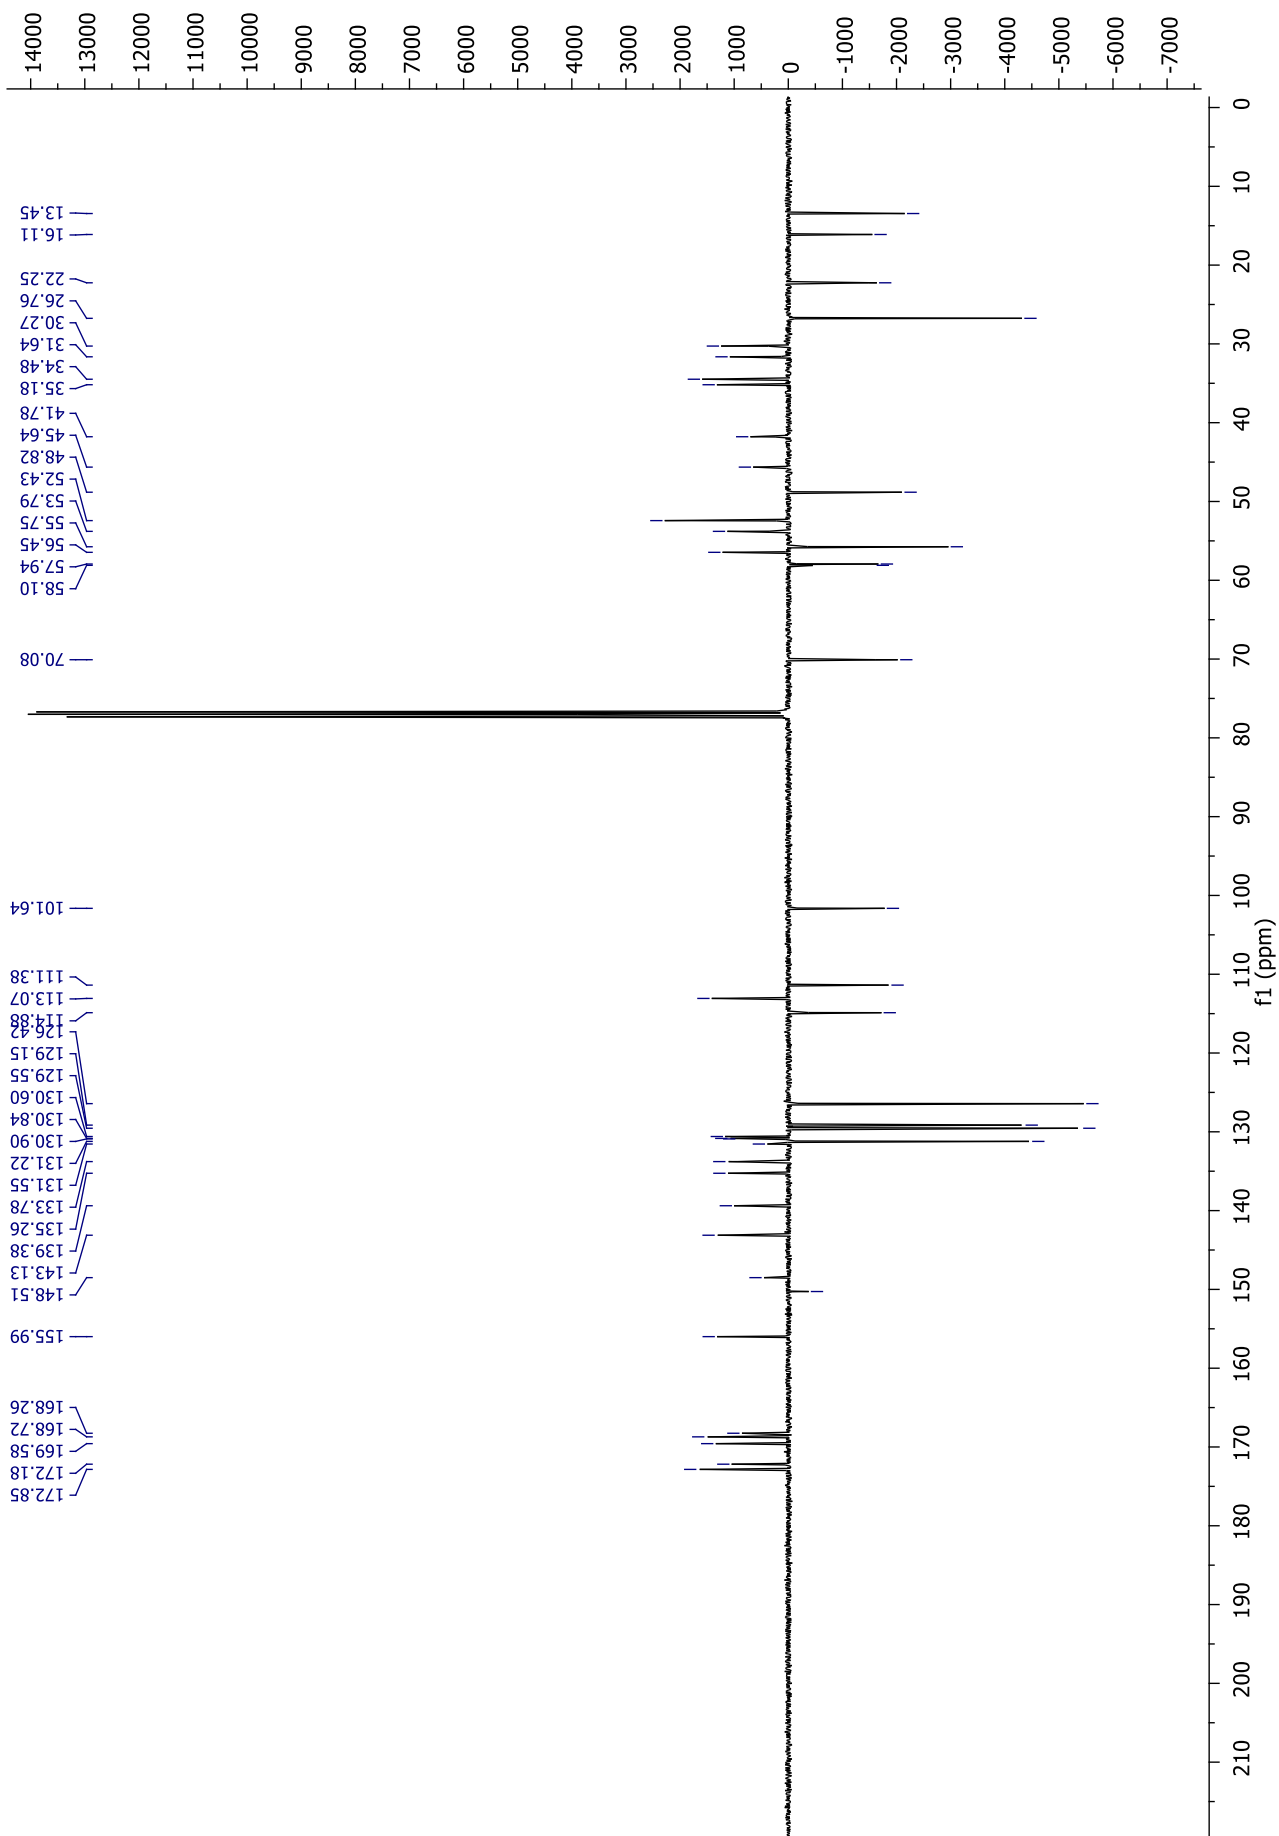

<sup>1</sup>H NMR (400 MHz, CDCl<sub>3</sub>) spectrum of **PROTAC-8**.

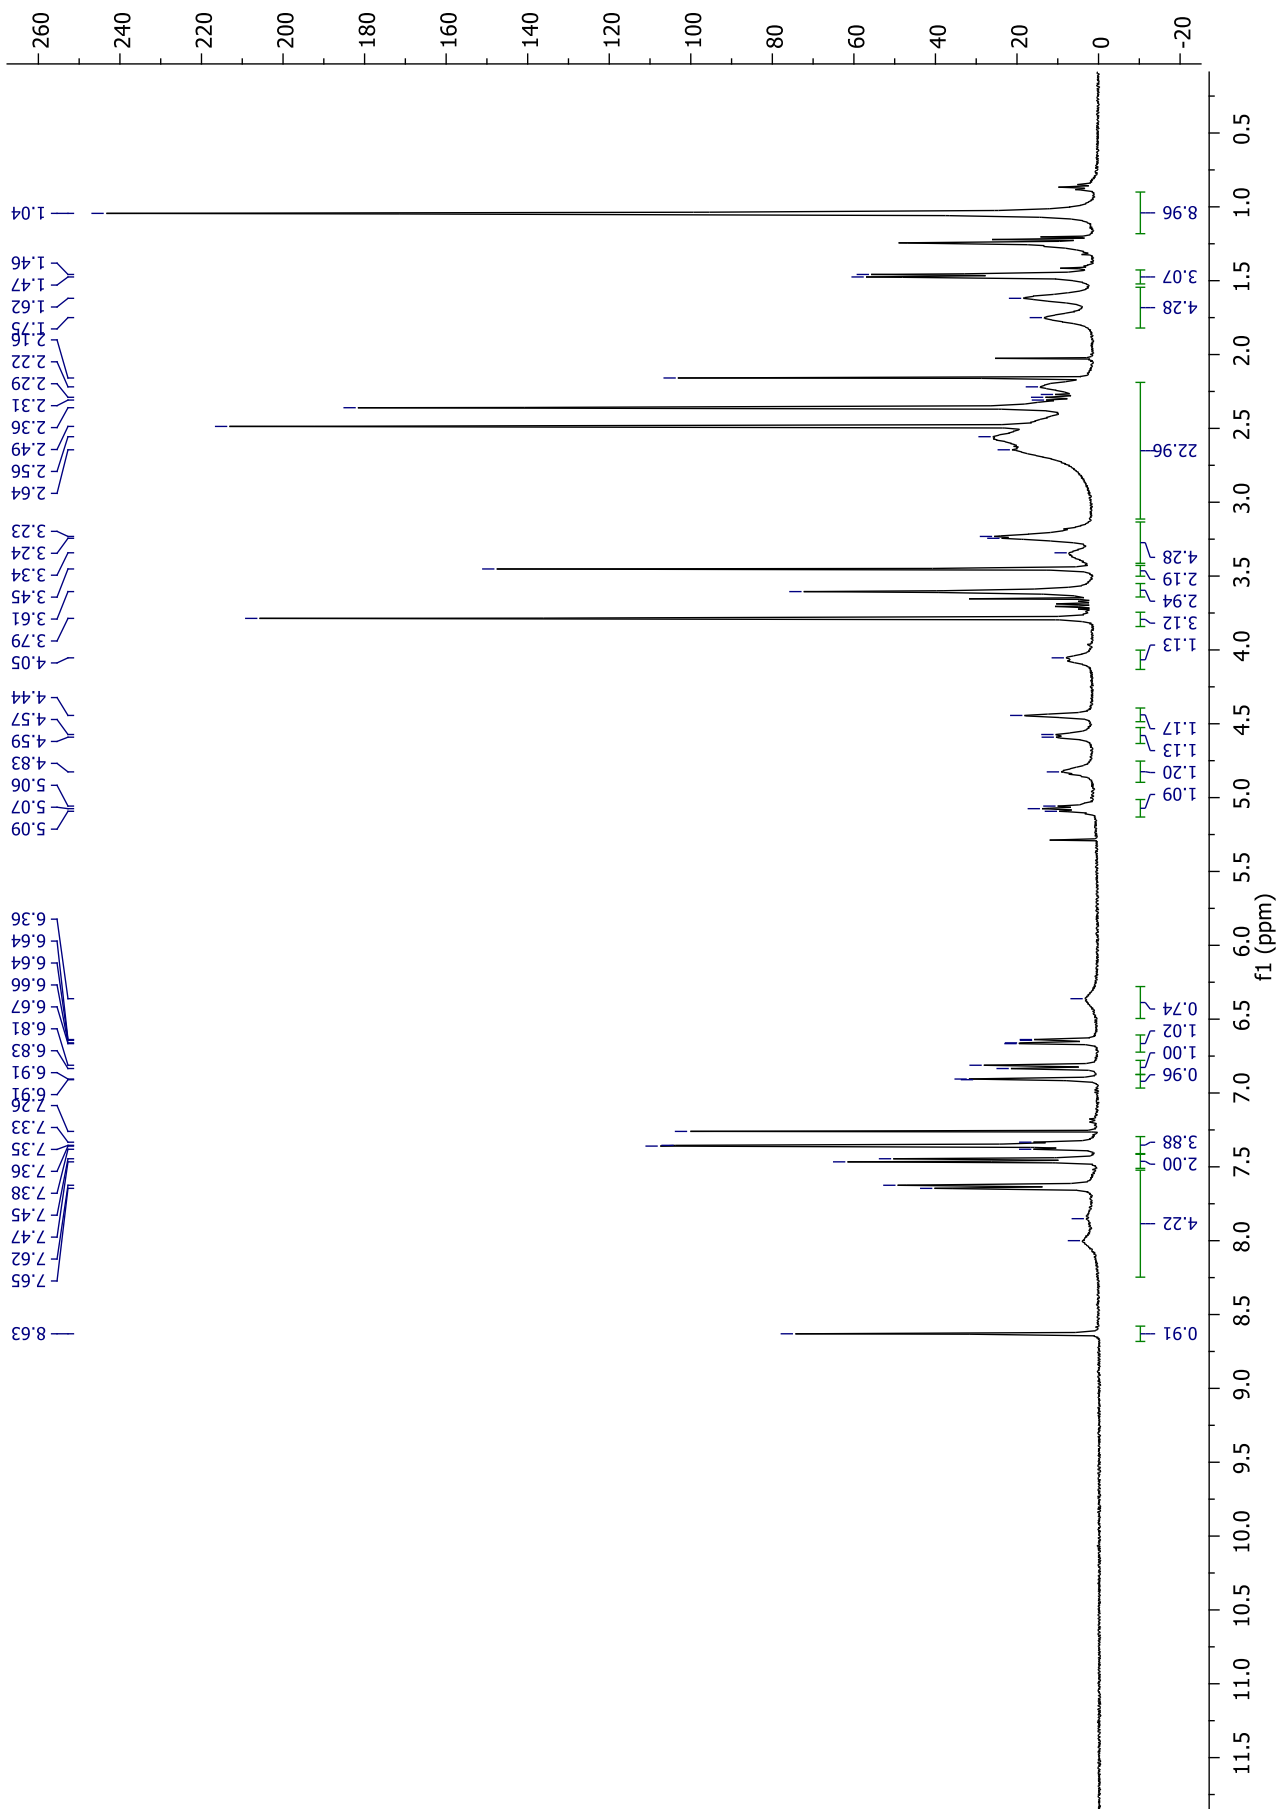



<sup>1</sup>H NMR (400 MHz, CDCl<sub>3</sub>) spectrum of **PROTAC-10**.

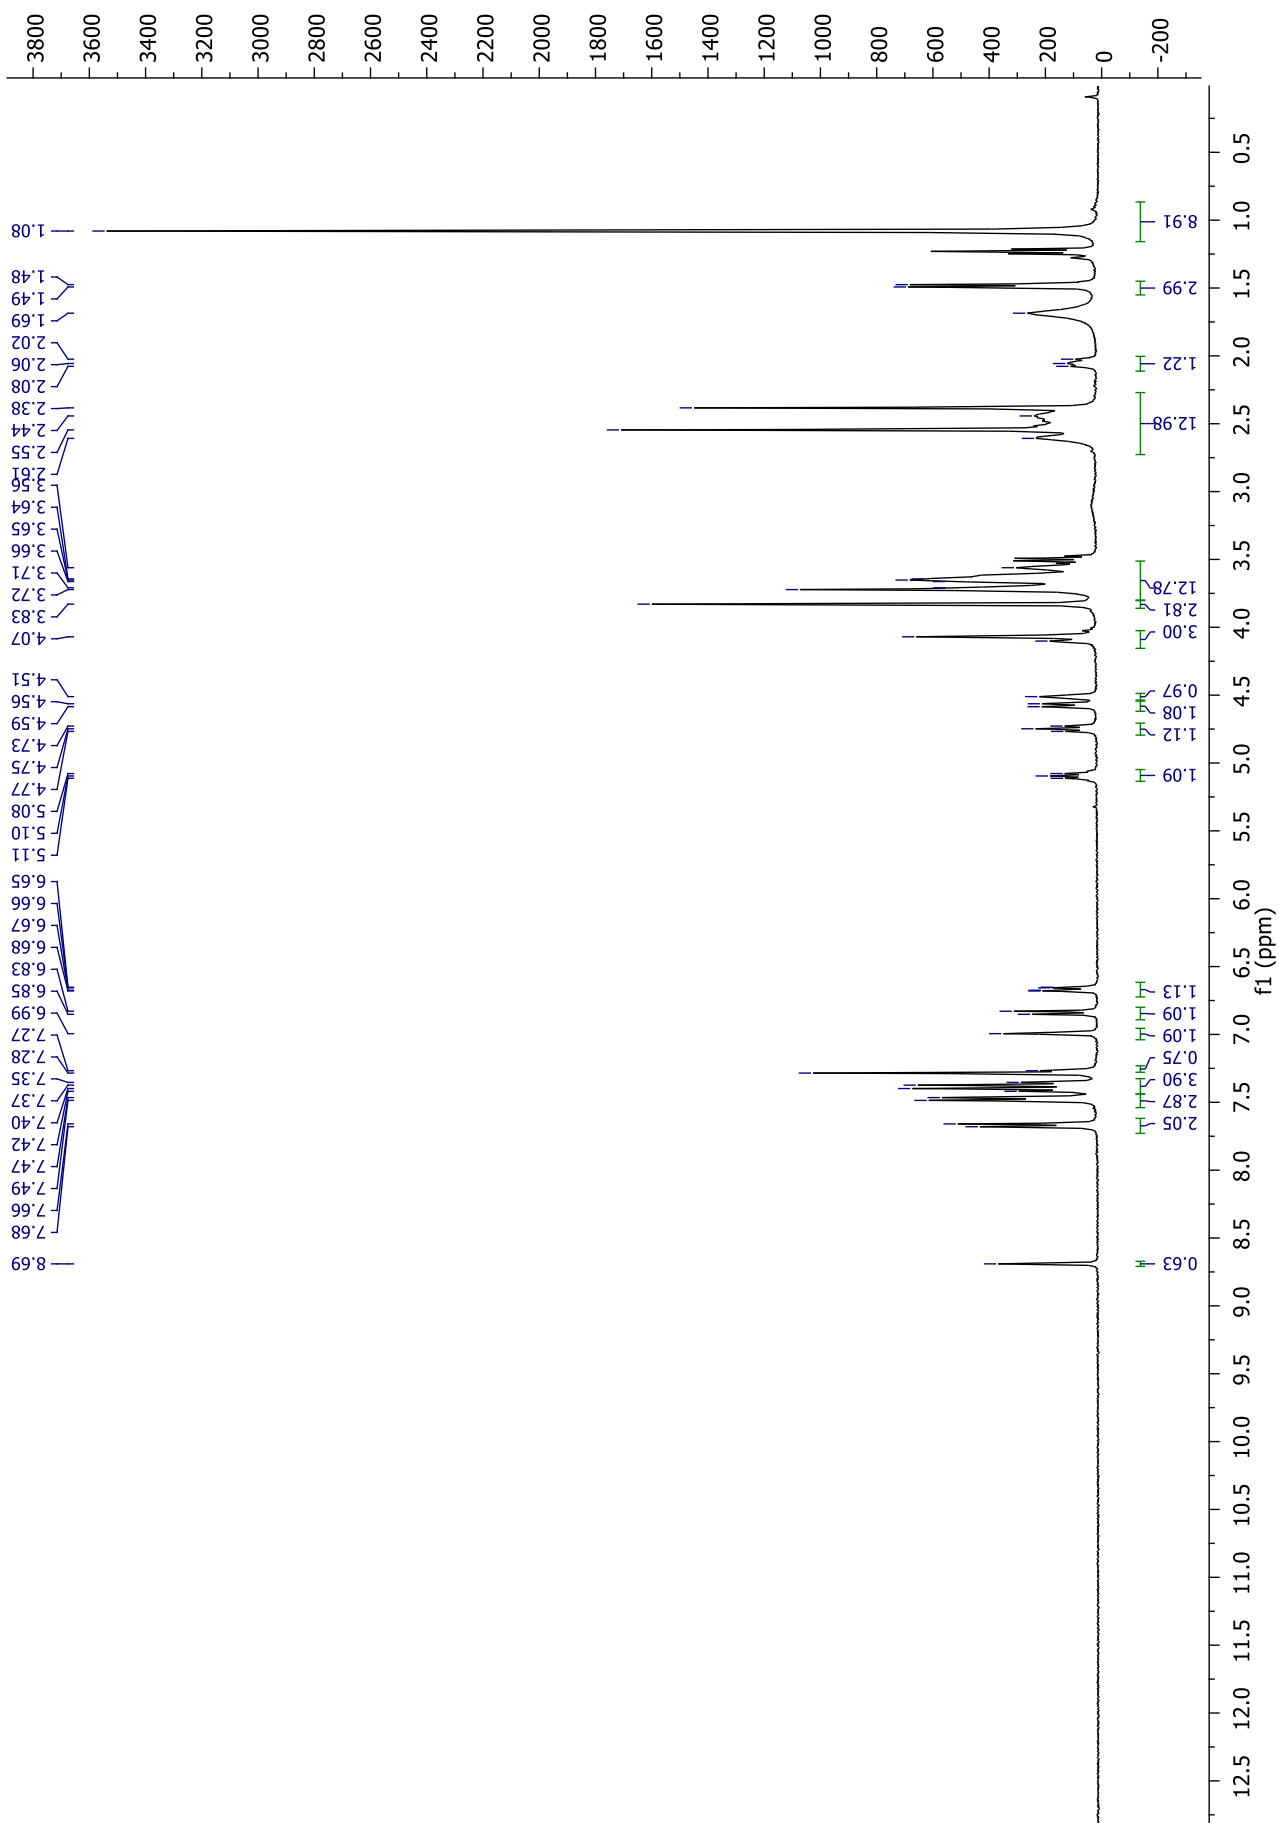

<sup>13</sup>C NMR (101 MHz, CDCl<sub>3</sub>) spectrum of **PROTAC-10**.

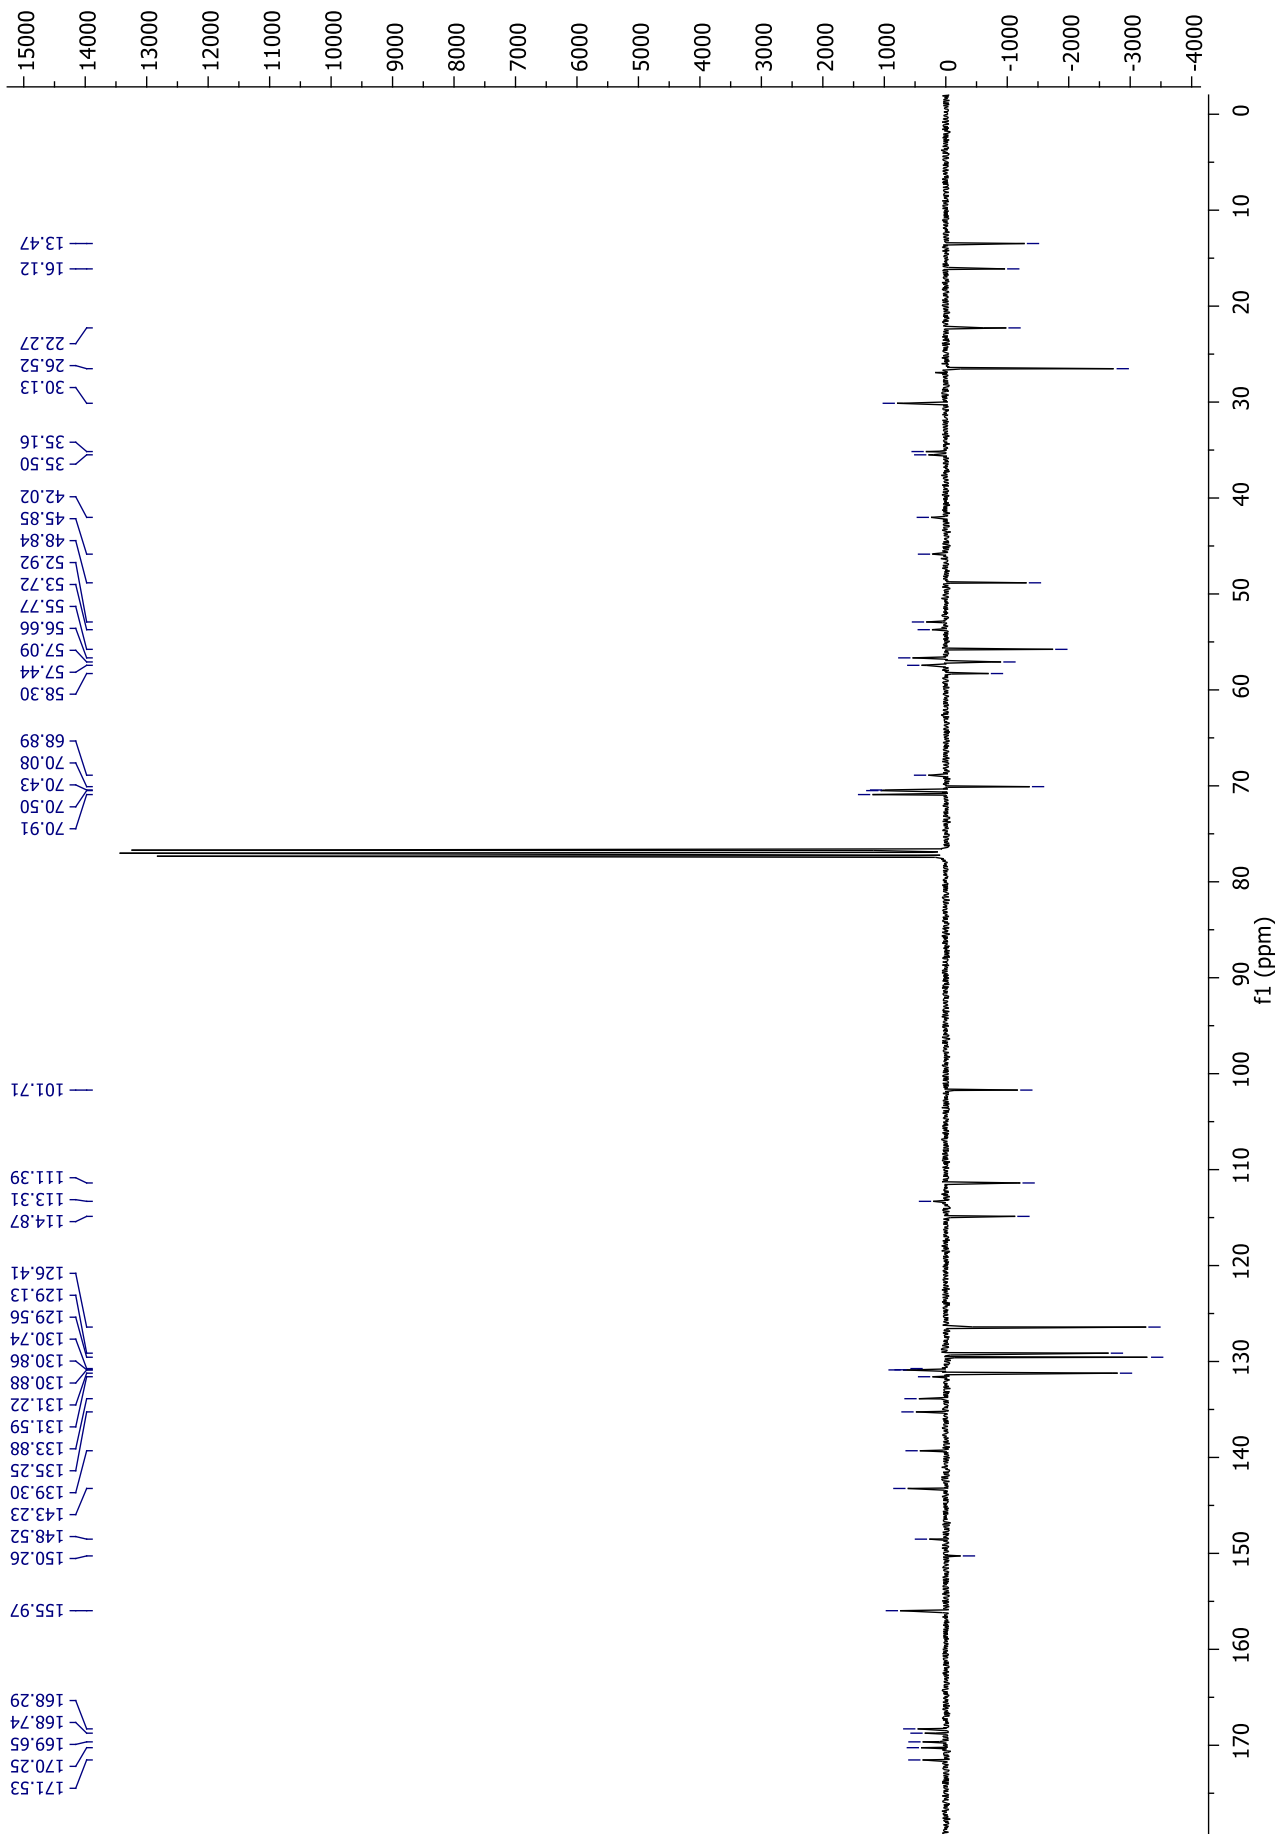

<sup>1</sup>H NMR (400 MHz, DMSO-d<sub>6</sub>) spectrum of **PROTAC-11**.

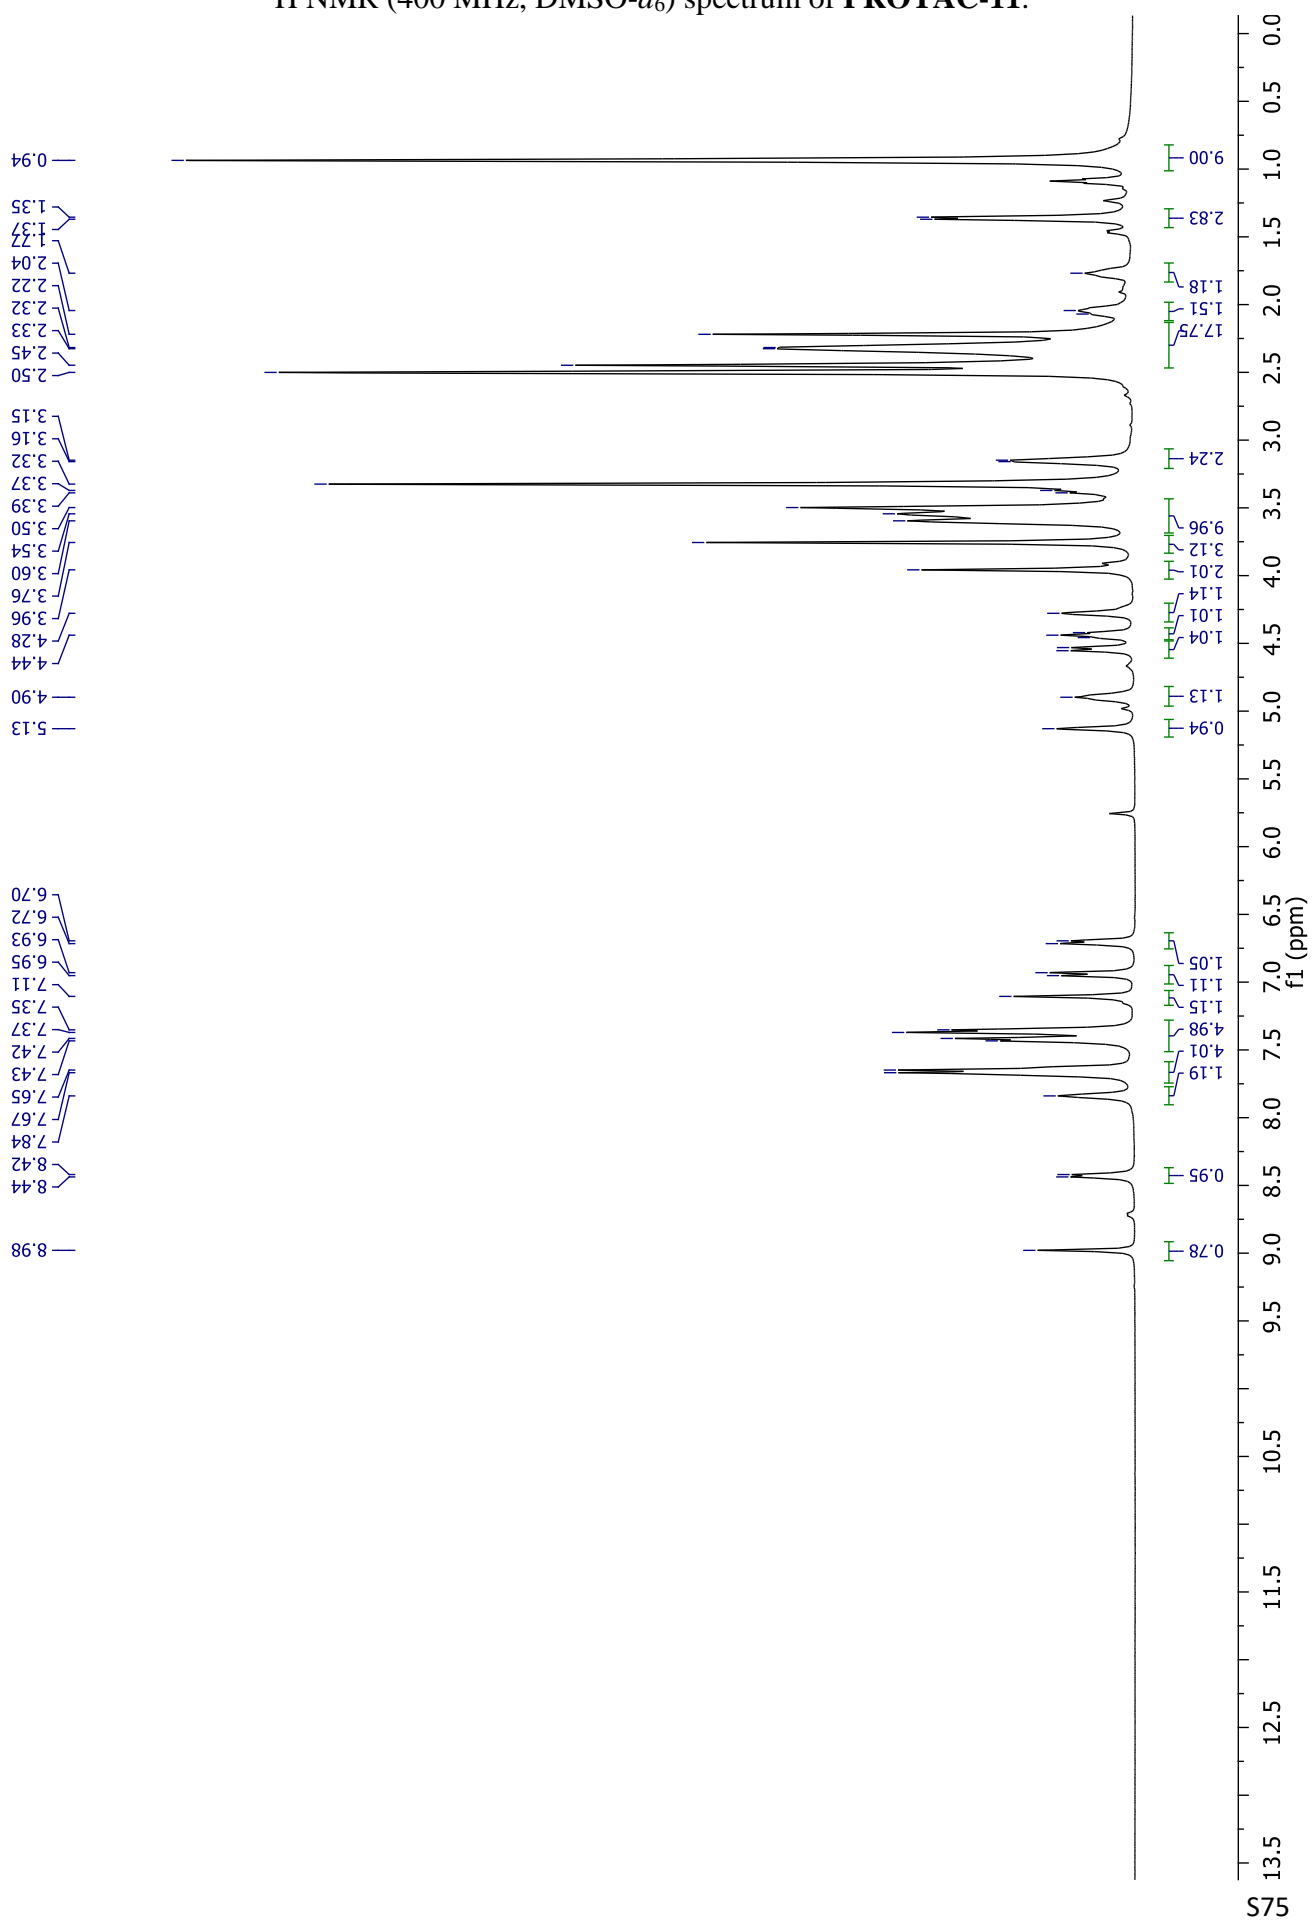

<sup>13</sup>C NMR (101 MHz, DMSO-*d*<sub>6</sub>) spectrum of **PROTAC-11**.

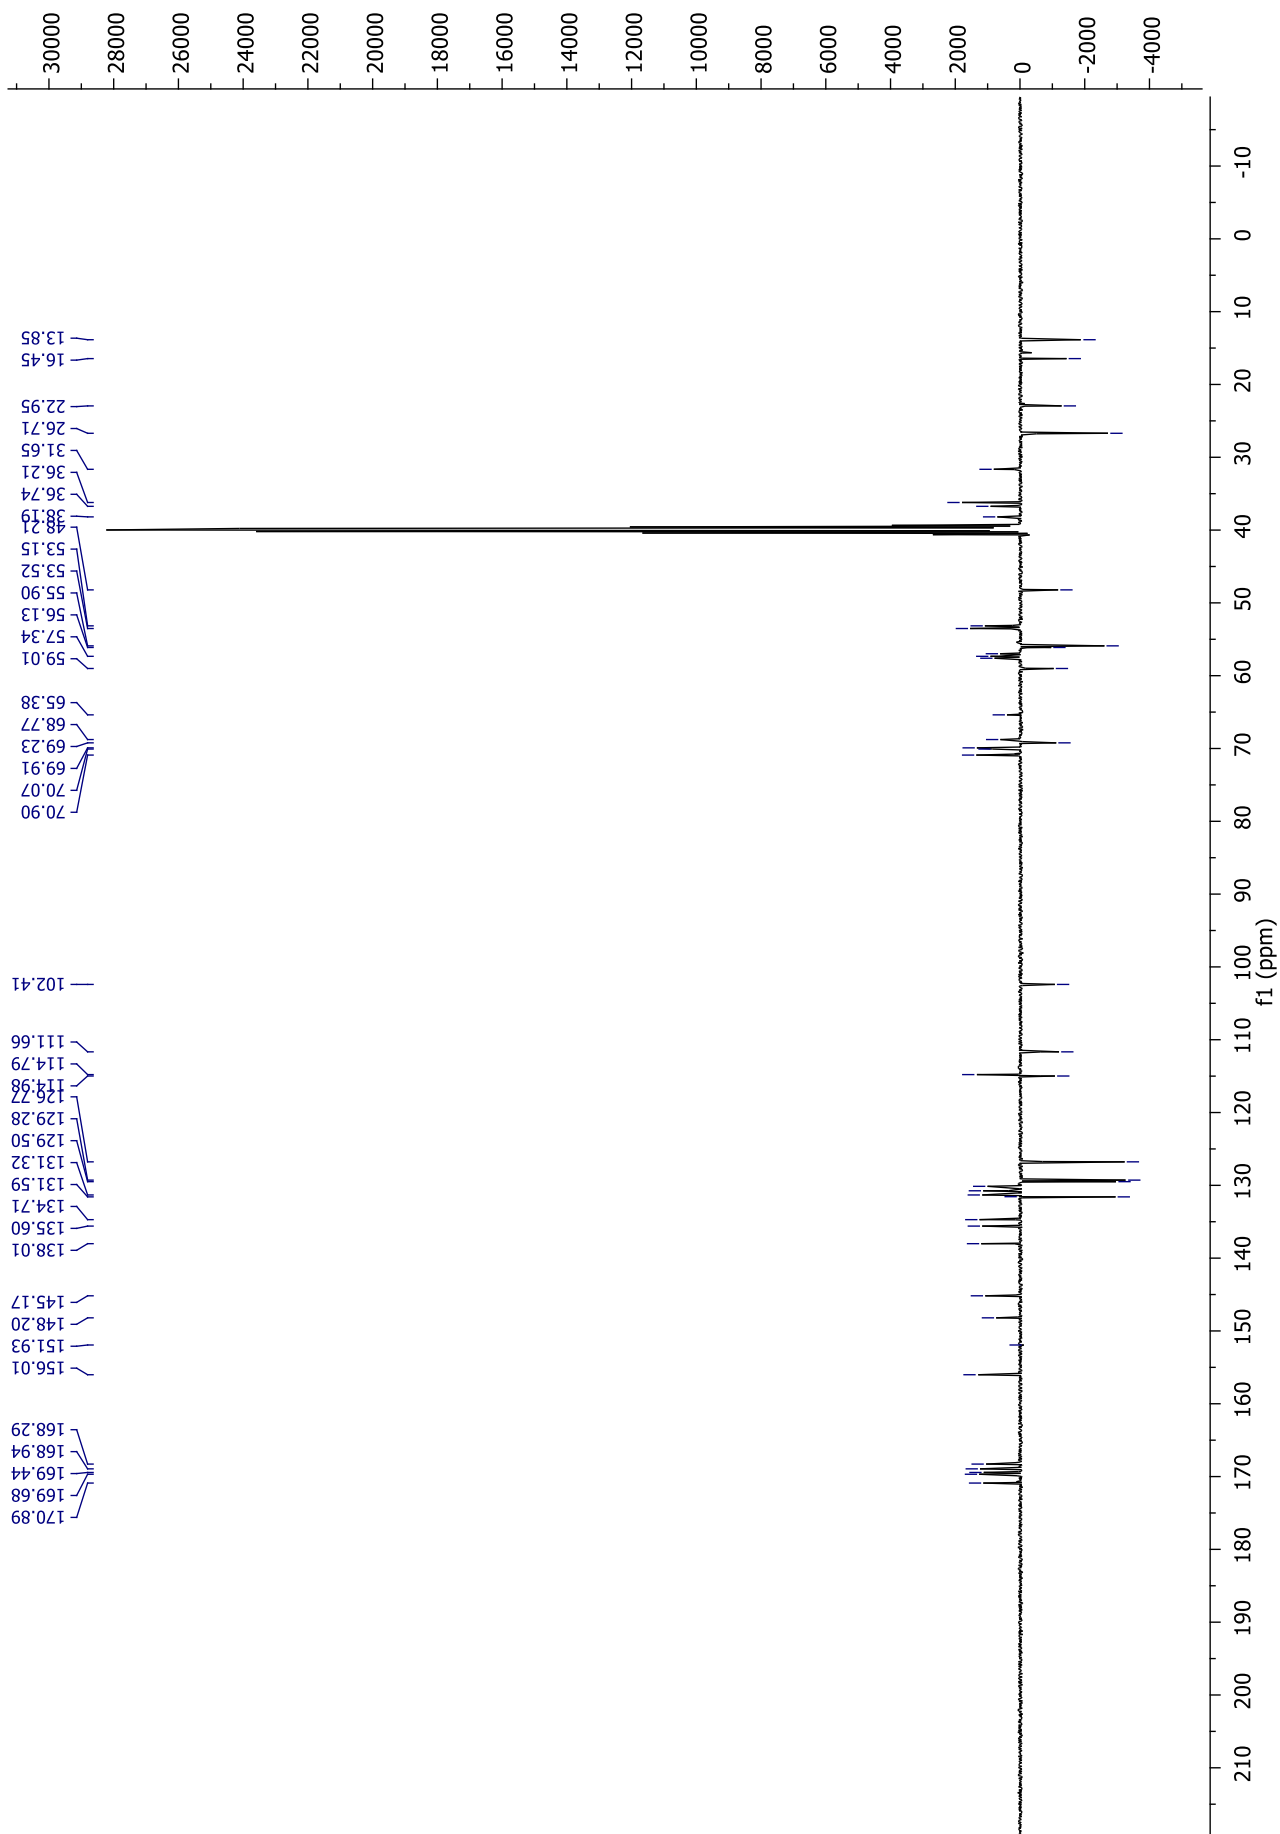

# HRMS spectrum of compound 1.

## Compound Table

| Compound Label                                            | RT    | Mass     | Abund | Formula                                            | Tgt Mass  | Diff (ppm) | MFG Formula                                        | DB Formula                                         |
|-----------------------------------------------------------|-------|----------|-------|----------------------------------------------------|-----------|------------|----------------------------------------------------|----------------------------------------------------|
| Cpd 1: C <sub>24</sub> H <sub>22</sub> ClN <sub>5</sub> O | 3.433 | 431.1515 | 77890 | C <sub>24</sub> H <sub>22</sub> ClN <sub>5</sub> O | 431.15129 | 0.5        | C <sub>24</sub> H <sub>22</sub> ClN <sub>5</sub> O | C <sub>24</sub> H <sub>22</sub> ClN <sub>5</sub> O |

| Compound Label                                            | m/z      | RT    | Algorithm       | Mass     |
|-----------------------------------------------------------|----------|-------|-----------------|----------|
| Cpd 1: C <sub>24</sub> H <sub>22</sub> ClN <sub>5</sub> O | 216.5833 | 3.433 | Find By Formula | 431.1515 |

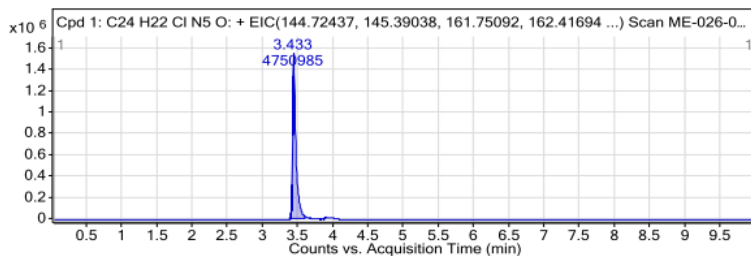

## MS Zoomed Spectrum

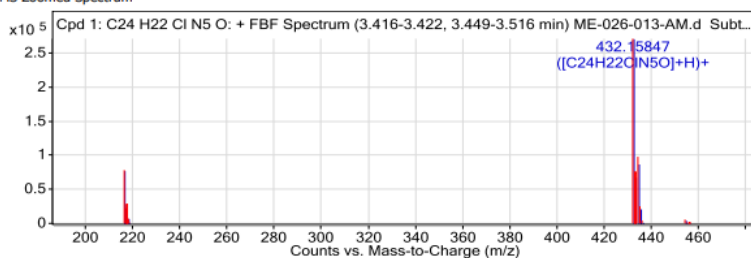

## MS Spectrum Peak List

| m/z       | z | Abund     | Formula                                            | Ion                  |
|-----------|---|-----------|----------------------------------------------------|----------------------|
| 216.5833  | 2 | 77889.99  | C <sub>24</sub> H <sub>22</sub> ClN <sub>5</sub> O | (M+2H) <sup>2+</sup> |
| 217.08471 | 2 | 23385.09  | C <sub>24</sub> H <sub>22</sub> ClN <sub>5</sub> O | (M+2H) <sup>2+</sup> |
| 217.58224 | 2 | 27406.07  | C <sub>24</sub> H <sub>22</sub> ClN <sub>5</sub> O | (M+2H) <sup>2+</sup> |
| 218.08336 | 2 | 7813.81   | C <sub>24</sub> H <sub>22</sub> ClN <sub>5</sub> O | (M+2H) <sup>2+</sup> |
| 432.15847 | 1 | 270760.97 | C <sub>24</sub> H <sub>22</sub> ClN <sub>5</sub> O | (M+H) <sup>+</sup>   |
| 433.16198 | 1 | 68625.46  | C <sub>24</sub> H <sub>22</sub> ClN <sub>5</sub> O | (M+H) <sup>+</sup>   |
| 434.15691 | 1 | 87947.71  | C <sub>24</sub> H <sub>22</sub> ClN <sub>5</sub> O | (M+H) <sup>+</sup>   |
| 435.15908 | 1 | 22893.99  | C <sub>24</sub> H <sub>22</sub> ClN <sub>5</sub> O | (M+H) <sup>+</sup>   |
| 436.16114 | 1 | 3042.03   | C <sub>24</sub> H <sub>22</sub> ClN <sub>5</sub> O | (M+H) <sup>+</sup>   |
| 454.14063 | 1 | 5555.31   | C <sub>24</sub> H <sub>22</sub> ClN <sub>5</sub> O | (M+Na) <sup>+</sup>  |

## HRMS spectrum of compound 2.

### Compound Table

| Compound Label           | Data File       | RT    | Mass      | Abund  | Formula           | Tgt Mass  | Diff (ppm) | MFG Formula       | DB Formula        |
|--------------------------|-----------------|-------|-----------|--------|-------------------|-----------|------------|-------------------|-------------------|
| Cpd 2: C24 H27 Cl N6 O S | FC-025-031-AM.d | 3.735 | 482.16607 | 221941 | C24 H27 Cl N6 O S | 482.16556 | 1.07       | C24 H27 Cl N6 O S | C24 H27 Cl N6 O S |

| Compound Label           | m/z       | RT    | Algorithm       | Mass      |
|--------------------------|-----------|-------|-----------------|-----------|
| Cpd 2: C24 H27 Cl N6 O S | 483.17309 | 3.735 | Find By Formula | 482.16607 |

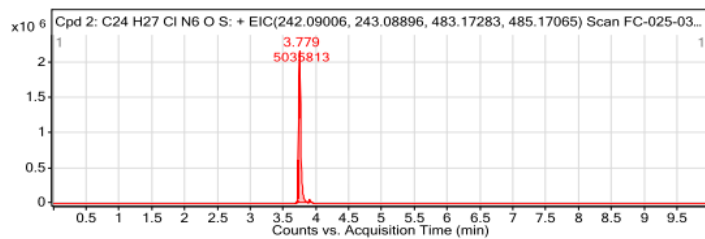

### MS Spectrum

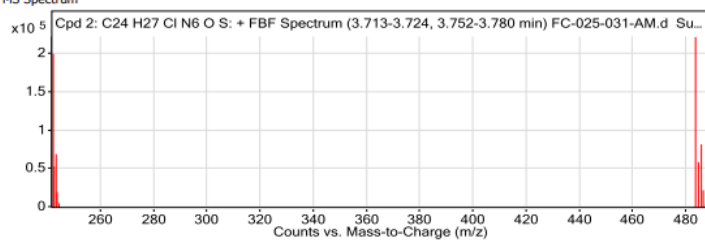

### MS Zoomed Spectrum

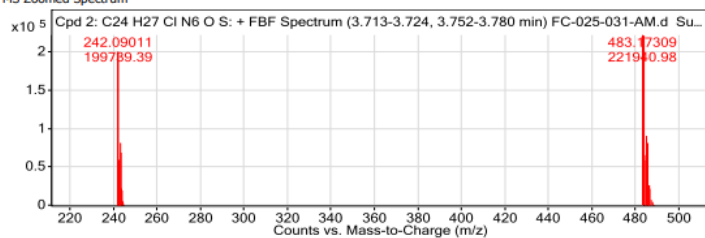

### MS Spectrum Peak List

| m/z       | z | Abund     | Formula      | Ion      |
|-----------|---|-----------|--------------|----------|
| 242.09011 | 2 | 199739.39 | C24H27ClN6OS | (M+2H)+2 |
| 242.59181 | 2 | 53855.64  | C24H27ClN6OS | (M+2H)+2 |
| 243.0897  | 2 | 70304.95  | C24H27ClN6OS | (M+2H)+2 |
| 243.59060 | 2 | 26498.36  | C24H27ClN6OS | (M+2H)+2 |
| 244.08977 | 2 | 5990.6    | C24H27ClN6OS | (M+2H)+2 |
| 480.17389 | 1 | 221940.98 | C24H27ClN6OS | (M+H)+   |
| 484.17648 | 1 | 58752.84  | C24H27ClN6OS | (M+H)+   |
| 485.17134 | 1 | 82745.75  | C24H27ClN6OS | (M+H)+   |
| 486.17328 | 1 | 22604.06  | C24H27ClN6OS | (M+H)+   |
| 487.17244 | 1 | 5521.21   | C24H27ClN6OS | (M+H)+   |

## HRMS spectrum of compound 3.

**Compound Table**

| Compound Label         | RT    | Mass      | Abund | Formula         | Tgt Mass  | Diff (ppm) | MFG Formula     | DB Formula      |
|------------------------|-------|-----------|-------|-----------------|-----------|------------|-----------------|-----------------|
| Cpd 2: C21 H21 F N4 O2 | 2.497 | 380.16542 | 17094 | C21 H21 F N4 O2 | 380.16485 | 1.48       | C21 H21 F N4 O2 | C21 H21 F N4 O2 |

| Compound Label         | m/z       | RT    | Algorithm       | Mass      |
|------------------------|-----------|-------|-----------------|-----------|
| Cpd 2: C21 H21 F N4 O2 | 403.15473 | 2.497 | Find By Formula | 380.16542 |

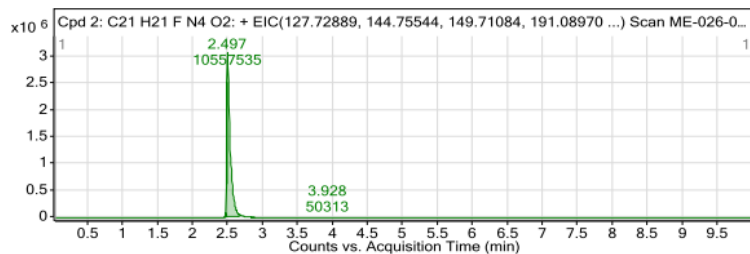

**MS Zoomed Spectrum**

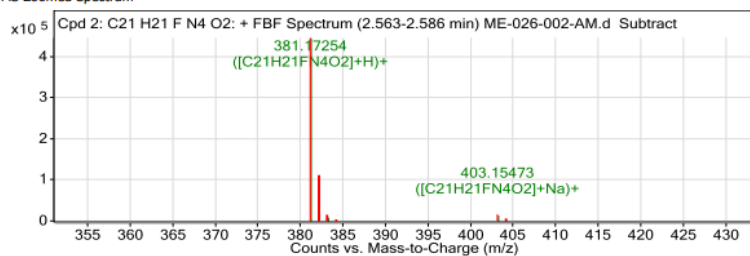

**MS Spectrum Peak List**

| m/z       | z | Abund     | Formula     | Ion     |
|-----------|---|-----------|-------------|---------|
| 381.17254 | 1 | 445260.34 | C21H21FN4O2 | (M+H)+  |
| 382.17625 | 1 | 103009.89 | C21H21FN4O2 | (M+H)+  |
| 383.17887 | 1 | 12315.31  | C21H21FN4O2 | (M+H)+  |
| 384.18241 | 1 | 1354.61   | C21H21FN4O2 | (M+H)+  |
| 403.15473 | 1 | 17094.26  | C21H21FN4O2 | (M+Na)+ |
| 404.15767 | 1 | 4194.51   | C21H21FN4O2 | (M+Na)+ |
| 405.16263 | 1 | 533.82    | C21H21FN4O2 | (M+Na)+ |

## HRMS spectrum of compound 4.

**Compound Table**

| Compound Label                                                         | RT    | Mass    | Abund | Formula                                                         | Tgt Mass  | Diff (ppm) | MFG Formula                                                     | DB Formula                                                      |
|------------------------------------------------------------------------|-------|---------|-------|-----------------------------------------------------------------|-----------|------------|-----------------------------------------------------------------|-----------------------------------------------------------------|
| Cpd 1: C <sub>24</sub> H <sub>26</sub> ClN <sub>3</sub> O <sub>3</sub> | 4.216 | 439.167 | 72866 | C <sub>24</sub> H <sub>26</sub> ClN <sub>3</sub> O <sub>3</sub> | 439.16627 | 1.66       | C <sub>24</sub> H <sub>26</sub> ClN <sub>3</sub> O <sub>3</sub> | C <sub>24</sub> H <sub>26</sub> ClN <sub>3</sub> O <sub>3</sub> |

| Compound Label                                                         | m/z       | RT    | Algorithm       | Mass    |
|------------------------------------------------------------------------|-----------|-------|-----------------|---------|
| Cpd 1: C <sub>24</sub> H <sub>26</sub> ClN <sub>3</sub> O <sub>3</sub> | 462.15633 | 4.216 | Find By Formula | 439.167 |

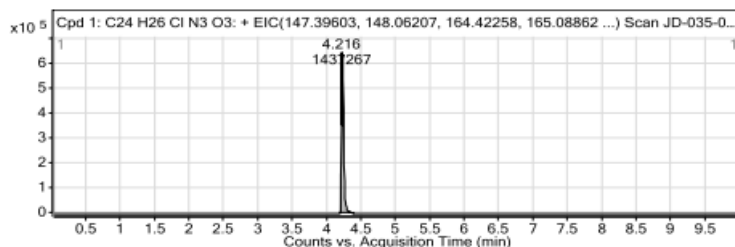

**MS Spectrum**

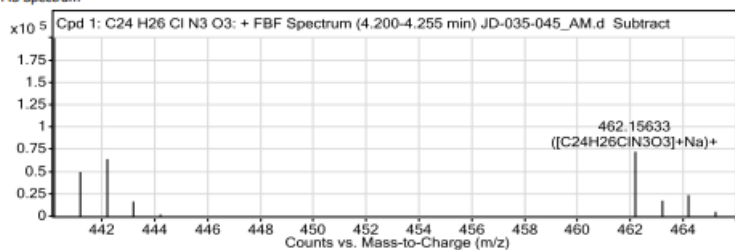

**MS Zoomed Spectrum**

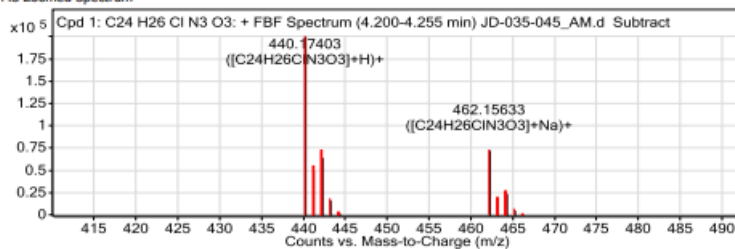

**MS Spectrum Peak List**

| m/z       | z | Abund     | Formula                                                         | Ion     |
|-----------|---|-----------|-----------------------------------------------------------------|---------|
| 440.17403 | 1 | 200508.66 | C <sub>24</sub> H <sub>26</sub> ClN <sub>3</sub> O <sub>3</sub> | (M+H)+  |
| 441.17762 | 1 | 50471.35  | C <sub>24</sub> H <sub>26</sub> ClN <sub>3</sub> O <sub>3</sub> | (M+H)+  |
| 442.17274 | 1 | 65504.16  | C <sub>24</sub> H <sub>26</sub> ClN <sub>3</sub> O <sub>3</sub> | (M+H)+  |
| 443.17494 | 1 | 17502.03  | C <sub>24</sub> H <sub>26</sub> ClN <sub>3</sub> O <sub>3</sub> | (M+H)+  |
| 444.17678 | 1 | 2706.38   | C <sub>24</sub> H <sub>26</sub> ClN <sub>3</sub> O <sub>3</sub> | (M+H)+  |
| 462.15633 | 1 | 72865.53  | C <sub>24</sub> H <sub>26</sub> ClN <sub>3</sub> O <sub>3</sub> | (M+Na)+ |
| 463.15968 | 1 | 18891.42  | C <sub>24</sub> H <sub>26</sub> ClN <sub>3</sub> O <sub>3</sub> | (M+Na)+ |
| 464.15441 | 1 | 25094.98  | C <sub>24</sub> H <sub>26</sub> ClN <sub>3</sub> O <sub>3</sub> | (M+Na)+ |
| 465.15664 | 1 | 6470.82   | C <sub>24</sub> H <sub>26</sub> ClN <sub>3</sub> O <sub>3</sub> | (M+Na)+ |
| 466.16047 | 1 | 1088.37   | C <sub>24</sub> H <sub>26</sub> ClN <sub>3</sub> O <sub>3</sub> | (M+Na)+ |



## HRMS spectrum of compound 5.

**Compound Table**

| Compound Label                                                           | RT    | Mass      | Abund  | Formula                                                           | Tgt Mass  | Diff (ppm) | MFG Formula                                                       | DB Formula                                                        |
|--------------------------------------------------------------------------|-------|-----------|--------|-------------------------------------------------------------------|-----------|------------|-------------------------------------------------------------------|-------------------------------------------------------------------|
| Cpd 1: C <sub>26</sub> H <sub>27</sub> ClN <sub>6</sub> O <sub>5</sub> S | 4.175 | 506.16704 | 252444 | C <sub>26</sub> H <sub>27</sub> ClN <sub>6</sub> O <sub>5</sub> S | 506.16556 | 2.93       | C <sub>26</sub> H <sub>27</sub> ClN <sub>6</sub> O <sub>5</sub> S | C <sub>26</sub> H <sub>27</sub> ClN <sub>6</sub> O <sub>5</sub> S |

| Compound Label                                                           | m/z       | RT    | Algorithm       | Mass      |
|--------------------------------------------------------------------------|-----------|-------|-----------------|-----------|
| Cpd 1: C <sub>26</sub> H <sub>27</sub> ClN <sub>6</sub> O <sub>5</sub> S | 507.17365 | 4.175 | Find By Formula | 506.16704 |

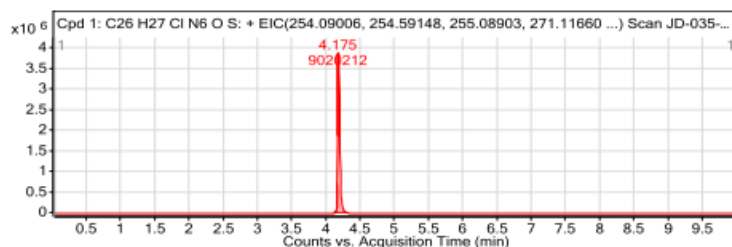

**MS Spectrum**

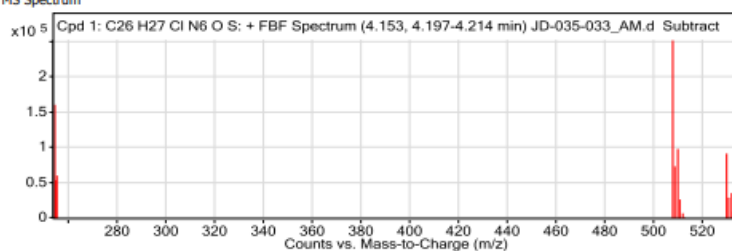

**MS Zoomed Spectrum**

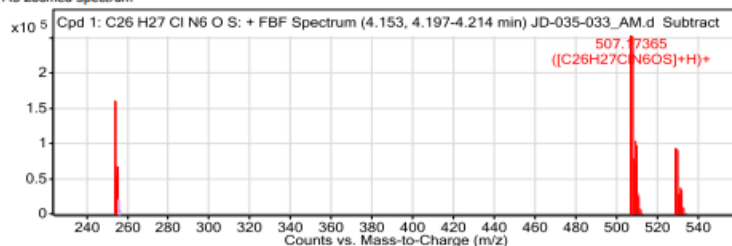

**MS Spectrum Peak List**

| m/z       | z | Abund     | Formula                                                           | Ion                  |
|-----------|---|-----------|-------------------------------------------------------------------|----------------------|
| 254.09114 | 2 | 161391.13 | C <sub>26</sub> H <sub>27</sub> ClN <sub>6</sub> O <sub>5</sub> S | (M+2H) <sup>2+</sup> |
| 254.59275 | 2 | 55129.11  | C <sub>26</sub> H <sub>27</sub> ClN <sub>6</sub> O <sub>5</sub> S | (M+2H) <sup>2+</sup> |
| 255.09029 | 2 | 61427.01  | C <sub>26</sub> H <sub>27</sub> ClN <sub>6</sub> O <sub>5</sub> S | (M+2H) <sup>2+</sup> |
| 507.17365 | 1 | 252444.22 | C <sub>26</sub> H <sub>27</sub> ClN <sub>6</sub> O <sub>5</sub> S | (M+H) <sup>+</sup>   |
| 508.17713 | 1 | 74720.04  | C <sub>26</sub> H <sub>27</sub> ClN <sub>6</sub> O <sub>5</sub> S | (M+H) <sup>+</sup>   |
| 509.17235 | 1 | 98611.59  | C <sub>26</sub> H <sub>27</sub> ClN <sub>6</sub> O <sub>5</sub> S | (M+H) <sup>+</sup>   |
| 510.17383 | 1 | 26748.6   | C <sub>26</sub> H <sub>27</sub> ClN <sub>6</sub> O <sub>5</sub> S | (M+H) <sup>+</sup>   |
| 529.1561  | 1 | 91951.59  | C <sub>26</sub> H <sub>27</sub> ClN <sub>6</sub> O <sub>5</sub> S | (M+Na) <sup>+</sup>  |
| 530.15825 | 1 | 29348.04  | C <sub>26</sub> H <sub>27</sub> ClN <sub>6</sub> O <sub>5</sub> S | (M+Na) <sup>+</sup>  |
| 531.15398 | 1 | 36182.77  | C <sub>26</sub> H <sub>27</sub> ClN <sub>6</sub> O <sub>5</sub> S | (M+Na) <sup>+</sup>  |

## HRMS spectrum of compound 7.

**Compound Table**

| Compound Label         | RT    | Mass      | Abund | Formula         | Tgt Mass  | Diff (ppm) | MFG Formula     | DB Formula      |
|------------------------|-------|-----------|-------|-----------------|-----------|------------|-----------------|-----------------|
| Cpd 1: C27 H25 F N4 O2 | 3.209 | 456.19619 | 9569  | C27 H25 F N4 O2 | 456.19615 | 0.09       | C27 H25 F N4 O2 | C27 H25 F N4 O2 |

| Compound Label         | m/z       | RT    | Algorithm       | Mass      |
|------------------------|-----------|-------|-----------------|-----------|
| Cpd 1: C27 H25 F N4 O2 | 479.18551 | 3.209 | Find By Formula | 456.19619 |

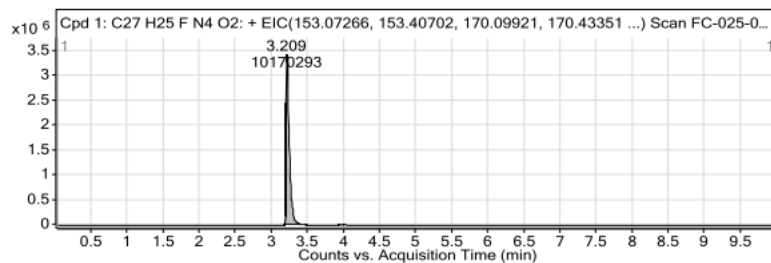

**MS Zoomed Spectrum**

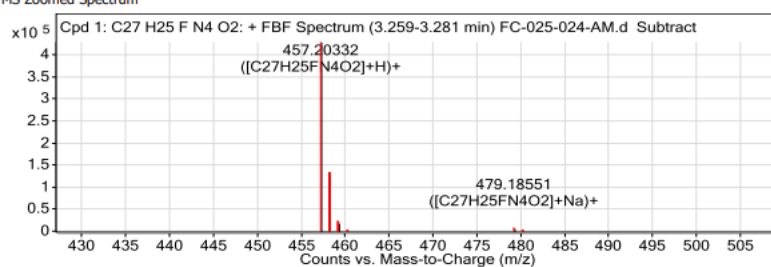

**MS Spectrum Peak List**

| m/z       | z | Abund     | Formula     | Ion     |
|-----------|---|-----------|-------------|---------|
| 457.20332 | 1 | 429313.41 | C27H25FN4O2 | (M+H)+  |
| 458.20707 | 1 | 124024.29 | C27H25FN4O2 | (M+H)+  |
| 459.20943 | 1 | 19469.61  | C27H25FN4O2 | (M+H)+  |
| 460.2128  | 1 | 2220.07   | C27H25FN4O2 | (M+H)+  |
| 479.18551 | 1 | 9568.84   | C27H25FN4O2 | (M+Na)+ |
| 480.1888  | 1 | 2850.79   | C27H25FN4O2 | (M+Na)+ |
| 481.19254 | 1 | 422.58    | C27H25FN4O2 | (M+Na)+ |

## HRMS spectrum of compound 8.

**Compound Table**

| Compound Label                                                         | RT    | Mass      | Abund  | Formula                                                         | Tgt Mass  | Diff (ppm) | MFG Formula                                                     | DB Formula                                                      |
|------------------------------------------------------------------------|-------|-----------|--------|-----------------------------------------------------------------|-----------|------------|-----------------------------------------------------------------|-----------------------------------------------------------------|
| Cpd 1: C <sub>26</sub> H <sub>24</sub> ClN <sub>5</sub> O <sub>2</sub> | 3.581 | 473.16269 | 289435 | C <sub>26</sub> H <sub>24</sub> ClN <sub>5</sub> O <sub>2</sub> | 473.16185 | 1.76       | C <sub>26</sub> H <sub>24</sub> ClN <sub>5</sub> O <sub>2</sub> | C <sub>26</sub> H <sub>24</sub> ClN <sub>5</sub> O <sub>2</sub> |

| Compound Label                                                         | m/z       | RT    | Algorithm       | Mass      |
|------------------------------------------------------------------------|-----------|-------|-----------------|-----------|
| Cpd 1: C <sub>26</sub> H <sub>24</sub> ClN <sub>5</sub> O <sub>2</sub> | 474.16951 | 3.581 | Find By Formula | 473.16269 |

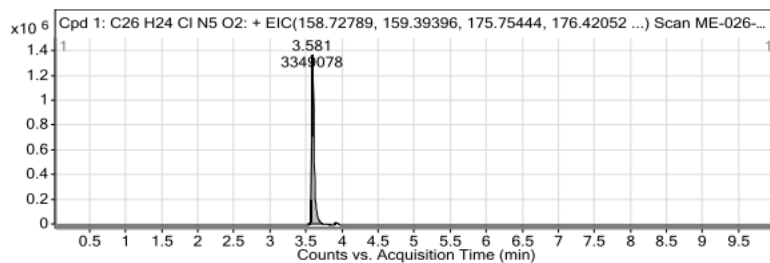

**MS Zoomed Spectrum**

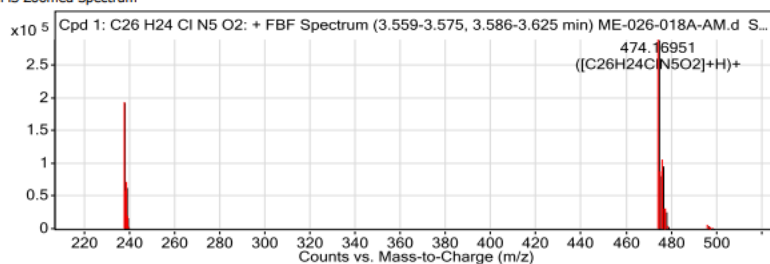

**MS Spectrum Peak List**

| m/z       | z | Abund     | Formula                                                         | Ion      |
|-----------|---|-----------|-----------------------------------------------------------------|----------|
| 237.58853 | 2 | 193613.3  | C <sub>26</sub> H <sub>24</sub> ClN <sub>5</sub> O <sub>2</sub> | (M+2H)+2 |
| 238.09059 | 2 | 53172.35  | C <sub>26</sub> H <sub>24</sub> ClN <sub>5</sub> O <sub>2</sub> | (M+2H)+2 |
| 238.58835 | 2 | 63947.56  | C <sub>26</sub> H <sub>24</sub> ClN <sub>5</sub> O <sub>2</sub> | (M+2H)+2 |
| 239.08921 | 2 | 18574.45  | C <sub>26</sub> H <sub>24</sub> ClN <sub>5</sub> O <sub>2</sub> | (M+2H)+2 |
| 474.16951 | 1 | 289434.91 | C <sub>26</sub> H <sub>24</sub> ClN <sub>5</sub> O <sub>2</sub> | (M+H)+   |
| 475.17305 | 1 | 82300.32  | C <sub>26</sub> H <sub>24</sub> ClN <sub>5</sub> O <sub>2</sub> | (M+H)+   |
| 476.16842 | 1 | 97417.02  | C <sub>26</sub> H <sub>24</sub> ClN <sub>5</sub> O <sub>2</sub> | (M+H)+   |
| 477.1703  | 1 | 27186.92  | C <sub>26</sub> H <sub>24</sub> ClN <sub>5</sub> O <sub>2</sub> | (M+H)+   |
| 478.17241 | 1 | 3926.4    | C <sub>26</sub> H <sub>24</sub> ClN <sub>5</sub> O <sub>2</sub> | (M+H)+   |
| 496.15186 | 1 | 5851.76   | C <sub>26</sub> H <sub>24</sub> ClN <sub>5</sub> O <sub>2</sub> | (M+Na)+  |

## HRMS spectrum of compound 9.

**Compound Table**

| Compound Label                                                         | RT    | Mass      | Abund | Formula                                                         | Tgt Mass  | Diff (ppm) | MFG Formula                                                     | DB Formula                                                      |
|------------------------------------------------------------------------|-------|-----------|-------|-----------------------------------------------------------------|-----------|------------|-----------------------------------------------------------------|-----------------------------------------------------------------|
| Cpd 1: C <sub>26</sub> H <sub>28</sub> ClN <sub>3</sub> O <sub>4</sub> | 4.297 | 481.17663 | 37232 | C <sub>26</sub> H <sub>28</sub> ClN <sub>3</sub> O <sub>4</sub> | 481.17683 | -0.42      | C <sub>26</sub> H <sub>28</sub> ClN <sub>3</sub> O <sub>4</sub> | C <sub>26</sub> H <sub>28</sub> ClN <sub>3</sub> O <sub>4</sub> |

| Compound Label                                                         | m/z      | RT    | Algorithm       | Mass      |
|------------------------------------------------------------------------|----------|-------|-----------------|-----------|
| Cpd 1: C <sub>26</sub> H <sub>28</sub> ClN <sub>3</sub> O <sub>4</sub> | 504.1658 | 4.297 | Find By Formula | 481.17663 |

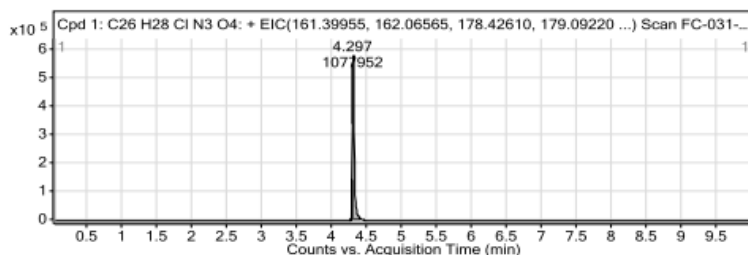

**MS Spectrum**

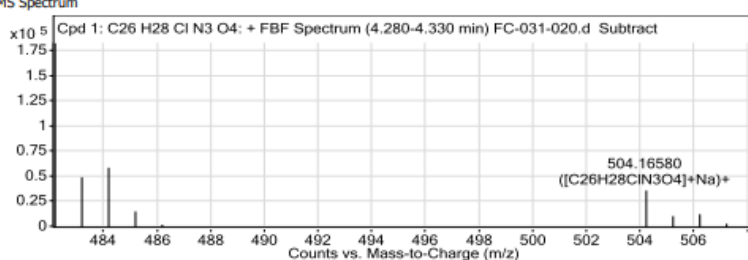

**MS Zoomed Spectrum**

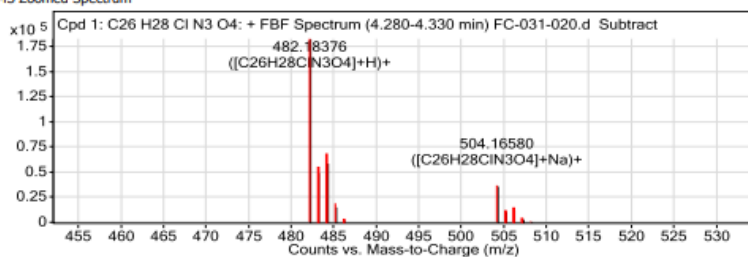

**MS Spectrum Peak List**

| m/z       | z | Abund     | Formula                                                         | Ion     |
|-----------|---|-----------|-----------------------------------------------------------------|---------|
| 482.18376 | 1 | 182996.75 | C <sub>26</sub> H <sub>28</sub> ClN <sub>3</sub> O <sub>4</sub> | (M+H)+  |
| 483.18716 | 1 | 49737.66  | C <sub>26</sub> H <sub>28</sub> ClN <sub>3</sub> O <sub>4</sub> | (M+H)+  |
| 484.18257 | 1 | 59264.19  | C <sub>26</sub> H <sub>28</sub> ClN <sub>3</sub> O <sub>4</sub> | (M+H)+  |
| 485.18465 | 1 | 16443.3   | C <sub>26</sub> H <sub>28</sub> ClN <sub>3</sub> O <sub>4</sub> | (M+H)+  |
| 486.18721 | 1 | 2825.65   | C <sub>26</sub> H <sub>28</sub> ClN <sub>3</sub> O <sub>4</sub> | (M+H)+  |
| 504.1658  | 1 | 37232.25  | C <sub>26</sub> H <sub>28</sub> ClN <sub>3</sub> O <sub>4</sub> | (M+Na)+ |

|           |   |          |                                                                 |         |
|-----------|---|----------|-----------------------------------------------------------------|---------|
| 505.16878 | 1 | 11131.56 | C <sub>26</sub> H <sub>28</sub> ClN <sub>3</sub> O <sub>4</sub> | (M+Na)+ |
| 506.16439 | 1 | 12921.83 | C <sub>26</sub> H <sub>28</sub> ClN <sub>3</sub> O <sub>4</sub> | (M+Na)+ |
| 507.1668  | 1 | 3852.73  | C <sub>26</sub> H <sub>28</sub> ClN <sub>3</sub> O <sub>4</sub> | (M+Na)+ |
| 508.16935 | 1 | 614.85   | C <sub>26</sub> H <sub>28</sub> ClN <sub>3</sub> O <sub>4</sub> | (M+Na)+ |

## HRMS spectrum of compound 10.

**Compound Table**

| Compound Label          | RT    | Mass      | Abund | Formula          | Tgt Mass | Diff (ppm) | MFG Formula      | DB Formula       |
|-------------------------|-------|-----------|-------|------------------|----------|------------|------------------|------------------|
| Cpd 1: C27 H30 Cl N3 O5 | 4.871 | 511.18739 | 57351 | C27 H30 Cl N3 O5 | 511.1874 | -0.02      | C27 H30 Cl N3 O5 | C27 H30 Cl N3 O5 |

| Compound Label          | m/z       | RT    | Algorithm       | Mass      |
|-------------------------|-----------|-------|-----------------|-----------|
| Cpd 1: C27 H30 Cl N3 O5 | 534.17659 | 4.871 | Find By Formula | 511.18739 |

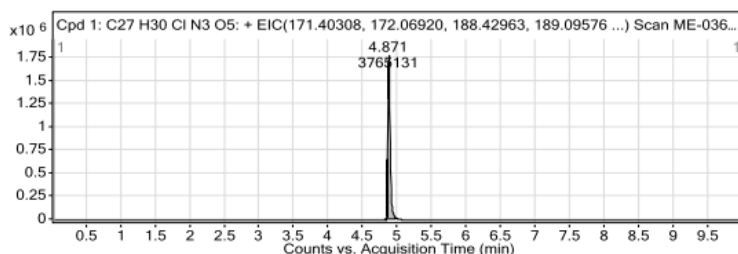

**MS Spectrum**

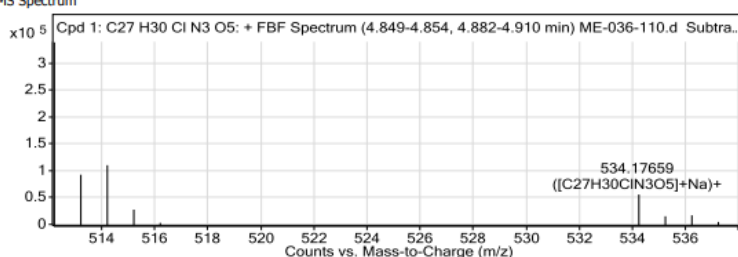

**MS Zoomed Spectrum**

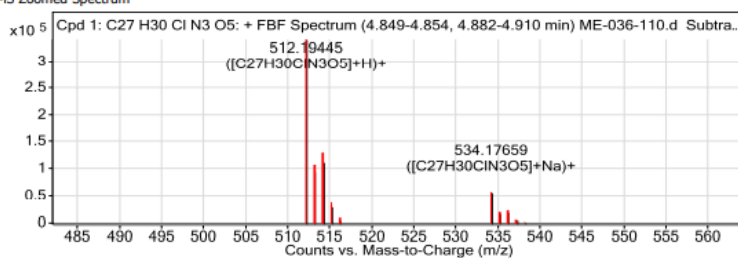

**MS Spectrum Peak List**

| m/z       | z | Abund     | Formula      | Ion     |
|-----------|---|-----------|--------------|---------|
| 512.19445 | 1 | 339386.69 | C27H30ClN3O5 | (M+H)+  |
| 513.19826 | 1 | 94116.85  | C27H30ClN3O5 | (M+H)+  |
| 514.19328 | 1 | 111604.04 | C27H30ClN3O5 | (M+H)+  |
| 515.19565 | 1 | 29840.23  | C27H30ClN3O5 | (M+H)+  |
| 516.19829 | 1 | 5702.67   | C27H30ClN3O5 | (M+H)+  |
| 534.17659 | 1 | 57350.79  | C27H30ClN3O5 | (M+Na)+ |
| 535.17963 | 1 | 17943.2   | C27H30ClN3O5 | (M+Na)+ |
| 536.17515 | 1 | 19294.82  | C27H30ClN3O5 | (M+Na)+ |
| 537.17738 | 1 | 6173.54   | C27H30ClN3O5 | (M+Na)+ |
| 538.18016 | 1 | 1050.19   | C27H30ClN3O5 | (M+Na)+ |

## HRMS spectrum of compound 11.

**Compound Table**

| Compound Label            | RT    | Mass      | Abund | Formula            | Tgt Mass  | Diff (ppm) | MFG Formula        | DB Formula         |
|---------------------------|-------|-----------|-------|--------------------|-----------|------------|--------------------|--------------------|
| Cpd 1: C27 H31 Cl N6 O2 S | 4.021 | 538.19225 | 52774 | C27 H31 Cl N6 O2 S | 538.19177 | 0.88       | C27 H31 Cl N6 O2 S | C27 H31 Cl N6 O2 S |

| Compound Label            | m/z       | RT    | Algorithm       | Mass      |
|---------------------------|-----------|-------|-----------------|-----------|
| Cpd 1: C27 H31 Cl N6 O2 S | 561.18112 | 4.021 | Find By Formula | 538.19225 |

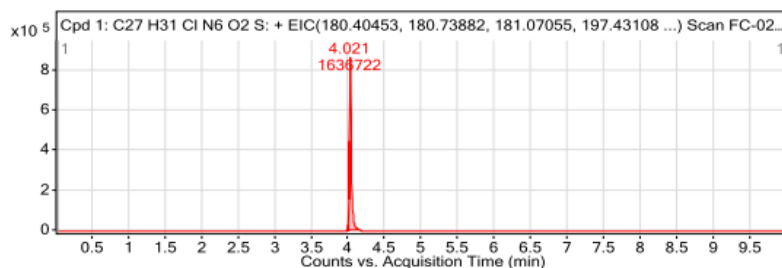

**MS Spectrum**

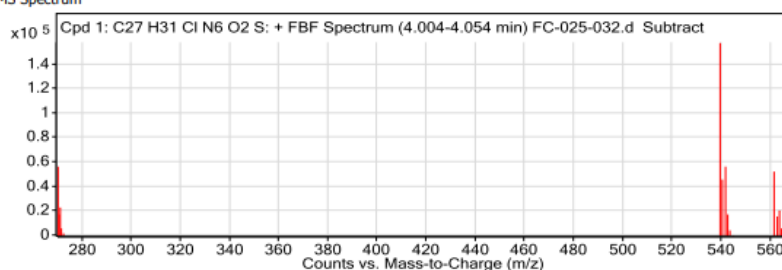

**MS Zoomed Spectrum**

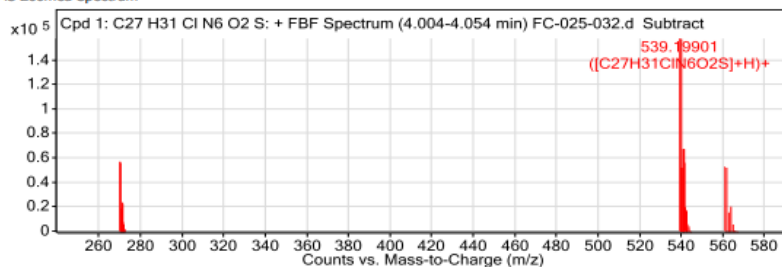

**MS Spectrum Peak List**

| m/z       | z | Abund     | Formula       | Ion      |
|-----------|---|-----------|---------------|----------|
| 270.10405 | 2 | 56714.16  | C27H31ClN6O2S | (M+2H)+2 |
| 270.60526 | 2 | 17889.2   | C27H31ClN6O2S | (M+2H)+2 |
| 271.10304 | 2 | 23503.15  | C27H31ClN6O2S | (M+2H)+2 |
| 539.19901 | 1 | 157504.05 | C27H31ClN6O2S | (M+H)+   |
| 540.20206 | 1 | 46342.99  | C27H31ClN6O2S | (M+H)+   |
| 541.19763 | 1 | 56692.84  | C27H31ClN6O2S | (M+H)+   |
| 542.19947 | 1 | 17576.69  | C27H31ClN6O2S | (M+H)+   |
| 561.18112 | 1 | 52773.51  | C27H31ClN6O2S | (M+Na)+  |
| 562.18393 | 1 | 16455.31  | C27H31ClN6O2S | (M+Na)+  |
| 563.1792  | 1 | 21010.46  | C27H31ClN6O2S | (M+Na)+  |

## HRMS spectrum of compound 12.

**Compound Table**

| Compound Label          | RT    | Mass      | Abund | Formula          | Tgt Mass  | Diff (ppm) | MFG Formula      | DB Formula       |
|-------------------------|-------|-----------|-------|------------------|-----------|------------|------------------|------------------|
| Cpd 1: C27 H30 Cl N3 O4 | 4.314 | 495.19277 | 50546 | C27 H30 Cl N3 O4 | 495.19248 | 0.58       | C27 H30 Cl N3 O4 | C27 H30 Cl N3 O4 |

| Compound Label          | m/z       | RT    | Algorithm       | Mass      |
|-------------------------|-----------|-------|-----------------|-----------|
| Cpd 1: C27 H30 Cl N3 O4 | 518.18198 | 4.314 | Find By Formula | 495.19277 |

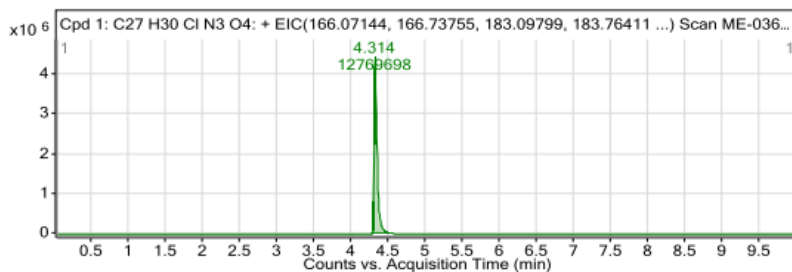

**MS Spectrum**

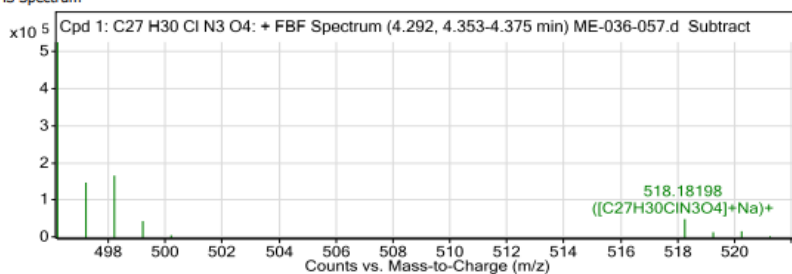

**MS Zoomed Spectrum**

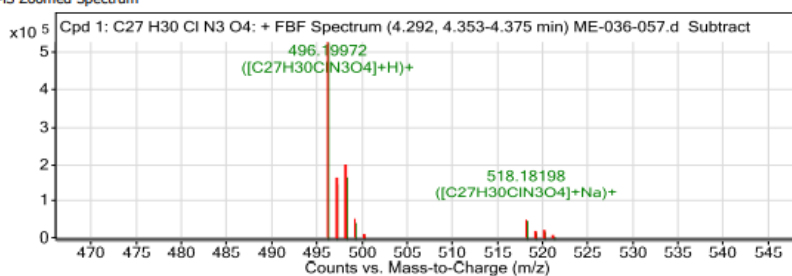

**MS Spectrum Peak List**

| m/z       | z | Abund     | Formula      | Ion     |
|-----------|---|-----------|--------------|---------|
| 496.19972 | 1 | 527992.94 | C27H30ClN3O4 | (M+H)+  |
| 497.20368 | 1 | 148344.42 | C27H30ClN3O4 | (M+H)+  |
| 498.19902 | 1 | 169254.53 | C27H30ClN3O4 | (M+H)+  |
| 499.20092 | 1 | 47283.12  | C27H30ClN3O4 | (M+H)+  |
| 500.20347 | 1 | 8687.98   | C27H30ClN3O4 | (M+H)+  |
| 501.20541 | 1 | 996.71    | C27H30ClN3O4 | (M+H)+  |
| 518.18198 | 1 | 50545.79  | C27H30ClN3O4 | (M+Na)+ |
| 519.18513 | 1 | 16134.46  | C27H30ClN3O4 | (M+Na)+ |
| 520.1801  | 1 | 18399.74  | C27H30ClN3O4 | (M+Na)+ |
| 521.1822  | 1 | 5792.38   | C27H30ClN3O4 | (M+Na)+ |

## HRMS spectrum of compound 13.

### Compound Table

| Compound Label          | RT    | Mass      | Abund | Formula          | Tgt Mass  | Diff (ppm) | MFG Formula      | DB Formula       |
|-------------------------|-------|-----------|-------|------------------|-----------|------------|------------------|------------------|
| Cpd 1: C28 H32 Cl N3 O4 | 4.369 | 509.20848 | 35024 | C28 H32 Cl N3 O4 | 509.20813 | 0.67       | C28 H32 Cl N3 O4 | C28 H32 Cl N3 O4 |

| Compound Label          | m/z      | RT    | Algorithm       | Mass      |
|-------------------------|----------|-------|-----------------|-----------|
| Cpd 1: C28 H32 Cl N3 O4 | 532.1975 | 4.369 | Find By Formula | 509.20848 |

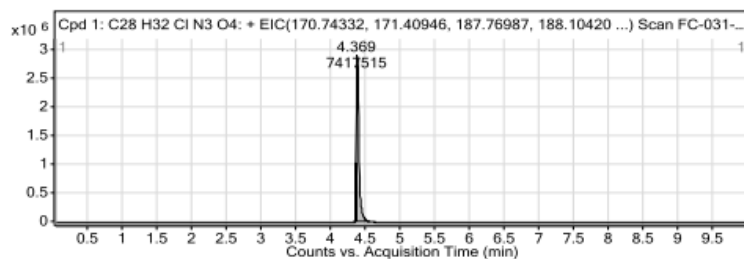

### MS Spectrum

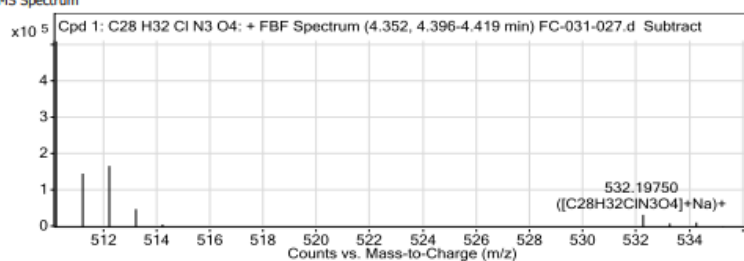

### MS Zoomed Spectrum

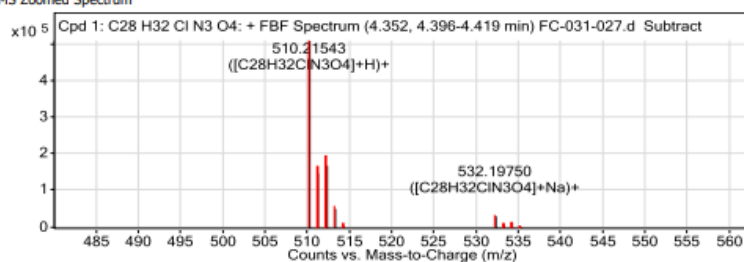

### MS Spectrum Peak List

| m/z       | z | Abund     | Formula      | Ion     |
|-----------|---|-----------|--------------|---------|
| 510.21543 | 1 | 511181.84 | C28H32ClN3O4 | (M+H)+  |
| 511.21948 | 1 | 147762.09 | C28H32ClN3O4 | (M+H)+  |
| 512.21465 | 1 | 168180.02 | C28H32ClN3O4 | (M+H)+  |
| 513.21672 | 1 | 49121.18  | C28H32ClN3O4 | (M+H)+  |
| 514.2194  | 1 | 8512.21   | C28H32ClN3O4 | (M+H)+  |
| 515.22187 | 1 | 1247.41   | C28H32ClN3O4 | (M+H)+  |
| 532.1975  | 1 | 35024.35  | C28H32ClN3O4 | (M+Na)+ |
| 533.20099 | 1 | 10584.68  | C28H32ClN3O4 | (M+Na)+ |
| 534.19626 | 1 | 12706.97  | C28H32ClN3O4 | (M+Na)+ |
| 535.19772 | 1 | 3672.92   | C28H32ClN3O4 | (M+Na)+ |



## HRMS spectrum of compound 14.

**Compound Table**

| Compound Label                                                         | RT    | Mass      | Abund  | Formula                                                         | Tgt Mass | Diff (ppm) | MFG Formula                                                     | DB Formula                                                      |
|------------------------------------------------------------------------|-------|-----------|--------|-----------------------------------------------------------------|----------|------------|-----------------------------------------------------------------|-----------------------------------------------------------------|
| Cpd 1: C <sub>29</sub> H <sub>34</sub> ClN <sub>3</sub> O <sub>5</sub> | 4.591 | 539.21911 | 134312 | C <sub>29</sub> H <sub>34</sub> ClN <sub>3</sub> O <sub>5</sub> | 539.2187 | 0.76       | C <sub>29</sub> H <sub>34</sub> ClN <sub>3</sub> O <sub>5</sub> | C <sub>29</sub> H <sub>34</sub> ClN <sub>3</sub> O <sub>5</sub> |

| Compound Label                                                         | m/z       | RT    | Algorithm       | Mass      |
|------------------------------------------------------------------------|-----------|-------|-----------------|-----------|
| Cpd 1: C <sub>29</sub> H <sub>34</sub> ClN <sub>3</sub> O <sub>5</sub> | 562.20841 | 4.591 | Find By Formula | 539.21911 |

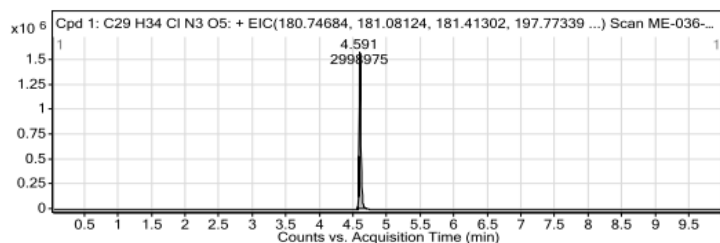

**MS Spectrum**

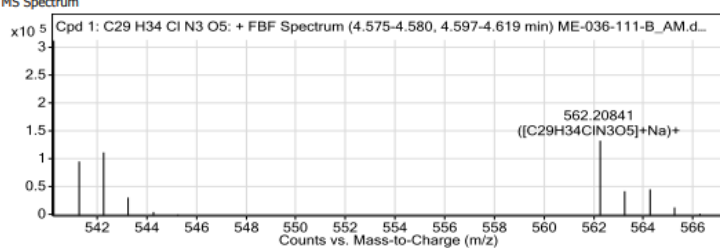

**MS Zoomed Spectrum**

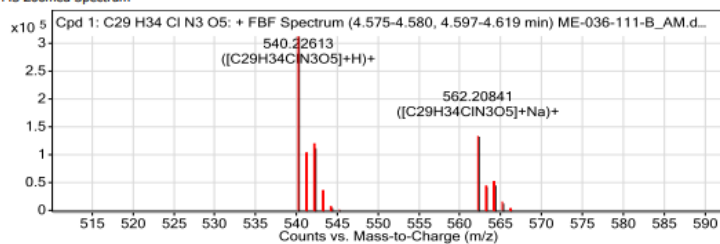

**MS Spectrum Peak List**

| m/z       | z | Abund     | Formula                                                         | Ion                 |
|-----------|---|-----------|-----------------------------------------------------------------|---------------------|
| 540.22613 | 1 | 313373.69 | C <sub>29</sub> H <sub>34</sub> ClN <sub>3</sub> O <sub>5</sub> | (M+H) <sup>+</sup>  |
| 541.23003 | 1 | 96632.58  | C <sub>29</sub> H <sub>34</sub> ClN <sub>3</sub> O <sub>5</sub> | (M+H) <sup>+</sup>  |
| 542.22528 | 1 | 112542.21 | C <sub>29</sub> H <sub>34</sub> ClN <sub>3</sub> O <sub>5</sub> | (M+H) <sup>+</sup>  |
| 543.22737 | 1 | 31792.41  | C <sub>29</sub> H <sub>34</sub> ClN <sub>3</sub> O <sub>5</sub> | (M+H) <sup>+</sup>  |
| 544.22946 | 1 | 6094.23   | C <sub>29</sub> H <sub>34</sub> ClN <sub>3</sub> O <sub>5</sub> | (M+H) <sup>+</sup>  |
| 562.20841 | 1 | 134312.09 | C <sub>29</sub> H <sub>34</sub> ClN <sub>3</sub> O <sub>5</sub> | (M+Na) <sup>+</sup> |
| 563.21115 | 1 | 43242.53  | C <sub>29</sub> H <sub>34</sub> ClN <sub>3</sub> O <sub>5</sub> | (M+Na) <sup>+</sup> |
| 564.2069  | 1 | 46677.24  | C <sub>29</sub> H <sub>34</sub> ClN <sub>3</sub> O <sub>5</sub> | (M+Na) <sup>+</sup> |
| 565.20909 | 1 | 14458.06  | C <sub>29</sub> H <sub>34</sub> ClN <sub>3</sub> O <sub>5</sub> | (M+Na) <sup>+</sup> |
| 566.21185 | 1 | 2893.19   | C <sub>29</sub> H <sub>34</sub> ClN <sub>3</sub> O <sub>5</sub> | (M+Na) <sup>+</sup> |

## HRMS spectrum of compound 15.

**Compound Table**

| Compound Label          | RT    | Mass     | Abund | Formula          | Tgt Mass | Diff (ppm) | MFG Formula      | DB Formula       |
|-------------------------|-------|----------|-------|------------------|----------|------------|------------------|------------------|
| Cpd 1: C31 H38 Cl N3 O5 | 4.858 | 567.2501 | 53373 | C31 H38 Cl N3 O5 | 567.25   | 0.19       | C31 H38 Cl N3 O5 | C31 H38 Cl N3 O5 |

| Compound Label          | m/z       | RT    | Algorithm       | Mass     |
|-------------------------|-----------|-------|-----------------|----------|
| Cpd 1: C31 H38 Cl N3 O5 | 590.23905 | 4.858 | Find By Formula | 567.2501 |

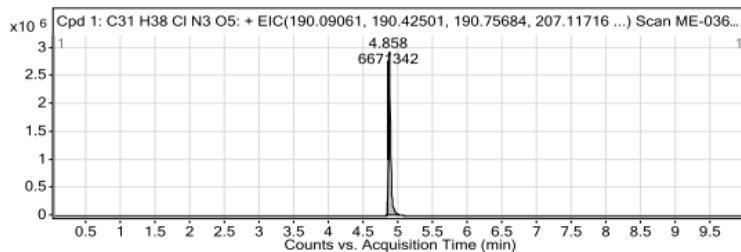

**MS Spectrum**

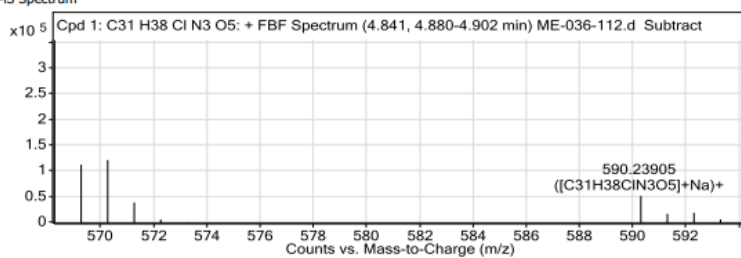

**MS Zoomed Spectrum**

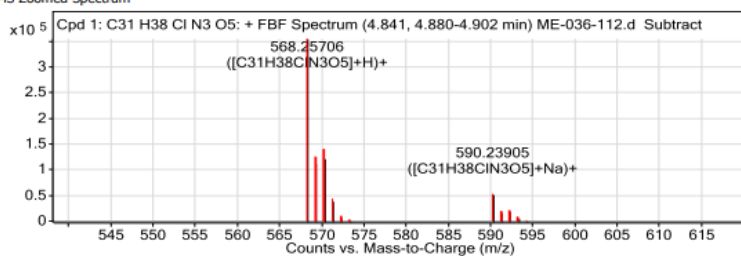

**MS Spectrum Peak List**

| m/z       | z | Abund     | Formula      | Ion     |
|-----------|---|-----------|--------------|---------|
| 568.25706 | 1 | 354780.25 | C31H38ClN3O5 | (M+H)+  |
| 569.26094 | 1 | 113831.38 | C31H38ClN3O5 | (M+H)+  |
| 570.25682 | 1 | 122164.05 | C31H38ClN3O5 | (M+H)+  |
| 571.25829 | 1 | 39661.86  | C31H38ClN3O5 | (M+H)+  |
| 572.26115 | 1 | 7175.91   | C31H38ClN3O5 | (M+H)+  |
| 590.23905 | 1 | 53373.13  | C31H38ClN3O5 | (M+Na)+ |
| 591.24211 | 1 | 19025.9   | C31H38ClN3O5 | (M+Na)+ |
| 592.23807 | 1 | 19559.61  | C31H38ClN3O5 | (M+Na)+ |
| 593.24063 | 1 | 6599.79   | C31H38ClN3O5 | (M+Na)+ |
| 594.24234 | 1 | 1380.94   | C31H38ClN3O5 | (M+Na)+ |

## HRMS spectrum of compound 16.

**Compound Table**

| Compound Label          | RT    | Mass      | Abund  | Formula          | Tgt Mass  | Diff (ppm) | MFG Formula      | DB Formula       |
|-------------------------|-------|-----------|--------|------------------|-----------|------------|------------------|------------------|
| Cpd 1: C30 H35 Cl N4 O6 | 4.363 | 582.22474 | 410649 | C30 H35 Cl N4 O6 | 582.22451 | 0.4        | C30 H35 Cl N4 O6 | C30 H35 Cl N4 O6 |

| Compound Label          | m/z       | RT    | Algorithm       | Mass      |
|-------------------------|-----------|-------|-----------------|-----------|
| Cpd 1: C30 H35 Cl N4 O6 | 583.23176 | 4.363 | Find By Formula | 582.22474 |

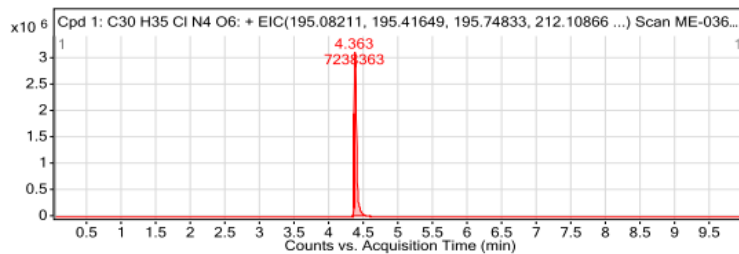

**MS Spectrum**

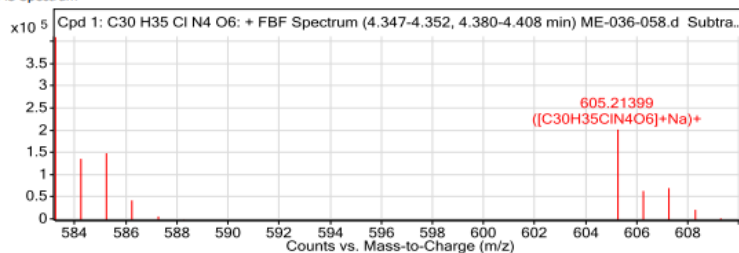

**MS Zoomed Spectrum**

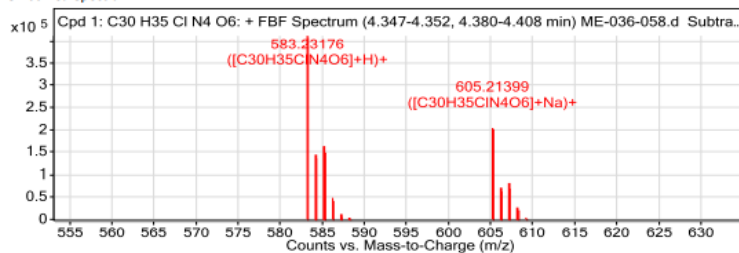

**MS Spectrum Peak List**

| m/z       | z | Abund     | Formula      | Ion     |
|-----------|---|-----------|--------------|---------|
| 583.23176 | 1 | 410649.41 | C30H35ClN4O6 | (M+H)+  |
| 584.23541 | 1 | 138070.45 | C30H35ClN4O6 | (M+H)+  |
| 585.23108 | 1 | 151338.73 | C30H35ClN4O6 | (M+H)+  |
| 586.233   | 1 | 45319.11  | C30H35ClN4O6 | (M+H)+  |
| 587.23544 | 1 | 8956.27   | C30H35ClN4O6 | (M+H)+  |
| 605.21399 | 1 | 203937.5  | C30H35ClN4O6 | (M+Na)+ |
| 606.21691 | 1 | 66147.31  | C30H35ClN4O6 | (M+Na)+ |
| 607.21292 | 1 | 72221.36  | C30H35ClN4O6 | (M+Na)+ |
| 608.21428 | 1 | 22598.62  | C30H35ClN4O6 | (M+Na)+ |
| 609.21733 | 1 | 4529.93   | C30H35ClN4O6 | (M+Na)+ |

## HRMS spectrum of compound 17.

**Compound Table**

| Compound Label          | RT    | Mass      | Abund | Formula          | Tgt Mass  | Diff (ppm) | MFG Formula      | DB Formula       |
|-------------------------|-------|-----------|-------|------------------|-----------|------------|------------------|------------------|
| Cpd 1: C27 H32 Cl N3 O5 | 4.162 | 513.20287 | 53862 | C27 H32 Cl N3 O5 | 513.20305 | -0.35      | C27 H32 Cl N3 O5 | C27 H32 Cl N3 O5 |

| Compound Label          | m/z       | RT    | Algorithm       | Mass      |
|-------------------------|-----------|-------|-----------------|-----------|
| Cpd 1: C27 H32 Cl N3 O5 | 536.19208 | 4.162 | Find By Formula | 513.20287 |

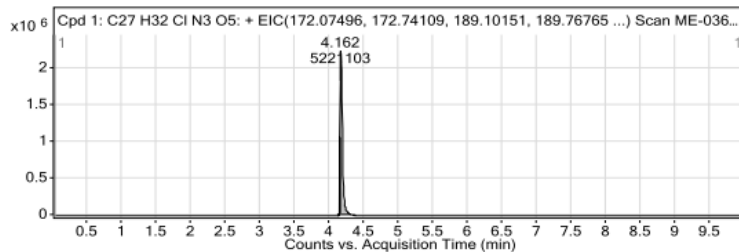

**MS Spectrum**

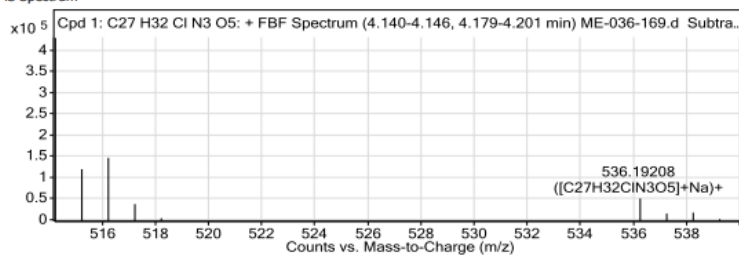

**MS Zoomed Spectrum**

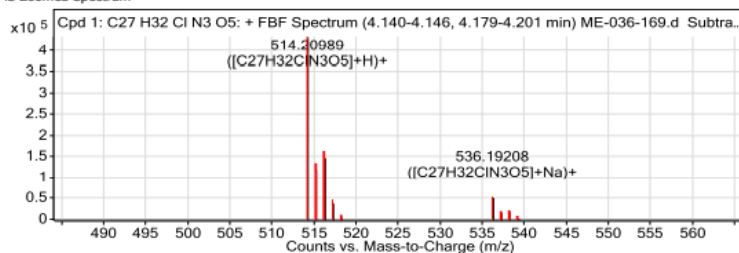

**MS Spectrum Peak List**

| m/z       | z | Abund     | Formula      | Ion     |
|-----------|---|-----------|--------------|---------|
| 514.20989 | 1 | 430828.34 | C27H32ClN3O5 | (M+H)+  |
| 515.21368 | 1 | 122883.82 | C27H32ClN3O5 | (M+H)+  |
| 516.20897 | 1 | 148415.59 | C27H32ClN3O5 | (M+H)+  |
| 517.21108 | 1 | 40932.54  | C27H32ClN3O5 | (M+H)+  |
| 518.21359 | 1 | 7345.8    | C27H32ClN3O5 | (M+H)+  |
| 519.21576 | 1 | 929.75    | C27H32ClN3O5 | (M+H)+  |
| 536.19208 | 1 | 53861.61  | C27H32ClN3O5 | (M+Na)+ |
| 537.1952  | 1 | 17825.01  | C27H32ClN3O5 | (M+Na)+ |
| 538.19038 | 1 | 20086.78  | C27H32ClN3O5 | (M+Na)+ |
| 539.19301 | 1 | 5546.55   | C27H32ClN3O5 | (M+Na)+ |

## HRMS spectrum of PROTAC-1.

**Compound Table**

| Compound Label              | RT    | Mass       | Abund | Formula              | Tgt Mass   | Diff (ppm) | MFG Formula          | DB Formula           |
|-----------------------------|-------|------------|-------|----------------------|------------|------------|----------------------|----------------------|
| Cpd 1: C54 H66 Cl N13 O5 S2 | 4.932 | 1075.44564 | 86228 | C54 H66 Cl N13 O5 S2 | 1075.44398 | 1.54       | C54 H66 Cl N13 O5 S2 | C54 H66 Cl N13 O5 S2 |

| Compound Label              | m/z       | RT    | Algorithm       | Mass       |
|-----------------------------|-----------|-------|-----------------|------------|
| Cpd 1: C54 H66 Cl N13 O5 S2 | 538.72972 | 4.932 | Find By Formula | 1075.44564 |

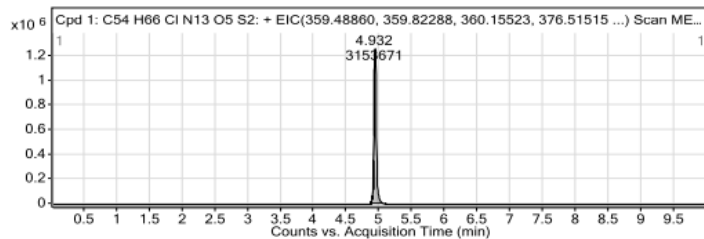

**MS Spectrum**

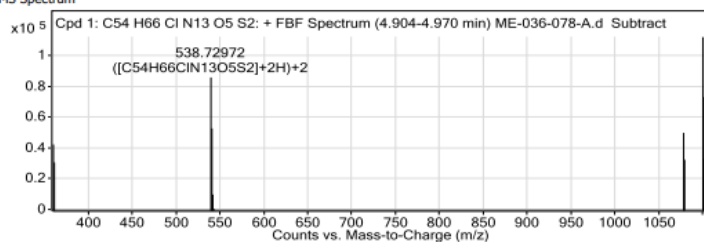

**MS Zoomed Spectrum**

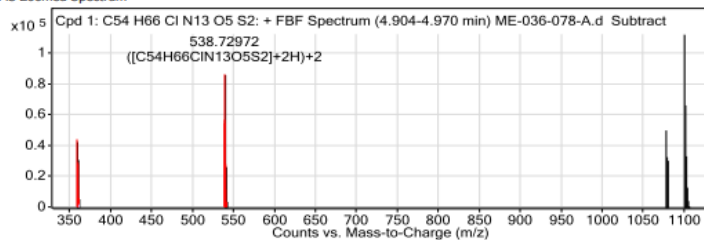

**MS Spectrum Peak List**

| m/z        | z | Abund     | Formula         | Ion      |
|------------|---|-----------|-----------------|----------|
| 359.48937  | 3 | 42551.19  | C54H66ClN13O5S2 | (M+3H)+3 |
| 538.72972  | 2 | 86228.26  | C54H66ClN13O5S2 | (M+2H)+2 |
| 539.23101  | 2 | 56998.94  | C54H66ClN13O5S2 | (M+2H)+2 |
| 539.72985  | 2 | 52932.13  | C54H66ClN13O5S2 | (M+2H)+2 |
| 1076.45214 | 1 | 50325.52  | C54H66ClN13O5S2 | (M+H)+   |
| 1077.4548  | 1 | 32705.15  | C54H66ClN13O5S2 | (M+H)+   |
| 1098.4348  | 1 | 112150.84 | C54H66ClN13O5S2 | (M+Na)+  |
| 1099.43727 | 1 | 73579.83  | C54H66ClN13O5S2 | (M+Na)+  |
| 1100.43482 | 1 | 66654.02  | C54H66ClN13O5S2 | (M+Na)+  |

## HRMS spectrum of PROTAC-3.

**Compound Table**

| Compound Label              | RT    | Mass      | Abund  | Formula              | Tgt Mass  | Diff (ppm) | MFG Formula          | DB Formula           |
|-----------------------------|-------|-----------|--------|----------------------|-----------|------------|----------------------|----------------------|
| Cpd 1: C48 H57 Cl N10 O5 S2 | 4.946 | 952.36612 | 187628 | C48 H57 Cl N10 O5 S2 | 952.36433 | 1.88       | C48 H57 Cl N10 O5 S2 | C48 H57 Cl N10 O5 S2 |

| Compound Label              | m/z       | RT    | Algorithm       | Mass      |
|-----------------------------|-----------|-------|-----------------|-----------|
| Cpd 1: C48 H57 Cl N10 O5 S2 | 975.35491 | 4.946 | Find By Formula | 952.36612 |

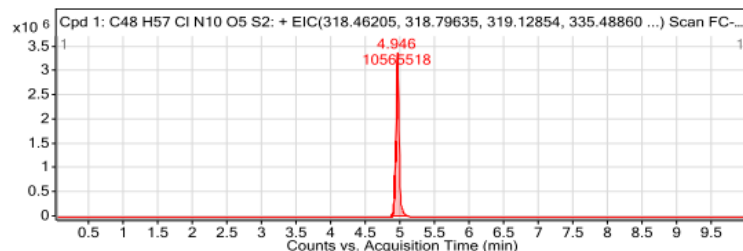

**MS Spectrum**

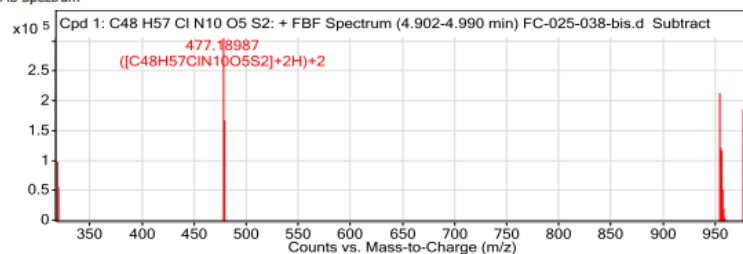

**MS Zoomed Spectrum**

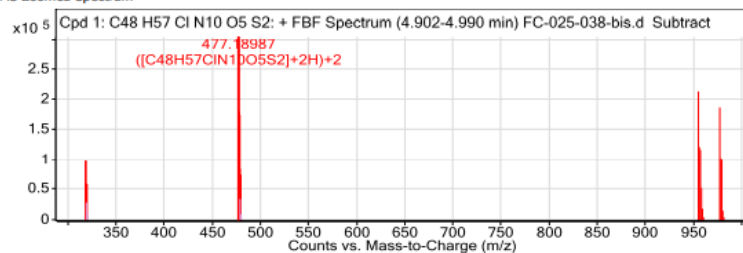

**MS Spectrum Peak List**

| m/z       | z | Abund     | Formula         | Ion      |
|-----------|---|-----------|-----------------|----------|
| 318.46373 | 3 | 98772.32  | C48H57ClN10O5S2 | (M+3H)+3 |
| 477.18987 | 2 | 305792.78 | C48H57ClN10O5S2 | (M+2H)+2 |
| 477.69164 | 2 | 175349.25 | C48H57ClN10O5S2 | (M+2H)+2 |
| 478.19023 | 2 | 168724.97 | C48H57ClN10O5S2 | (M+2H)+2 |
| 953.37249 | 1 | 214087.47 | C48H57ClN10O5S2 | (M+H)+   |
| 954.37579 | 1 | 122565.81 | C48H57ClN10O5S2 | (M+H)+   |
| 955.37308 | 1 | 117945.91 | C48H57ClN10O5S2 | (M+H)+   |
| 975.35491 | 1 | 187627.59 | C48H57ClN10O5S2 | (M+Na)+  |
| 976.35799 | 1 | 104013.87 | C48H57ClN10O5S2 | (M+Na)+  |
| 977.35484 | 1 | 102033.73 | C48H57ClN10O5S2 | (M+Na)+  |

## HRMS spectrum of PROTAC-4.

**Compound Table**

| Compound Label            | RT    | Mass      | Abund | Formula            | Tgt Mass  | Diff (ppm) | MFG Formula        | DB Formula         |
|---------------------------|-------|-----------|-------|--------------------|-----------|------------|--------------------|--------------------|
| Cpd 1: C48 H56 Cl N7 O7 S | 5.342 | 909.36635 | 46708 | C48 H56 Cl N7 O7 S | 909.36505 | 1.44       | C48 H56 Cl N7 O7 S | C48 H56 Cl N7 O7 S |

| Compound Label            | m/z     | RT    | Algorithm       | Mass      |
|---------------------------|---------|-------|-----------------|-----------|
| Cpd 1: C48 H56 Cl N7 O7 S | 910.373 | 5.342 | Find By Formula | 909.36635 |

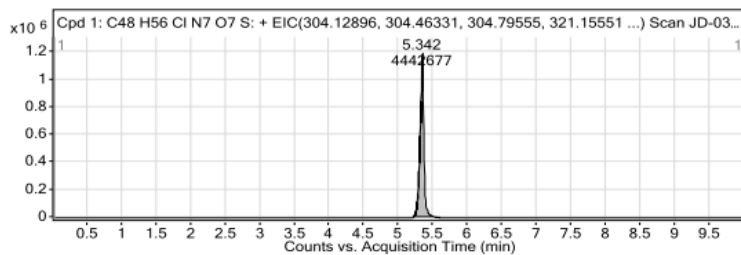

**MS Spectrum**

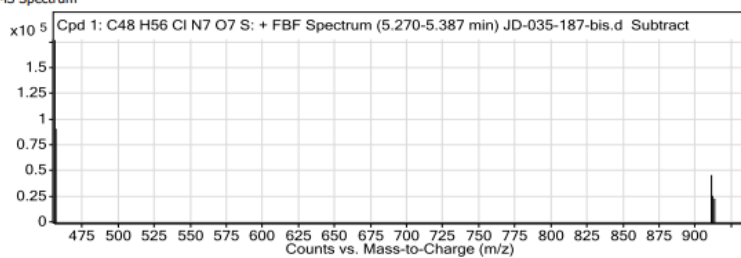

**MS Zoomed Spectrum**

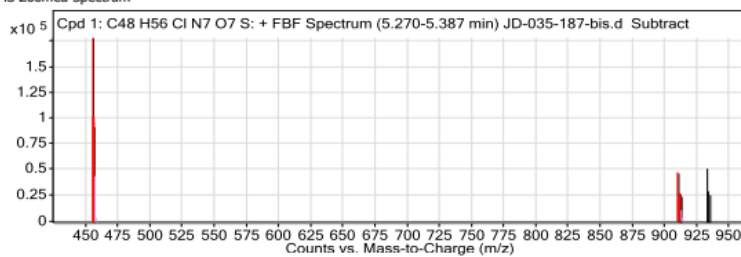

**MS Spectrum Peak List**

| m/z       | z | Abund    | Formula       | Ion      |
|-----------|---|----------|---------------|----------|
| 455.69041 | 2 | 177490.5 | C48H56ClN7O7S | (M+2H)+2 |
| 456.19229 | 2 | 91558.75 | C48H56ClN7O7S | (M+2H)+2 |
| 456.69079 | 2 | 86404.15 | C48H56ClN7O7S | (M+2H)+2 |
| 910.373   | 1 | 46707.92 | C48H56ClN7O7S | (M+H)+   |
| 911.3759  | 1 | 26835.89 | C48H56ClN7O7S | (M+H)+   |
| 912.37282 | 1 | 24063.18 | C48H56ClN7O7S | (M+H)+   |
| 932.35509 | 1 | 51225.63 | C48H56ClN7O7S | (M+Na)+  |
| 933.35797 | 1 | 29151.69 | C48H56ClN7O7S | (M+Na)+  |
| 934.35489 | 1 | 25987.66 | C48H56ClN7O7S | (M+Na)+  |

## HRMS spectrum of PROTAC-6.

**Compound Table**

| Compound Label            | RT  | Mass     | Abund | Formula            | Tgt Mass | Diff (ppm) | MFG Formula        | DB Formula         |
|---------------------------|-----|----------|-------|--------------------|----------|------------|--------------------|--------------------|
| Cpd 1: C49 H58 Cl N7 O7 S | 5.1 | 923.3814 | 18496 | C49 H58 Cl N7 O7 S | 923.3807 | 0.77       | C49 H58 Cl N7 O7 S | C49 H58 Cl N7 O7 S |

| Compound Label            | m/z       | RT  | Algorithm       | Mass     |
|---------------------------|-----------|-----|-----------------|----------|
| Cpd 1: C49 H58 Cl N7 O7 S | 924.38821 | 5.1 | Find By Formula | 923.3814 |

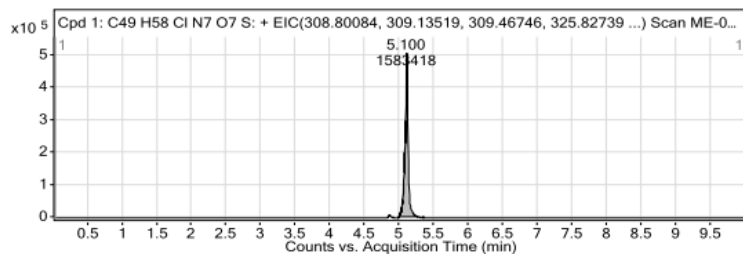

**MS Spectrum**

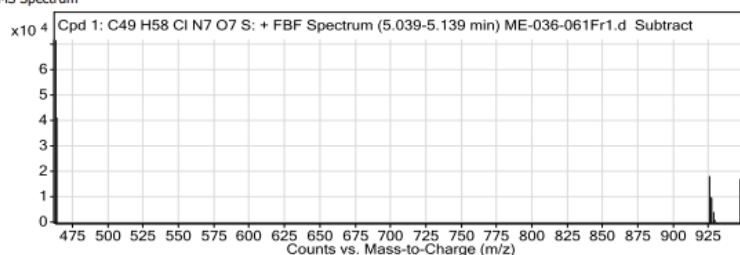

**MS Zoomed Spectrum**

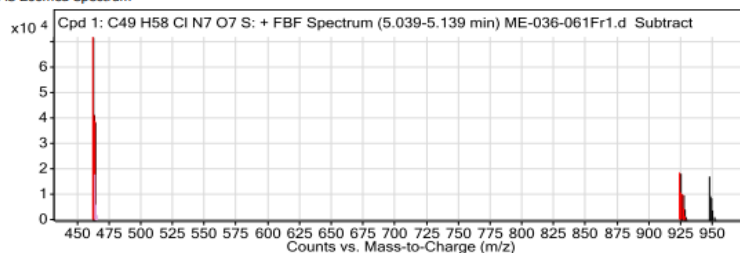

**MS Spectrum Peak List**

| m/z       | z | Abund    | Formula       | Ion      |
|-----------|---|----------|---------------|----------|
| 462.69813 | 2 | 71804.44 | C49H58ClN7O7S | (M+2H)+2 |
| 463.19944 | 2 | 41459.43 | C49H58ClN7O7S | (M+2H)+2 |
| 463.69822 | 2 | 38654.32 | C49H58ClN7O7S | (M+2H)+2 |
| 924.38821 | 1 | 18495.57 | C49H58ClN7O7S | (M+H)+   |
| 925.39104 | 1 | 10433.06 | C49H58ClN7O7S | (M+H)+   |
| 926.38806 | 1 | 9895.21  | C49H58ClN7O7S | (M+H)+   |
| 927.38958 | 1 | 4310.14  | C49H58ClN7O7S | (M+H)+   |
| 946.37011 | 1 | 17570.33 | C49H58ClN7O7S | (M+Na)+  |
| 947.37328 | 1 | 9555.73  | C49H58ClN7O7S | (M+Na)+  |
| 948.37043 | 1 | 8915.02  | C49H58ClN7O7S | (M+Na)+  |



## HRMS spectrum of PROTAC-8.

**Compound Table**

| Compound Label            | RT    | Mass       | Abund | Formula            | Tgt Mass   | Diff (ppm) | MFG Formula        | DB Formula         |
|---------------------------|-------|------------|-------|--------------------|------------|------------|--------------------|--------------------|
| Cpd 1: C56 H72 Cl N9 O8 S | 4.802 | 1065.49232 | 15606 | C56 H72 Cl N9 O8 S | 1065.49131 | 0.95       | C56 H72 Cl N9 O8 S | C56 H72 Cl N9 O8 S |

| Compound Label            | m/z        | RT    | Algorithm       | Mass       |
|---------------------------|------------|-------|-----------------|------------|
| Cpd 1: C56 H72 Cl N9 O8 S | 1088.48075 | 4.802 | Find By Formula | 1065.49232 |

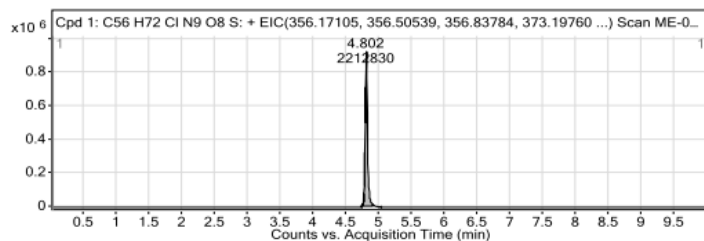

**MS Spectrum**

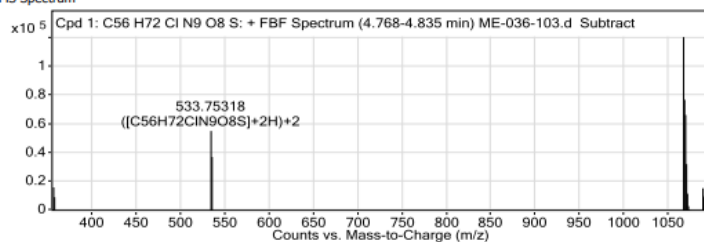

**MS Zoomed Spectrum**

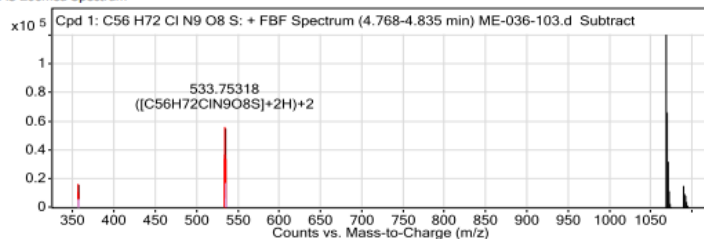

**MS Spectrum Peak List**

| m/z        | z | Abund     | Formula       | Ion      |
|------------|---|-----------|---------------|----------|
| 356.17161  | 3 | 16011.19  | C56H72ClN9O8S | (M+3H)+3 |
| 533.75318  | 2 | 55289.61  | C56H72ClN9O8S | (M+2H)+2 |
| 534.25473  | 2 | 37199.16  | C56H72ClN9O8S | (M+2H)+2 |
| 534.75367  | 2 | 33498.54  | C56H72ClN9O8S | (M+2H)+2 |
| 1066.49941 | 1 | 120649.41 | C56H72ClN9O8S | (M+H)+   |
| 1067.50277 | 1 | 76876.41  | C56H72ClN9O8S | (M+H)+   |
| 1068.50057 | 1 | 66258.23  | C56H72ClN9O8S | (M+H)+   |
| 1069.50122 | 1 | 32397.3   | C56H72ClN9O8S | (M+H)+   |
| 1070.50172 | 1 | 11563.65  | C56H72ClN9O8S | (M+H)+   |
| 1088.48075 | 1 | 15606.01  | C56H72ClN9O8S | (M+Na)+  |

## HRMS spectrum of PROTAC-10.

**Compound Table**

| Compound Label            | RT    | Mass      | Abund | Formula            | Tgt Mass  | Diff (ppm) | MFG Formula        | DB Formula         |
|---------------------------|-------|-----------|-------|--------------------|-----------|------------|--------------------|--------------------|
| Cpd 1: C52 H64 Cl N7 O9 S | 5.192 | 997.41841 | 48673 | C52 H64 Cl N7 O9 S | 997.41748 | 0.93       | C52 H64 Cl N7 O9 S | C52 H64 Cl N7 O9 S |

| Compound Label            | m/z        | RT    | Algorithm       | Mass      |
|---------------------------|------------|-------|-----------------|-----------|
| Cpd 1: C52 H64 Cl N7 O9 S | 1020.40766 | 5.192 | Find By Formula | 997.41841 |

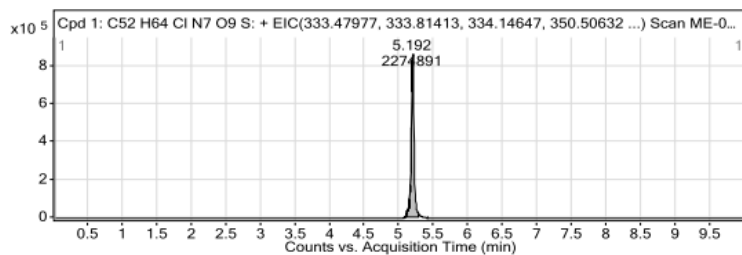

**MS Spectrum**

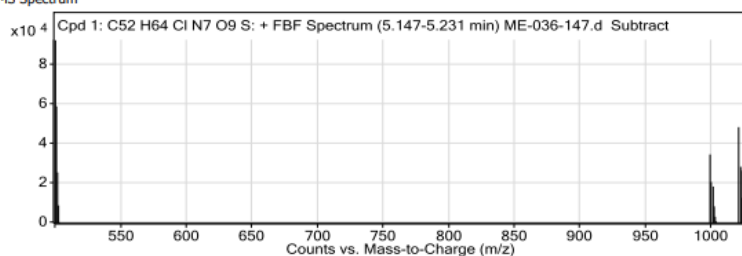

**MS Zoomed Spectrum**

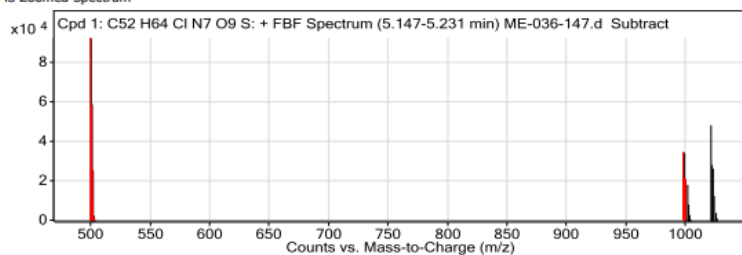

**MS Spectrum Peak List**

| m/z        | z | Abund    | Formula       | Ion      |
|------------|---|----------|---------------|----------|
| 499.7166   | 2 | 92544.39 | C52H64ClN7O9S | (M+2H)+2 |
| 500.218    | 2 | 59315.34 | C52H64ClN7O9S | (M+2H)+2 |
| 500.71671  | 2 | 55807.32 | C52H64ClN7O9S | (M+2H)+2 |
| 501.2172   | 2 | 25997.51 | C52H64ClN7O9S | (M+2H)+2 |
| 998.42541  | 1 | 34756.67 | C52H64ClN7O9S | (M+H)+   |
| 999.42826  | 1 | 20916.03 | C52H64ClN7O9S | (M+H)+   |
| 1000.42579 | 1 | 18528.41 | C52H64ClN7O9S | (M+H)+   |
| 1020.40766 | 1 | 48673.25 | C52H64ClN7O9S | (M+Na)+  |
| 1021.41037 | 1 | 28632.3  | C52H64ClN7O9S | (M+Na)+  |
| 1022.40775 | 1 | 26817.67 | C52H64ClN7O9S | (M+Na)+  |

## HRMS spectrum of PROTAC-11.

**Compound Table**

| Compound Label            | RT    | Mass       | Abund | Formula            | Tgt Mass   | Diff (ppm) | MFG Formula        | DB Formula         |
|---------------------------|-------|------------|-------|--------------------|------------|------------|--------------------|--------------------|
| Cpd 1: C54 H69 Cl N8 O9 S | 5.083 | 1040.46143 | 69860 | C54 H69 Cl N8 O9 S | 1040.45967 | 1.69       | C54 H69 Cl N8 O9 S | C54 H69 Cl N8 O9 S |

| Compound Label            | m/z        | RT    | Algorithm       | Mass       |
|---------------------------|------------|-------|-----------------|------------|
| Cpd 1: C54 H69 Cl N8 O9 S | 1063.45014 | 5.083 | Find By Formula | 1040.46143 |

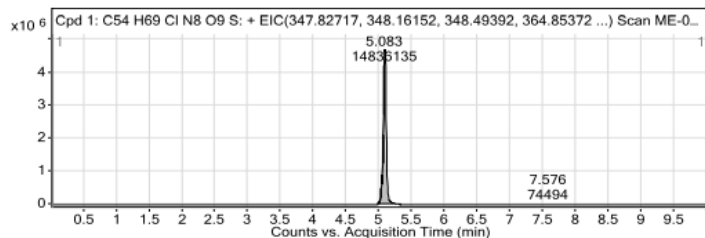

**MS Spectrum**

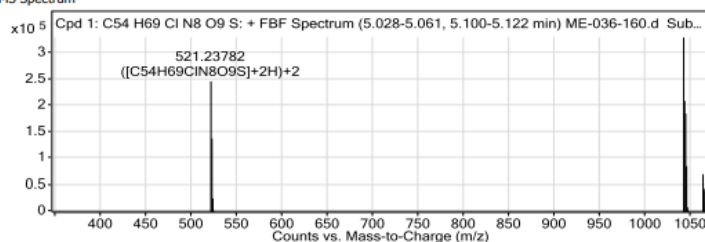

**MS Zoomed Spectrum**

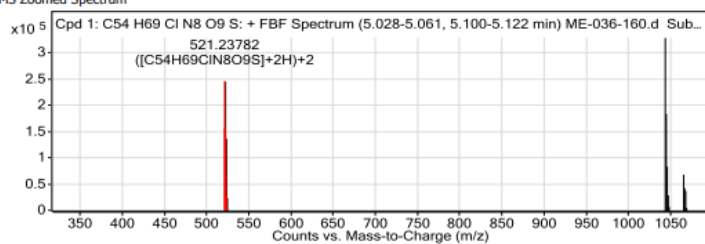

**MS Spectrum Peak List**

| m/z        | z | Abund     | Formula       | Ion      |
|------------|---|-----------|---------------|----------|
| 347.82731  | 3 | 567.09    | C54H69ClN8O9S | (M+3H)+3 |
| 521.23782  | 2 | 246895.86 | C54H69ClN8O9S | (M+2H)+2 |
| 521.73985  | 2 | 152410.08 | C54H69ClN8O9S | (M+2H)+2 |
| 522.2387   | 2 | 137520.28 | C54H69ClN8O9S | (M+2H)+2 |
| 522.73901  | 2 | 65446.45  | C54H69ClN8O9S | (M+2H)+2 |
| 1041.46818 | 1 | 329456.59 | C54H69ClN8O9S | (M+H)+   |
| 1042.47176 | 1 | 209486.42 | C54H69ClN8O9S | (M+H)+   |
| 1043.46929 | 1 | 185773.55 | C54H69ClN8O9S | (M+H)+   |
| 1044.47053 | 1 | 85317.9   | C54H69ClN8O9S | (M+H)+   |
| 1063.45014 | 1 | 69859.77  | C54H69ClN8O9S | (M+Na)+  |

## References

1. K. A. Menear, C. Adcock, R. Boulter, X. L. Cockcroft, L. Copsey, A. Cranston, K. J. Dillon, J. Drzewiecki, S. Garman, S. Gomez, H. Javaid, F. Kerrigan, C. Knights, A. Lau, V. M. Loh, Jr., I. T. Matthews, S. Moore, M. J. O'Connor, G. C. Smith and N. M. Martin, *J Med Chem*, 2008, **51**, 6581-6591.
2. L. Goracci, J. Desantis, A. Valeri, B. Castellani, M. Eleuteri and G. Cruciani, *J Med Chem*, 2020, **63**, 11615-11638.
3. C. Rossi, M. Porcelloni, P. D'Andrea, C. I. Fincham, A. Ettore, S. Mauro, A. Squarcia, M. Bigioni, M. Parlani, F. Nardelli, M. Binaschi, C. A. Maggi and D. Fattori, *Bioorg Med Chem Lett*, 2011, **21**, 2305-2308.
4. C. I. Fincham, A. Bressan, P. D'Andrea, A. Ettore, S. Giuliani, S. Mauro, S. Meini, M. Paris, L. Quartara, C. Rossi, A. Squarcia, C. Valenti, F. Daniela and C. A. Maggi, *Bioorg Med Chem*, 2012, **20**, 2091-2100.
5. Z. Quangrong, Z. Daohong, P. Pratik, L. Xingui, T. Dinesh, H. Wanyi, Z. Peiyi, L. Dongwen, Y. Yaxia and Z. Xuan, WO 2020-US17364, 2020.
6. P. C. Chua, M. Haddach, J. Y. Nagasawa and F. Pierre, WO2009108912, 2009.
7. A. Wang, K. Lv, Z. Tao, J. Gu, L. Fu, M. Liu, B. Wan, S. G. Franzblau, C. Ma, X. Ma, B. Han, A. Wang, S. Xu and Y. Lu, *Eur J Med Chem*, 2019, **181**, 111595.
8. L. T. van Wandelen, J. van Ameijde, A. S. Mady, A. E. Wammes, A. Bode, A. J. Poot, R. Ruijtenbeek and R. M. Liskamp, *ChemMedChem*, 2012, **7**, 2113-2121.
9. S. Zheng, G. Lingyue, M. J. H. Ong, D. Jacquemin, A. Romieu, J. A. Richard and R. Srinivasan, *Org Biomol Chem*, 2019, **17**, 4291-4300.
10. J. Z. Long, X. Jin, A. Adibekian, W. Li and B. F. Cravatt, *J Med Chem*, 2010, **53**, 1830-1842.

11. S. C. Gnoatto, A. Dassonville-Klimpt, S. Da Nascimento, P. Galera, K. Boumediene, G. Gosmann, P. Sonnet and S. Moslemi, *Eur J Med Chem*, 2008, **43**, 1865-1877.
12. K. Raina, J. Lu, Y. Qian, M. Altieri, D. Gordon, A. M. Rossi, J. Wang, X. Chen, H. Dong, K. Siu, J. D. Winkler, A. P. Crew, C. M. Crews and K. G. Coleman, *Proc Natl Acad Sci U S A*, 2016, **113**, 7124-7129.
13. C. Steinebach, Y. L. D. Ng, I. Susic, C. S. Lee, S. Chen, S. Lindner, L. P. Vu, A. Bricelj, R. Haschemi, M. Monschke, E. Steinwarz, K. G. Wagner, G. Bendas, J. Luo, M. Gutschow and J. Kronke, *Chem Sci*, 2020, **11**, 3474-3486.
